# Supplementary material for: Lithiated three-membered heterocycles as chiral nucleophiles in the enantioselective synthesis of 1-oxaspiro[2,3]hexanes
Source: Royal Society of Chemistry journal article supplement (doi:10.1039/d0ob00771d), 2021-01-01
Supplement: d0ob00771d1.pdf [file d0ob00771d1.pdf]

## Electronic Supplementary Information

### Lithiated three-membered heterocycles as chiral nucleophiles in the enantioselective synthesis of 1-oxaspiro[2.3]hexanes

Andrea Cocco,<sup>a</sup> Maria Grazia Rubanu,<sup>at</sup> Maria Laura Sechi,<sup>at</sup> Angelo Frongia,<sup>a</sup> Piero Mastrorilli,<sup>c</sup> Leonardo Degennaro,<sup>b</sup> Marco Colella,<sup>b</sup> Renzo Luisi,<sup>\*,b</sup> Francesco Secci<sup>\*,a</sup>

<sup>a</sup>Dipartimento di Scienze Chimiche e Geologiche, Università degli Studi di Cagliari, Complesso Universitario di Monserrato, S.S. 554, Bivio per Sestu, I-09042, Monserrato, Cagliari, ITALY e-mail: [fsecci@unica.it](mailto:fsecci@unica.it) phone number: (+39) 0706754408

<sup>b</sup>Dipartimento di Farmacia-Scienze del Farmaco, Università degli Studi di Bari, Aldo Moro, Via Edoardo Orabona 4, Bari I-70125, ITALY

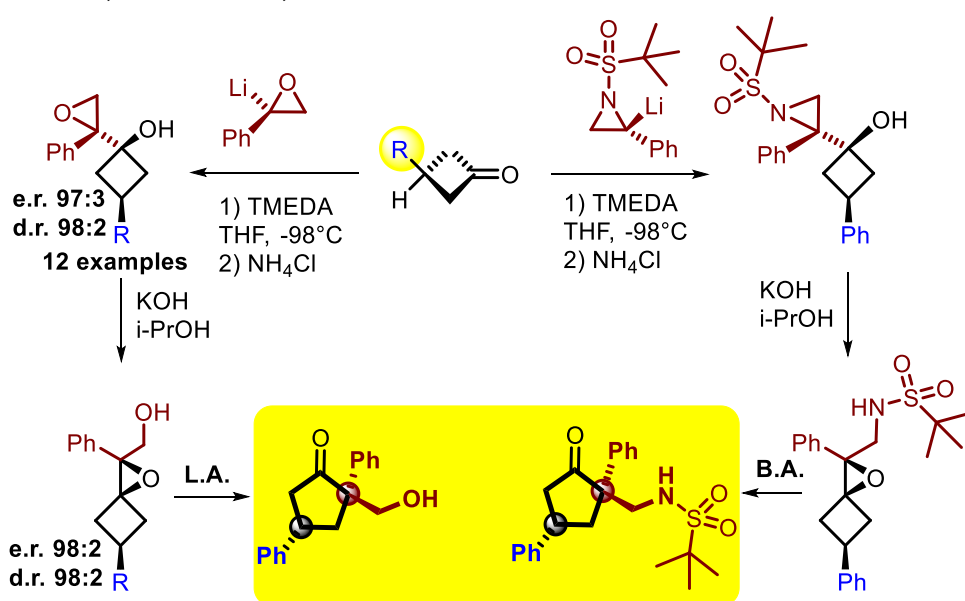

#### Table of Contents

|                                                                                                                                                                                                                           |     |
|---------------------------------------------------------------------------------------------------------------------------------------------------------------------------------------------------------------------------|-----|
| 1. Materials and methods                                                                                                                                                                                                  | S2  |
| 2. General procedure for the synthesis of chiral 1-(2-phenyloxiranyl)-3-substituted cyclobutanols and cyclohexanols <b>3a-l</b> , <b>3ab</b> , <b>3ad</b> and (±)-1-(2-phenylaziridin-2-yl)-3-phenylcyclobutanol <b>6</b> | S3  |
| 3. Optimization study of Payne rearrangement (Table 1)                                                                                                                                                                    | S9  |
| 4. General procedure for the synthesis of oxaspiroalkanes <b>4a-k</b> , <b>4ab</b> , <b>4ad</b> , <b>5</b> and (±)-azaspirooctane <b>7</b> .                                                                              | S10 |
| 5. Acid catalyzed C4-C5 ring expansion of spirocycle-adducts <b>4a</b> and <b>7</b> . Synthesis of cyclopentanones <b>8</b> and <b>9</b>                                                                                  | S15 |
| 6. Deprotection of Bus-sulfonamide <b>7</b>                                                                                                                                                                               | S17 |
| 7. <sup>1</sup> H and <sup>13</sup> C NMR spectra of compounds <b>3a-l</b> and <b>6</b>                                                                                                                                   | S18 |
| 8. <sup>1</sup> H and <sup>13</sup> C NMR spectra of compounds <b>4a-k</b> , <b>4ab</b> , <b>4ad</b> , <b>5</b> and <b>7</b>                                                                                              | S33 |
| 9. <sup>1</sup> H and <sup>13</sup> C NMR spectra of compounds <b>8</b> and <b>9</b>                                                                                                                                      | S48 |
| 10. Representative 2D-NMR experiments (COSY, NOESY, HSQC) of compounds <b>3a,3f,3h,4a,4f,4h,cis-6,7,9</b>                                                                                                                 | S50 |
| 11. HPLC traces of compounds <b>3</b> and <b>4</b>                                                                                                                                                                        | S57 |
| 12. References and notes                                                                                                                                                                                                  | S69 |

## 1. Materials and Methods

Unless stated otherwise, respectively the synthesis of compounds **3a-l** and **5a** were performed at the reported temperatures, in flame-dried round bottom flasks equipped with a stirring bar, under argon atmosphere as described below. Commercially available reagents were used as received unless otherwise noted. The cyclic ketones **2j-l** used in this work were purchased from Sigma Aldrich or TCI and used as received. Cyclobutanone derivatives **2a-i** were prepared following the corresponding literature or by modification of previously published procedures.<sup>1</sup> *s*-BuLi (1.4M in cyclohexane) was purchased from Sigma-Aldrich (titrated by using *N*-pivaloyl-*o*-toluidine prior use).<sup>2</sup> Bus-aziridine was prepared following previously published procedures.<sup>3</sup> *N,N,N,N*-tetramethylethylenediamine (TMEDA) was distilled over finely powdered CaH<sub>2</sub>. THF was distilled from sodium/ benzophenone ketyl. Ethyl acetate, was distilled using 3Å MS. Petroleum-ether (40-60) was dried on CaH<sub>2</sub>. Flash chromatography was performed using Merck 70-200 mesh silica gel. Analytical thin layer chromatography was performed using 0.25 mm Aldrich silica gel 60-F plates. Yields refer to chromatography and spectroscopically pure materials. <sup>1</sup>H NMR spectra were recorded on a 500 MHz Varian spectrometers at 25°C using CDCl<sub>3</sub> (ref. 7.26 ppm). <sup>13</sup>C NMR were recorded at 126 MHz (ref. CDCl<sub>3</sub> 77.00 ppm) using CDCl<sub>3</sub>, as solvent. Chemical shifts (δ) are given in ppm. Coupling constants (*J*) are reported in Hz. Infrared spectra were recorded on a FT-IR Bruker Equinox-55 spectrophotometer and are reported in wavenumbers (cm<sup>-1</sup>). Low Mass Spectra Analysis were recorded on an Agilent-HP GC-MS (E.I. 70eV). High Resolution Mass Spectra (HRMS) of compounds **2-7** were obtained using an High Resolution Mass Spectrometer in fast atom bombardment (FAB+) ionization mode (ESI) acquired using a Bruker micrOTF-Q II or/and Agilent Q-TOF 6520. Melting points were determined with a Büchi M-560. Specific rotations [α]<sub>D</sub><sup>T</sup> were measured using a polarimeter with a cell of path length 1.0 cm, at T °C and are given in 10<sup>-1</sup> deg·cm<sup>2</sup>·g<sup>-1</sup>. Concentrations (cc) are given in g/100 mL. Chiral HPLC analysis were performed by using the following instruments: Perkin-Helmer Flexar coupled with a P-H Flexar UV/Vis LC detector, Hitachi laChrom with a DAD L-2450 detector, Agilent-Technologies DAD S1200 and chiral HPLC columns: Chiralpak AD-H, OD-H, AS-H and Phenomenex-Lux 1. Enantiomerically enriched oxiranes **1b** and **1e** were prepared as described in the literature<sup>4</sup>

**2. General procedure for the synthesis of chiral 1-(2-phenyloxiranyl)-3-substituted cyclobutanols and cyclohexanols 3a-l, 3ab, 3ad and (±)-1-(2-phenylaziridin-2-yl)-3-phenylcyclobutanol 6**

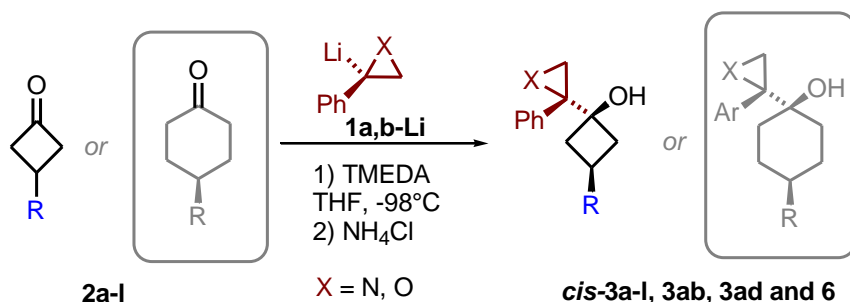

**Procedure A**

*s*-BuLi (1.4 M in cyclohexane, 950  $\mu\text{L}$ , 1.3 mmol) was added dropwise to a stirred solution of (*R*)-styreneoxide (122 mg, 1.0 mmol) and TMEDA (460  $\mu\text{L}$ , 3.0 mmol) in dry THF (9 mL) at  $-98\text{ }^\circ\text{C}$ . After 10 minutes at  $-98\text{ }^\circ\text{C}$  a precooled THF (4 mL) solution of cyclic ketones (1.0 mmol) was added. After 3 hours at  $-98\text{ }^\circ\text{C}$ , saturated aqueous  $\text{NH}_4\text{Cl}$  (10 mL) was added and the mixture was extracted with EtOAc ( $3 \times 10\text{ mL}$ ). The combined organic layers were dried ( $\text{Na}_2\text{SO}_4$ ), filtered and evaporated under reduced pressure. Purification by  $\text{SiO}_2$  flash chromatography (hexanes-diethyl ether 10:1-1:1 as eluents) gave the enantiomerically enriched substituted cycloalkanols **3a-l** (and **3ab**, **3ad**) as reported below.

**Procedure B**

*s*-BuLi (1.4 M in cyclohexane, 950  $\mu\text{L}$ , 1.3 mmol) was added dropwise to a stirred solution of (±)-1-(*tert*-butylsulfonyl)-2-phenylaziridine (239 mg, 1.0 mmol) and TMEDA (460  $\mu\text{L}$ , 3.0 mmol) in dry THF (9 mL) at  $-98\text{ }^\circ\text{C}$ . After 20 minutes at  $-98\text{ }^\circ\text{C}$  a precooled THF (4 mL) solution of ketone **2a** (1.0 mmol) was added. After 3 hours at  $-98\text{ }^\circ\text{C}$ , saturated aqueous  $\text{NH}_4\text{Cl}$  (10 mL) was added and the mixture was extracted with EtOAc ( $3 \times 10\text{ mL}$ ). The combined organic layers were dried ( $\text{Na}_2\text{SO}_4$ ), filtered and evaporated under reduced pressure. Purification by  $\text{SiO}_2$  flash chromatography (hexanes-diethyl ether 1:1 as eluents) gave the racemic substituted cycloalkanols **6** as reported below.

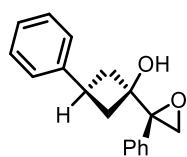

**(1s,3S)-1-[(*R*)-(2-Phenyloxiran-2-yl)]-3-phenylcyclobutanol (3a).**

Following the general procedure A described above, the reaction was performed in THF (9.0 mL) using cyclobutanone **2a** (146 mg, 1.0 mmol), **1a** (122 mg, 1.0 mmol), TMEDA (460  $\mu\text{L}$ , 3.0 mmol), *s*-BuLi (1.4M, 950  $\mu\text{L}$ , 1.3 mmol),  $-98\text{ }^\circ\text{C}$ . The crude product was purified by flash chromatography using hexanes-diethyl ether 10:1-1:1 as eluents. Colourless oil (90%); IR  $\nu_{\text{max}}$  ( $\text{cm}^{-1}$ ): 3445, 3059, 3027, 3982, 2936, 1495, 1447, 1247, 1024, 934, 754, 699;  $^1\text{H}$  NMR (500 MHz,  $\text{CDCl}_3$ )  $\delta$ : 7.58 (d,  $J = 6.8\text{ Hz}$ , 2H), 7.40-7.32 (m, 3H), 7.26 (dd,  $J = 13.8, 6.4\text{ Hz}$ , 2H), 7.17 (dd,  $J = 14.2, 7.2\text{ Hz}$ , 3H), 3.25 (d,  $J = 5.1\text{ Hz}$ , 1H), 2.86 (d,  $J = 5.1\text{ Hz}$ , 1H), 2.85-2.75 (m, 3H), 2.31-2.25 (m, 1H), 2.29 (s, 1H), 2.21-2.12 (m, 1H);  $^{13}\text{C}$  NMR (126 MHz,  $\text{CDCl}_3$ )  $\delta$ : 144.9, 136.9, 128.3, 128.1, 128.1, 127.8, 126.5, 125.9, 72.2, 62.4, 51.4, 40.7, 40.6, 29.8. HRMS (ESI-TOF)  $m/z$ : calculated for  $\text{C}_{18}\text{H}_{18}\text{NaO}_2$  [ $\text{M}+\text{Na}$ ] $^+$  289.1199; found 289.1204;  $[\alpha]_{\text{D}}^{20} = -28.2$  (c 1.0, chloroform); Chiral HPLC: Phenomenex-Lux 1 column, 90:10 (Hexane:*i*-PrOH), 1.0 ml/min, (97:3 e.r.), major: 11.96 min, minor: 14.58 min.

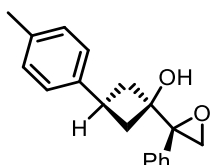

**(1s,3S)-1-[(R)-(2-Phenyloxiran-2-yl)]-3-(p-tolyl)cyclobutanol (3b).**

Following the general procedure A described above, the reaction was performed in THF (9.0 mL) using cyclobutanone **2b** (160 mg, 1.0 mmol), **1a** (122 mg, 1.0 mmol), TMEDA (460 $\mu$ L, 3.0 mmol), *s*-BuLi (1.4M, 950 $\mu$ L, 1.3 mmol), -98 $^{\circ}$  C. The crude product was purified by flash chromatography using hexanes-diethyl ether 10:1-1:1 as eluents. Colourless oil (90%); FT-IR  $\nu_{\max}$  (cm $^{-1}$ ): 3421, 2980, 2935, 1514, 1446, 1245, 1209, 1088, 1022, 931, 912, 807, 759, 699;  $^1\text{H}$  NMR (500 MHz, CDCl $_3$ )  $\delta$ : 7.50 (dd,  $J$  = 8.0, 1.3 Hz, 2H), 7.35-7.21 (m, 3H), 7.00 (s, 4H), 3.17 (d,  $J$  = 5.1 Hz, 1H), 2.78 (d,  $J$  = 5.1 Hz, 1H), 2.75-2.64 (m, 2H), 2.22 (s, 3H), 2.20-2.13 (m, 1H), 2.10-2.01 (m, 1H), 1.52 (br. s, 1H);  $^{13}\text{C}$  NMR (126 MHz, CDCl $_3$ )  $\delta$ : 141.9, 136.9, 135.4, 128.9, 128.1, 128.0, 127.8, 126.4, 72.2, 62.4, 51.4, 40.8, 40.7, 29.5, 20.9; HRMS (ESI-TOF)  $m/z$ : calculated for C $_{18}$ H $_{18}$ NaO $_2$  [M+Na] $^{+}$  303.1361; found 303.1359;  $[\alpha]_D^{20}$  = -35.3 (c 2.3, chloroform); Chiral HPLC: Chiralpak AD-H column, 90:10 (Hexane:*i*-PrOH), 1.0 ml/min, (94:6 e.r.), major: 24.25 min, minor: 27.31 min.

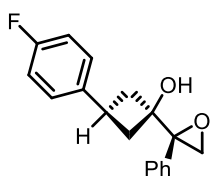

**(1s,3S)-3-(4-fluorophenyl)-1-[(R)-2-phenyloxiran-2-yl]cyclobutanol (3c).**

Following the general procedure A described above, the reaction was performed in THF (9.0 mL) using cyclobutanone **2c** (167 mg, 1.0 mmol), **1a** (122 mg, 1.0 mmol), TMEDA (460 $\mu$ L, 3.0 mmol), *s*-BuLi (1.4M, 950 $\mu$ L, 1.3 mmol), -98 $^{\circ}$  C. The crude product was purified by flash chromatography using hexanes-diethyl ether 10:1-1:1 as eluents. Colorless oil (72%); FT-IR  $\nu_{\max}$  (cm $^{-1}$ ): 3435, 2980, 2934, 1509, 1246, 1221, 1157, 1079, 1022, 933, 830, 764, 699;  $^1\text{H}$  NMR (500 MHz, CDCl $_3$ )  $\delta$ : 7.53-7.45 (m, 1H), 7.27 (dt,  $J$  = 6.9, 4.4 Hz, 2H), 7.04 (dd,  $J$  = 8.5, 5.5 Hz, 1H), 6.86 (t,  $J$  = 8.7 Hz, 1H), 3.15 (d,  $J$  = 5.1 Hz, 1H), 2.77 (d,  $J$  = 5.1 Hz, 1H), 2.75-2.66 (m, 2H), 2.38 (s, 1H), 2.17-2.08 (m, 1H), 2.03 (td,  $J$  = 7.5, 3.7 Hz, 1H);  $^{13}\text{C}$  NMR (126 MHz, CDCl $_3$ )  $\delta$ : 161.2 (d,  $J$  = 244 Hz), 140.6 (d,  $J$  = 3.15 Hz), 136.7, 128.1, 128.0, 127.9, 127.8, 127.7, 114.9 (d,  $J$  = 21 Hz), 72.1, 62.3, 51.3, 40.7, 40.8, 29.2; HRMS (ESI-TOF)  $m/z$ : calculated for C $_{18}$ H $_{17}$ FNaO $_2$  [M+Na] $^{+}$  307.1110; found 307.1142;  $[\alpha]_D^{20}$  = -13.7 (c 1.5, chloroform); Chiral HPLC: Chiralpak AS-H column, 95:5 (Hexane:*i*-PrOH), 1.0 ml/min, (96:4 e.r.), major: 23.97 min, minor: 21.51 min.

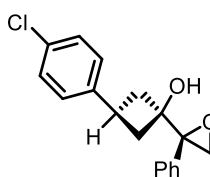

**(1s,3S)-3-(4-chlorophenyl)-1-[(R)-2-phenyloxiran-2-yl]cyclobutanol (3d).**

Following the general procedure A described above, the reaction was performed in THF (9.0 mL) using cyclobutanone **2d** (180 mg, 1.0 mmol), **1a** (122 mg, 1.0 mmol), TMEDA (460 $\mu$ L, 3.0 mmol), *s*-BuLi (1.4M, 950 $\mu$ L, 1.3 mmol), -98 $^{\circ}$  C. The crude product was purified by flash chromatography using hexanes-diethyl ether 10:1-1:1 as eluents. Colourless oil (88%); IR  $\nu_{\max}$  (cm $^{-1}$ ): 3434, 2981, 2928, 2839, 1479, 1445, 1249, 1164, 1023, 937, 758, 693;  $^1\text{H}$  NMR (500 MHz, CDCl $_3$ )  $\delta$ : 7.63-7.53 (m, 2H), 7.42-7.32 (m, 3H), 7.24 (dd,  $J$  = 12.7, 4.4 Hz, 2H), 7.11 (d,  $J$  = 8.3 Hz, 1H), 3.24 (d,  $J$  = 5.1 Hz, 1H), 2.87 (d,  $J$  = 5.1 Hz, 1H), 2.80 (dq,  $J$  = 8.1, 4.0 Hz, 2H), 2.28-2.18 (m, 1H), 2.17-2.05 (m, 1H), 1.58 (s, 1H), 0.85 (ddd,  $J$  = 9.7, 4.6, 2.7 Hz, 1H);  $^{13}\text{C}$  NMR (126 MHz, CDCl $_3$ )  $\delta$ : 143.4, 136.7, 131.6, 128.3, 128.1, 128.1, 127.9, 127.7, 72.1, 62.4, 51.3, 40.6, 40.5, 29.3; HRMS (ESI-TOF)  $m/z$ : calculated for C $_{18}$ H $_{17}$ ClNaO $_2$  [M+Na] $^{+}$  323.0815; found 323.0821;  $[\alpha]_D^{20}$  = -18.1 (c 1.4, chloroform); Chiral HPLC: Chiralpak AS-H column, 90:10 (Hexane:*i*-PrOH), 1.0 ml/min, (97:3 e.r.), major: 20.02 min, minor: 18.89 min.

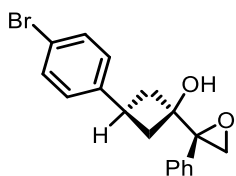

**(1s,3S)-3-(4-bromophenyl)-1-[(R)-2-phenyloxiran-2-yl]cyclobutanol**

**(3e).** Following the general procedure A described above, the reaction was performed in THF (9.0 mL) using cyclobutanone **2e** (224 mg, 1.0 mmol), **1a** (122 mg, 1.0 mmol), TMEDA (460 $\mu$ L, 3.0 mmol), *s*-BuLi (1.4M, 950 $\mu$ L, 1.3 mmol), -98 $^{\circ}$  C. The crude product was purified by

flash chromatography using hexanes-diethyl ether 10:1-1:1 as eluents. Colorless oil (80%); FT-IR(film)  $\nu_{\max}$  (cm $^{-1}$ ): 3434, 2984, 2924, 2856, 1494, 1461, 1250, 1189, 1024, 930, 755, 676;  $^1\text{H}$  NMR (500 MHz, CDCl $_3$ )  $\delta$ : 7.61-7.51 (m, 1H), 7.43-7.29 (m, 3H), 7.04 (d,  $J$  = 8.4 Hz, 1H), 3.23 (d,  $J$  = 5.1 Hz, 1H), 2.84 (t,  $J$  = 7.5 Hz, 1H), 2.82-2.69 (m, 2H), 2.27-2.16 (m, 1H), 2.16-2.03 (m, 1H);  $^{13}\text{C}$  NMR (126 MHz, CDCl $_3$ )  $\delta$ : 143.9, 136.7, 131.2, 128.3, 128.1, 128.1, 127.7, 119.6, 72.1, 62.3, 51.3, 40.5, 40.5, 29.4; HRMS (ESI-TOF)  $m/z$ : calculated for C $_{18}$ H $_{17}$ BrNaO $_2$  [M+Na] $^{+}$  367.0310; found 367.0313;  $[\alpha]_D^{20}$  = -19.0 (c 2.0 chloroform); Chiral HPLC: Chiralpak AS-H column, 95:5 (Hexane:*i*-PrOH), 1.0 ml/min, (99:1 e.r.), major: 24.93 min, minor: 23.74 min.

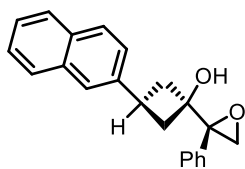

**(1s,3S)-3-(naphthalen-2-yl)-1-[(R)-2-phenyloxiran-2-yl]cyclobutanol**

**(3f).** Following the general procedure A described above, the reaction was performed in THF (9.0 mL) using cyclobutanone **2f** (196 mg, 1.0 mmol), **1a** (122 mg, 1.0 mmol), TMEDA (460 $\mu$ L, 3.0 mmol), *s*-BuLi (1.4M, 950 $\mu$ L, 1.3 mmol), -98 $^{\circ}$  C. The crude product was purified by

flash chromatography using hexanes-diethyl ether 10:1-1:1 as eluents. White solid (72%); mp = 76-78  $^{\circ}$ C; FT-IR(film)  $\nu_{\max}$  (cm $^{-1}$ ): 3437, 3054, 2981, 2936, 1633, 1601, 1496, 1447, 1246, 1212, 1093, 1023, 933, 854, 820, 748, 702;  $^1\text{H}$  NMR (500 MHz, CDCl $_3$ )  $\delta$  7.78 (t like,  $J$  = 9 Hz, 3H), 7.63 (d,  $J$  = 7 Hz, 2H), 7.60 (s, 1H), 7.47-7.33 (m, 6H), 3.31-3.29 (m, 1H), 3.0 (p,  $J$  = 9 Hz, 1H), 2.93-2.84 (m, 3H), 2.40 (t,  $J$  = 11 Hz, 1H), 2.33 (s, br OH), 2.29 (t,  $J$  = 11 Hz, 1H);  $^{13}\text{C}$  NMR (126 MHz CDCl $_3$ )  $\delta$  142.5, 137.0, 133.5, 132.2, 128.3 $_4$ , 128.3 $_0$ , 128.2, 128.0, 127.7 $_1$ , 127.6 $_7$ , 126.2, 125.5, 125.4, 124.7, 72.4, 62.7, 51.6, 40.8, 40.7, 30.1; HRMS (ESI-TOF)  $m/z$ : calculated for C $_{22}$ H $_{20}$ NaO $_2$  [M+Na] $^{+}$  339.1356; found 339.1364;  $[\alpha]_D^{20}$  = -36.0 (c 1.0, chloroform); Chiral HPLC: Chiralpak AD-H column, 90:10 (Hexane:*i*-PrOH), 1.0 ml/min, (96:4 e.r.), major: 26.49 min, minor: 19.11 min.

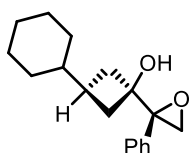

**(1s,3S)-3-cyclohexyl-1-[(R)-2-phenyloxiran-2-yl]cyclobutanol** **(3g).**

Following the general procedure A described above, the reaction was performed in THF (9.0 mL) using cyclobutanone **2g** (152 mg, 1.0 mmol), **1a** (122 mg, 1.0 mmol), TMEDA (460 $\mu$ L, 3.0 mmol), *s*-BuLi (1.4M, 950 $\mu$ L, 1.3

mmol), -98 $^{\circ}$  C. The crude product was purified by flash chromatography using hexanes-diethyl ether 10:1-1:1 as eluents. Colorless oil (89 %); FT-IR  $\nu_{\max}$  (cm $^{-1}$ ): 3427, 2919, 2848, 1767, 1447, 1285, 1205, 1022, 933, 909, 755;  $^1\text{H}$  NMR (500 MHz, CDCl $_3$ )  $\delta$ : 7.37-7.20 (m, 1H), 3.84 (dd,  $J$  = 3.9, 2.7 Hz, 1H), 3.12 (dd,  $J$  = 5.5, 4.1 Hz, 1H), 3.06-2.97 (m, 1H), 2.78 (dd,  $J$  = 5.5, 2.6 Hz, 1H), 2.75-2.68 (m, 1H), 1.79-1.71 (m, 1H), 1.68 (ddd,  $J$  = 10.7, 4.5, 2.7 Hz, 1H), 1.27-1.11 (m, 1H), 0.97-0.85 (m, 1H);  $^{13}\text{C}$  NMR (126 MHz, CDCl $_3$ )  $\delta$ : 137.55, 128.3, 128.0, 125.4, 109.8, 52.2, 51.0, 50.6, 43.5, 30.7, 29.8, 26.1, 25.9; HRMS (ESI-TOF)  $m/z$ : calculated for C $_{18}$ H $_{24}$ NaO $_2$  [M+Na] $^{+}$  295.1674; found 295.1687;  $[\alpha]_D^{20}$  = -18.4 (c 1.0, chloroform); Chiral HPLC: Chiralpak AD-H column, 90:10 (Hexane:*i*-PrOH), 1.0 ml/min, (99:1 e.r.), major: 24.09 min, minor: 32.55 min.

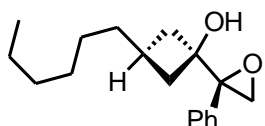

**(1*r*,3*S*)-3-hexyl-1-[(*R*)-2-phenyloxiran-2-yl]cyclobutanol (3h).**

Following the general procedure A described above, the reaction was performed in THF (9.0 mL) using cyclobutanone **2h** (154 mg, 1.0 mmol), **1a** (122 mg, 1.0 mmol), TMEDA (460  $\mu$ L, 3.0 mmol), *s*-BuLi (1.4M, 950  $\mu$ L, 1.3 mmol), -98° C. The crude product was purified by flash chromatography using hexanes-diethyl ether 10:1-1:1 as eluents. Inseparable mixture of diastereomers (80:20), analytical data refer to the major diastereomer. Colourless oil (94%); FT-IR  $\nu_{\text{max}}$  (cm<sup>-1</sup>): 3436, 2957, 2924, 2853, 1496, 1448, 1248, 1190, 1024, 933, 757, 701; <sup>1</sup>H NMR (600 MHz, CDCl<sub>3</sub>)  $\delta$ : 7.52 (d, *J* = 7 Hz, 2H), 7.37-7.30 (m, 3H), 3.17 (d, *J* = 5 Hz, 1H), 2.80 (d, *J* = 5 Hz, 1H), 2.46 (dd, *J* = 13, 8 Hz, 2H), 1.72-1.67 (m, 1H), 1.64-1.59 (m, 1H), 1.58-1.52 (m, 1H), 1.38 (dd, *J* = 15, 7 Hz, 2H), 1.28-1.24 (m, 2H), 1.23-1.18 (m, 4H), 1.17-1.11 (m, 2H), 0.86 (t, *J* = 7 Hz, 3H); <sup>13</sup>C NMR (126 MHz, CDCl<sub>3</sub>)  $\delta$ : 137.2, 128.1, 128.1, 128.0, 73.0, 62.7, 51.5, 39.2, 39.0, 37.6, 32.0, 29.3, 27.3, 25.6, 22.7, 14.2; HRMS (ESI-TOF) *m/z*: calculated for C<sub>18</sub>H<sub>26</sub>NaO<sub>2</sub> [M+Na]<sup>+</sup> 297.1825; found 297.1837.

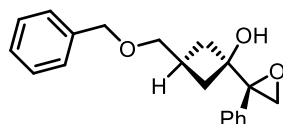

**(1*s*,3*S*)-3-(benzyloxymethyl)-1-[(*R*)-2-phenyloxiran-2-yl]cyclobutanol (3i).**

Following the general procedure A described above, the reaction was performed in THF (9.0 mL) using cyclobutanone **2i** (190 mg, 1.0 mmol), **1a** (122 mg, 1.0 mmol), TMEDA (460  $\mu$ L, 3.0 mmol), *s*-BuLi (1.4M, 950  $\mu$ L, 1.3 mmol), -98° C. The crude product was purified by flash chromatography using hexanes-diethyl ether 10:1-1:1 as eluents. Colourless oil (90%); FT-IR  $\nu_{\text{max}}$  (cm<sup>-1</sup>): 3421, 2932, 2853, 1495, 1452, 1246, 1207, 1087, 1026, 935, 755, 697; <sup>1</sup>H NMR (500 MHz, CDCl<sub>3</sub>)  $\delta$ : 7.52 (dd, *J* = 8.0, 1.3 Hz, 1H), 7.39-7.19 (m, 4H), 4.52 (s, 1H), 3.54-3.38 (m, 2H), 3.06 (d, *J* = 5.2 Hz, 1H), 2.77 (d, *J* = 5.2 Hz, 1H), 2.55-2.45 (m, 1H), 2.17-2.03 (m, 1H), 1.93-1.81 (m, 1H), 1.80-1.68 (m, 1H), 1.34-1.19 (m, 1H), 0.94-0.82 (m, 1H); <sup>13</sup>C NMR (126 MHz, CDCl<sub>3</sub>)  $\delta$ : 137.9, 137.1, 127.8, 127.6, 127.6, 127.6, 74.3, 73.4, 73.1, 61.7, 51.3, 35.7, 34.6, 31.50, 25.9, 22.5, 14.0; HRMS (ESI-TOF) *m/z*: calculated for C<sub>20</sub>H<sub>22</sub>NaO<sub>3</sub> [M+Na]<sup>+</sup> 333.1467; found 333.1490; [ $\alpha$ ]<sub>D</sub><sup>20</sup> = -22.3 (c 1.1, chloroform); Chiral HPLC: Phenomenex-Lux 1 column, 90:10 (Hexane:*i*-PrOH), 1.0 ml/min, (99:1 e.r.), major: 22.15 min, minor: 27.39 min.

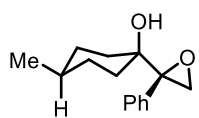

**(1*s*,4*S*)-4-methyl-1-[(*R*)-2-phenyloxiran-2-yl]cyclohexanol (3j).**

Following the general procedure A described above, the reaction was performed in THF (9.0 mL) using cyclohexanone **2j** (112 mg, 1.0 mmol), **1a** (122 mg, 1.0 mmol), TMEDA (460  $\mu$ L, 3.0 mmol), *s*-BuLi (1.4M, 950  $\mu$ L, 1.3 mmol), -98° C. The crude product was purified by flash chromatography using hexanes-diethyl ether 10:1-1:1 as eluents. Inseparable mixture of diastereomers (85:15), analytical data refer to the major diastereomer. Colourless oil (90%); FT-IR(film)  $\nu_{\text{max}}$  (cm<sup>-1</sup>): 3428, 2958, 2864, 1492, 1480, 1362, 1226, 1149, 1115, 1084, 930, 755, 696; <sup>1</sup>H NMR (500 MHz, CDCl<sub>3</sub>)  $\delta$ : 7.43-7.41 (m, 2H), 7.34-7.29 (m, 3H), 3.33 (d, *J* = 5.5 Hz, 1H), 2.71 (d, *J* = 5.5 Hz, 1H), 2.20 (br.s, 1H), 1.86-1.79 (m, 3H), 1.62-1.55 (m, 1H), 1.29-1.24 (m, 1H), 1.23-1.21 (m, 2H), 0.76 (d, *J* = 7.0 Hz, 3H); <sup>13</sup>C NMR (126 MHz, CDCl<sub>3</sub>)  $\delta$ : 137.9, 137.1, 128.4, 127.7, 71.2, 66.5, 50.6, 50.5, 29.0, 28.5, 27.3, 26.9, 17.3; HRMS (ESI-TOF) *m/z*: calculated for C<sub>15</sub>H<sub>20</sub>NaO<sub>2</sub> [M+Na]<sup>+</sup> 255.1361; found 255.1362; [ $\alpha$ ]<sub>D</sub><sup>20</sup> = -37.5 (c 0.6, chloroform); Chiral HPLC: Phenomenex-Lux 1 column, 95:5 (Hexane:*i*-PrOH), 1.0 ml/min, (97:3 e.r.), major: 22.02 min, minor: 27.13 min.

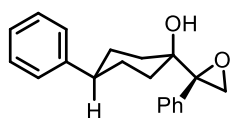

**(1s,4S)-4-phenyl-1-[(R)-2-phenyloxiran-2-yl]cyclohexanol (3k).**

Following the general procedure A described above, the reaction was performed in THF (9.0 mL) using cyclohexanone **2k** (174 mg, 1.0 mmol), **1a** (122 mg, 1.0 mmol), TMEDA (460  $\mu$ L, 3.0 mmol), *s*-BuLi (1.4M, 950  $\mu$ L, 1.3 mmol), -98° C. The crude product was purified by flash chromatography using hexanes-diethyl ether 10:1-1:1 as eluents. Colourless oil (88%); FT-IR (film) $\nu_{\text{max}}$  (cm<sup>-1</sup>): 3460, 2927, 2860 1493, 1448, 1265, 1069, 1025, 962, 942, 752, 736, 698; <sup>1</sup>H NMR (500 MHz, CDCl<sub>3</sub>)  $\delta$ : 7.37 (dd, *J* = 7.5, 1.8 Hz, 1H), 7.26-7.18 (m, 2H), 7.15 (dd, *J* = 14.7, 7.3 Hz, 2H), 7.10-7.03 (m, 2H), 3.22 (d, *J* = 5.2 Hz, 1H), 2.68 (d, *J* = 5.2 Hz, 1H), 2.67-2.61 (m, 1H), 2.43-2.38 (m, 1H), 1.99 (s, 1H), 1.85 (ddd, *J* = 29.9, 11.6, 3.8 Hz, 2H), 1.79-1.65 (m, 2H), 1.63 (d, *J* = 12.3 Hz, 1H), 1.50-1.38 (m, 1H); <sup>13</sup>C NMR (126 MHz, CDCl<sub>3</sub>)  $\delta$ : 145.3, 137.9, 128.5, 128.3, 128.1, 127.7, 127.7, 126.9, 126.6, 126.5, 125.6, 71.8, 65.6, 51.1, 41.2, 39.8, 33.8, 33.1, 32.7, 28.4, 28.1; HRMS (ESI-TOF) *m/z*: calculated for C<sub>20</sub>H<sub>22</sub>NaO<sub>2</sub> [M+Na]<sup>+</sup> 317,1517; found 317,1538; [ $\alpha$ ]<sub>D</sub><sup>20</sup> = -21.2 (c 2.2, chloroform); Chiral HPLC: phenomenex-Lux 1 column, 90:10 (Hexane:*i*-PrOH), 1.0 ml/min, (98:2 e.r.), major: 30.23 min, minor: 40.38 min.

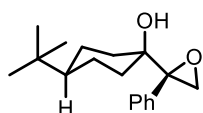

**(1s,4S)-4-tert-butyl-1-[(R)-2-phenyloxiran-2-yl]cyclohexanol (3l).**

Following the general procedure A described above, the reaction was performed in THF (9.0 mL) using cyclohexanone **2l** (112 mg, 1.0 mmol), **1a** (122 mg, 1.0 mmol), TMEDA (460  $\mu$ L, 3.0 mmol), *s*-BuLi (1.4M, 950  $\mu$ L, 1.3 mmol), -98° C. The crude product was purified by flash chromatography using hexanes-diethyl ether 10:1-1:1 as eluents. White solid (93%), mp = 64-65° C; FT-IR(film) $\nu_{\text{max}}$  (cm<sup>-1</sup>): 3426, 2954, 2865, 1492, 1444, 1364, 1230, 1188, 1117, 1076, 937, 905, 754, 697; <sup>1</sup>H NMR (500 MHz, CDCl<sub>3</sub>)  $\delta$ : 7.43 (dd, *J* = 7.9, 1.3 Hz, 2H), 7.24 (tt, *J* = 8.5, 4.4 Hz, 3H), 3.21 (d, *J* = 5.1 Hz, 1H), 2.74 (d, *J* = 5.1 Hz, 1H), 1.98 (br.s, 1H), 1.82 (ddd, *J* = 13.3, 6.2, 3.3 Hz, 1H), 1.75 (ddd, *J* = 13.3, 6.2, 3.3 Hz, 1H), 1.59-1.50 (m, 1H), 1.50-1.44 (m, 1H), 1.31 (ddd, *J* = 17.0, 8.7, 2.1 Hz, 2H), 1.19-1.06 (m, 2H), 0.98 (tt, *J* = 11.6, 3.4 Hz, 1H), 0.74 (s, 9H); <sup>13</sup>C NMR (126 MHz, CDCl<sub>3</sub>)  $\delta$ : 138.5, 128.3, 127.7, 127.7, 64.9, 51.8, 46.5, 35.8, 35.6, 32.2, 27.5, 24.0, 23.9; HRMS (ESI-TOF) *m/z*: calculated for C<sub>18</sub>H<sub>26</sub>NaO<sub>2</sub> [M+Na]<sup>+</sup> 297,1830; found 297.1837; [ $\alpha$ ]<sub>D</sub><sup>20</sup> = -33.7 (c 1.7, chloroform); Chiral HPLC: Phenomenex-Lux 1 column, 90:10 (Hexane:*i*-PrOH), 1.0 ml/min, (99:1 e.r.), major: 43.07 min, minor: 39.23 min.

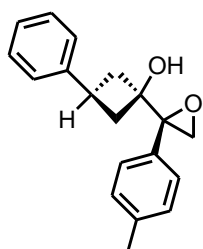

**(1s,3S)-1-[(R)-3-phenyl-1-(2-p-tolyl-oxiranyl)-cyclobutanol (3ab).**

Following the general procedure A described above, the reaction was performed in THF (9.0 mL) using cyclobutanone **2a** (146 mg, 1.0 mmol), **1b** (134 mg, 1.0 mmol), TMEDA (460  $\mu$ L, 3.0 mmol), *s*-BuLi (1.4M, 950  $\mu$ L, 1.3 mmol), -98° C. The crude product was purified by flash chromatography using hexanes-diethyl ether 10:1-1:1 as eluents. Colorless oil (66%); <sup>1</sup>H NMR (600 MHz, CDCl<sub>3</sub>)  $\delta$ : 7.39 (d, *J* = 8.1 Hz, 2H), 7.23-7.17 (m, 2H), 7.11 (dd, *J* = 13.0, 5.7 Hz, 5H), 3.17 (d, *J* = 5.1 Hz, 1H), 2.78 (d, *J* = 5.1 Hz, 1H), 2.76-2.72 (m, 2H), 2.29 (s, 3H), 2.28 (d, *J* = 2.6 Hz, 1H), 2.21 (t, *J* = 4.9 Hz, 1H), 2.12-2.07 (m, 1H); <sup>13</sup>C NMR (126 MHz CDCl<sub>3</sub>)  $\delta$ : 145.0, 137.8, 133.8, 128.8, 128.2, 127.7, 126.5, 125.9, 72.1, 62.4, 51.4, 40.6, 40.5, 29.8, 21.1; HRMS (ESI-TOF) *m/z*: calculated for C<sub>19</sub>H<sub>20</sub>NaO<sub>2</sub> [M+Na]<sup>+</sup> 303,1361; found 303,1369; [ $\alpha$ ]<sub>D</sub><sup>20</sup> = -29.6 (c 1.1, chloroform); Chiral HPLC: Phenomenex-Lux 1 column, 90:10 (Hexane:*i*-PrOH), 1.0 ml/min, (94:6 e.r.), major: 20.45 min, minor: 23.02 min.

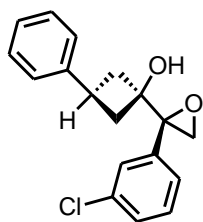

**(1s,3S)-1-[(R)-(3-Chloro-phenyl)-oxiranyl]-3-phenyl-cyclobutanol**

**(3ad).** Following the general procedure A described above, the reaction was performed in THF (9.0 mL) using cyclobutanone **2a** (146 mg, 1.0 mmol), **1d** (154 mg, 1.0 mmol), TMEDA (460  $\mu$ L, 3.0 mmol), *s*-BuLi (1.4M, 950  $\mu$ L, 1.3 mmol), -98° C. The crude product was purified by flash chromatography using hexanes-diethyl ether 10:1-1:1 as eluents. Colorless oil (62%); FT-IR(film)  $\nu_{\text{max}}$  ( $\text{cm}^{-1}$ ): 3435,

2985, 2918, 2850, 1599, 1422, 1265, 1151, 1095, 932, 741, 698;  $^1\text{H}$  NMR (500 MHz,  $\text{CDCl}_3$ )  $\delta$ : 7.61-7.60 (m, 1H), 7.52-7.49 (m, 1H), 7.34-7.28 (m, 4H), 7.21-7.17 (m, 3H), 3.24 (d,  $J$  = 5.1 Hz, 1H), 2.97-2.90 (m, 1H), 2.85 (d,  $J$  = 5.0 Hz, 1H), 2.80-2.74 (m, 1H), 2.30-2.24 (m, 1H), 2.24 (br. s, 1H), 2.17-2.13 (m, 1H);  $^{13}\text{C}$  NMR (126 MHz,  $\text{CDCl}_3$ )  $\delta$ : 144.8, 139.2, 134.2, 129.5, 128.4, 128.4, 127.9, 126.6, 126.2, 126.0, 72.6, 61.7, 51.6, 41.0, 40.8, 29.9; HRMS (ESI-TOF)  $m/z$ . calculated for  $\text{C}_{18}\text{H}_{16}\text{ClO}_2$   $[\text{M}-\text{H}]^-$  299.0839; found 299.0835;  $[\alpha]_{\text{D}}^{20}$  = -10.9 (c 1.0, chloroform); Chiral HPLC: Phenomenex-Lux 1 column, 90:10 (Hexane:*i*-PrOH), 1.0 ml/min, (91:9 e.r.), major: 14.48 min, minor: 13.80 min.

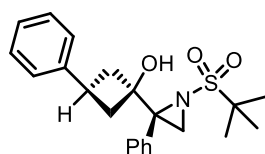

**(1s\*,3S\*)-1-[(R\*)-1-(tert-butylsulfonyl)-2-phenylaziridin-2-yl]-3-phenylcyclobutanol (6).**

Following the general procedure B described above, the reaction was performed in THF (9.0 mL) using cyclobutanone **2a** (146 mg, 1.0 mmol), **1b** (239 mg, 1.0 mmol),

TMEDA (460  $\mu$ L, 3.0 mmol), *s*-BuLi (1.4M, 950  $\mu$ L, 1.3 mmol), -98° C. The crude product was purified by flash chromatography using hexanes-diethyl ether 1:1 as eluents. Deliquescent white solid (68%);  $^1\text{H}$  NMR (600 MHz,  $\text{CDCl}_3$ )  $\delta$ : 7.56-7.54 (m, 1H), 7.37-7.26 (m, 3H), 7.24-7.15 (m, 2H), 7.11 (dd,  $J$  = 16.3, 7.6 Hz, 2H), 3.14 (br. s, 1H), 2.98-2.90 (m, 1H), 2.89-2.80 (m, 2H), 2.71 (ddd,  $J$  = 13.4, 8.8, 4.8 Hz, 1H), 2.23 (dd,  $J$  = 12.4, 9.3 Hz, 1H), 2.16 (dd,  $J$  = 12.2, 9.2 Hz, 1H), 1.43 (s, 9H);  $^{13}\text{C}$  NMR (126 MHz  $\text{CDCl}_3$ )  $\delta$ : 144.6, 128.2, 127.8, 126.5, 126.0, 72.6, 61.4, 40.9, 40.5, 39.4, 30.1, 24.1; HRMS (ESI-TOF)  $m/z$  calculated for  $\text{C}_{22}\text{H}_{27}\text{NNaO}_3\text{S}$   $[\text{M}+\text{Na}]^+$  408,1609; found 408,1612.



### 3. Optimization study of Payne rearrangement

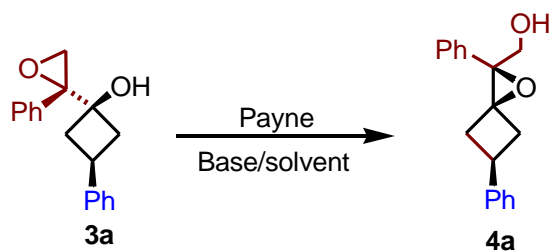

Table 1. Payne rearrangement base screening

| Entry | Base          | Solvent                         | Temp./°C | Conversion |
|-------|---------------|---------------------------------|----------|------------|
| 1     | KOH           | <i>t</i> -BuOH                  | r.t.     | 93%        |
| 2     | KOH           | <i>i</i> -PrOH                  | r.t.     | 96%        |
| 3     | KOH           | EtOH                            | r.t.     | 42%        |
| 4     | NaOH          | <i>i</i> -PrOH                  | r.t.     | 92%        |
| 5     | LiOH          | <i>i</i> -PrOH                  | r.t.     | 75%        |
| 6     | DBU           | CH <sub>2</sub> Cl <sub>2</sub> | 0°C      | 24%        |
| 7     | DBU           | CH <sub>2</sub> Cl <sub>2</sub> | r.t.     | 37%        |
| 8     | DBU           | THF                             | r.t.     | 41%        |
| 9     | DABCO         | CH <sub>2</sub> Cl <sub>2</sub> | r.t.     | 33%        |
| 10    | KOH (1,5 eq.) | <i>i</i> -PrOH                  | r.t.     | 98%        |
| 11    | KOH (2,0 eq.) | <i>i</i> -PrOH                  | r.t.     | 99%        |
| 12    | KOH (3,0 eq.) | <i>i</i> -PrOH                  | r.t.     | 94%        |

4. General procedure for the synthesis of oxaspiroalkanes **4a-k**, **4ab**, **4ad** and ( $\pm$ )-azaspirooctane **7**.

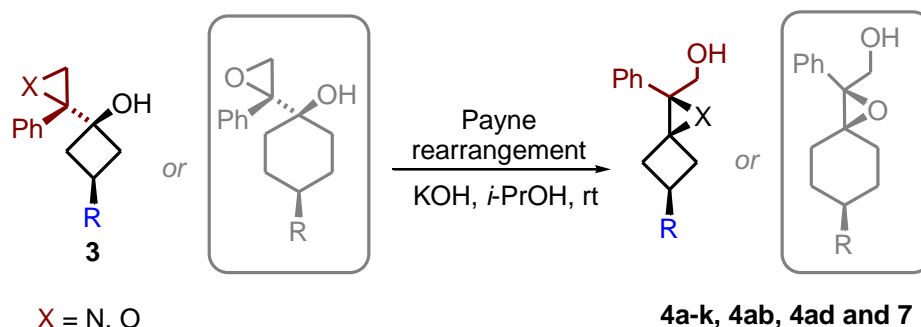

To a stirred solution of 2-phenyloxiranyl-cycloalkanol **3** (or azaspiro-cycloalkanol **6**) (0.37 mmol) in *i*-PrOH (5 mL), KOH (31 mg, 0.55 mmol) was added and the reaction mixture stirred for 4 h at r.t. The reaction mixture was diluted with a saturated solution of  $\text{NH}_4\text{Cl}$  (10 mL) and extracted with  $\text{Et}_2\text{O}$  ( $3 \times 10$  mL). The organic phase was dried on  $\text{Na}_2\text{SO}_4$ , filtered and concentrated under reduced pressure. Purification by  $\text{SiO}_2$  flash chromatography (hexanes-diethyl ether 10:1-1:1 as eluents) gave the substituted oxaspiro-adducts **4a-k** and **7** as reported below.

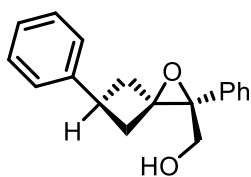

**[(2S,3s,5R)-2,5-diphenyl-1-oxaspiro[2.3]hexan-2-yl]methanol (4a).**

Following the general procedure described above, the reaction was performed in *i*-PrOH (5.0 mL) KOH (31 mg, 0.55 mmol), **3a** (100 mg, 0.37 mmol), rt. The crude product was purified by flash chromatography using hexanes-diethyl ether 10:1-1:1 as eluents.

Colourless oil (98%); FT-IR (film) $\nu_{\text{max}}$  ( $\text{cm}^{-1}$ ): 3456, 3060, 3027, 2930, 1736, 1603, 1496, 1448, 1030, 1010, 905, 753, 698;  $^1\text{H}$  NMR (600 MHz,  $\text{CDCl}_3$ )  $\delta$ : 7.43-7.36 (m, 4H), 7.36-7.30 (m, 3H), 7.27 (d,  $J = 7$  Hz, 2H), 7.22 (t,  $J = 8$  Hz, 1H), 4.30-4.24 (m, 1H), 4.01 (dd,  $J = 12, 6$  Hz, 1H), 3.28 (p,  $J = 9$  Hz, 1H), 3.03-2.97 (m, 1H), 2.73 (dd,  $J = 13, 9$  Hz, 1H), 2.50 (dd,  $J = 13, 9$  Hz, 1H), 2.32-2.25 (m, 1H);  $^{13}\text{C}$  NMR (151 MHz  $\text{CDCl}_3$ )  $\delta$ : 144.6, 136.5, 128.6<sub>o</sub>, 128.5<sub>8</sub>, 128.0, 126.6, 126.4<sub>5</sub>, 126.4<sub>1</sub>, 66.9, 66.7, 64.0, 37.5, 37.1, 31.5; HRMS (ESI-TOF)  $m/z$ : calculated for  $\text{C}_{18}\text{H}_{18}\text{NaO}_2$   $[\text{M}+\text{Na}]^+$  289.1199; found 289.1208;  $[\alpha]_{\text{D}}^{20} = -45.0$  (c 1.0, chloroform); Chiral HPLC: Phenomenex-Lux 1 column, 90:10 (Hexane:*i*-PrOH), 1.0 ml/min, (99:1 e.r.), major: 11.91 min, minor: 16.56.

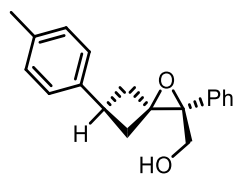

**[(2S,3s,5R)-2-Phenyl-5-(*p*-tolyl)-1-oxaspiro[2.3]hexan-2-yl]methanol (4b).**

Following the general procedure described above, the reaction was performed in *i*-PrOH (5.0 mL) KOH (29 mg, 0.52 mmol), **3b** (100 mg, 0.35 mmol), rt. The crude product was purified by flash chromatography using hexanes-diethyl ether 10:1-1:1 as eluents.

Colourless oil (92%); FT-IR (film) $\nu_{\text{max}}$  ( $\text{cm}^{-1}$ ): 3454, 3061, 3024, 2927, 1734, 1609, 1488, 1446, 1029, 1012, 905, 696;  $^1\text{H}$  NMR (400 MHz,  $\text{CDCl}_3$ )  $\delta$ : 7.477.27 (m, 5H), 7.21-7.05 (m, 4H), 4.25 (dd,  $J = 12.1, 4.6$  Hz, 1H), 4.01 (dd,  $J = 12.2, 7.0$  Hz, 1H), 3.23 (p,  $J = 8.7$  Hz, 1H), 3.05-2.83 (m, 1H), 2.69 (dd,  $J = 12.9, 9.1$  Hz, 1H), 2.46 (dd,  $J = 12.4, 9.6$  Hz, 1H), 2.32 (s, 3H), 2.25 (ddd,  $J = 15.9, 8.6, 4.2$  Hz, 1H), 1.93 (br.s, 3H), 1.79-1.58 (m, 1H);  $^{13}\text{C}$  NMR (101 MHz,  $\text{CDCl}_3$ )  $\delta$ : 141.4, 136.3, 135.8, 129.02, 128.4, 127.8, 126.3, 126.2, 66.7,

66.5, 63.9, 37.4, 37.0, 31.0, 20.9; HRMS (ESI-TOF)  $m/z$ : calculated for  $C_{18}H_{17}BrNaO_2$   $[M+Na]^+$  303,1361; found 303,1355;  $[\alpha]_D^{20} = -20.0$  (cc 1.0, chloroform); Chiral HPLC: Phenomenex-Lux 1 column, 90:10 (Hexane:*i*-PrOH), 1.0 ml/min, (97:3 e.r.), major: 37.25 min, minor: 32.88.

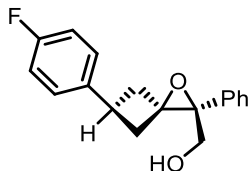

**(2S,3s,5R)-[5-(4-Fluorophenyl)-2-phenyl-1-oxaspiro[2.3]hexan-2-yl]methanol (4c).** Following the general procedure described above, the reaction was performed in *i*-PrOH (5.0 mL) KOH (29 mg, 0.51 mmol), **3c** (96 mg, 0.34 mmol), rt. The crude product was purified by flash chromatography using hexanes-diethyl ether 10:1-1:1 as

eluent. Colorless oil (90%); FT-IR (film) $\nu_{max}$  ( $cm^{-1}$ ): 3455, 3029, 2944, 1732, 1612, 1469, 1450, 1028, 1001, 908, 699;  $^1H$  NMR (500 MHz,  $CDCl_3$ )  $\delta$ : 7.35-7.20 (m, 5H), 7.15-7.08 (m, 2H), 6.90 (dd,  $J = 12.0, 5.4$  Hz, 2H), 4.15 (d,  $J = 12.3$  Hz, 1H), 3.92 (d,  $J = 12.3$  Hz, 1H), 3.16 (dd,  $J = 10.8, 6.7$  Hz, 1H), 2.90 (dddd,  $J = 12.9, 8.5, 4.1, 1.1$  Hz, 1H), 2.64-2.53 (m, 1H), 2.40-2.30 (m, 1H), 2.19 (dddd,  $J = 12.9, 8.6, 4.1, 1.1$  Hz, 1H), 1.81 (br.s, 1H);  $^{13}C$  NMR (126 MHz,  $CDCl_3$ )  $\delta$ : 161.2 (d,  $J = 243.8$  Hz), 141.2 (d,  $J = 3.2$  Hz), 139.3, 128.2, 128.0 (d,  $J = 5.3$  Hz), 127.9, 126.8, 114.95 (d,  $J = 21.2$  Hz), 79.0, 75.1, 49.9, 40.3, 39.8, 29.2; HRMS (ESI-TOF)  $m/z$ : calculated for  $C_{18}H_{17}FNaO_2$   $[M+Na]^+$  307.1110; found 307.1142;  $[\alpha]_D^{20} = -31.0$  (c 0.9, chloroform); Chiral HPLC: Phenomenex-Lux 1 column, 95:5 (Hexane:*i*-PrOH), 1.0 ml/min, (98:2 e.r.), major: 51.21 min, minor: 46.97.

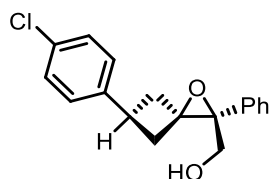

**(2S,3s,5R)-[5-(4-Chlorophenyl)-2-phenyl-1-oxaspiro[2.3]hexan-2-yl]methanol (4d).** Following the general procedure described above, the reaction was performed in *i*-PrOH (5.0 mL) KOH (31 mg, 0.55 mmol), **3d** (112 mg, 0.37 mmol), rt. The crude product was purified by flash chromatography using hexanes-diethyl ether 10:1-1:1 as eluent. Colorless oil (73%); FT-IR (film) $\nu_{max}$  ( $cm^{-1}$ ): 3447,

3023, 2945, 1689, 1482, 1446, 1025, 1014, 907, 654;  $^1H$  NMR (500 MHz,  $CDCl_3$ )  $\delta$ : 7.42-7.37 (m, 3H), 7.34 (dd,  $J = 11.5, 4.5$  Hz, 2H), 7.29-7.26 (m, 2H), 7.18 (d,  $J = 8.3$  Hz, 2H), 4.23 (d,  $J = 12.1$  Hz, 1H), 4.02 (d,  $J = 11.7$  Hz, 1H), 3.23 (dd,  $J = 17.5, 8.8$  Hz, 1H), 3.09-2.83 (m, 1H), 2.67 (dd,  $J = 13.1, 8.9$  Hz, 1H), 2.43 (dd,  $J = 13.1, 8.9$  Hz, 1H), 2.27 (ddd,  $J = 12.9, 8.6, 4.1$  Hz, 1H), 1.53 (br.s, 1H);  $^{13}C$  NMR (126 MHz,  $CDCl_3$ )  $\delta$ : 142.9, 136.2, 131.9, 128.5, 128.4, 127.8, 127.8, 126.2, 66.5, 66.5, 63.8, 37.4, 37.0, 30.8; HRMS (ESI-TOF)  $m/z$ : calculated for  $C_{18}H_{17}ClNaO_2$   $[M+Na]^+$  323.0815; found 323.0822;  $[\alpha]_D^{20} = -20.0$  (c 1.2, chloroform); Chiral HPLC: Phenomenex-Lux 1 column, 95:5 (Hexane:*i*-PrOH), 1.0 ml/min, (98:2 e.r.), major: 36.29 min, minor: 31.13.

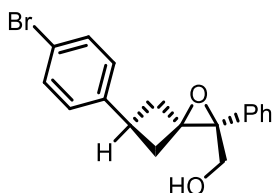

**[(2S,3s,5R)-5-(4-Bromophenyl)-2-phenyl-1-oxaspiro[2.3]hexan-2-yl]methanol (4e).** Following the general procedure described above, the reaction was performed in *i*-PrOH (4.0 mL) KOH (24 mg, 0.43 mmol), **3e** (100 mg, 0.29 mmol), rt. The crude product was purified by flash chromatography using hexanes-diethyl ether 10:1-1:1 as

eluent. Pale yellow oil (80%); FT-IR (film) $\nu_{max}$  ( $cm^{-1}$ ): 3456, 3061, 3025, 2930, 1736, 1614, 1494, 1448, 1031, 1010, 905, 698;  $^1H$  NMR (500 MHz,  $CDCl_3$ )  $\delta$ : 7.43 (d,  $J = 8.4$  Hz, 2H), 7.40-7.35 (m, 2H), 7.35-7.30 (m, 3H), 7.13 (d,  $J = 8.3$  Hz, 2H), 4.87 (d,  $J = 12.2$  Hz, 1H), 4.18 (d,  $J = 12.2$  Hz, 1H), 3.23 (dd,  $J = 17.4, 8.7$  Hz, 1H), 2.92 (ddd,  $J = 12.6, 8.6, 4.0$  Hz, 1H), 2.67 (dd,  $J = 12.9, 9.0$  Hz, 1H), 2.43 (dd,  $J = 13.1, 9.0$  Hz, 1H), 2.35-2.18 (m, 1H), 1.24 (dt,  $J = 9.9, 6.7$  Hz, 2H);  $^{13}C$  NMR (126 MHz,  $CDCl_3$ )  $\delta$ : 170.7, 143.2, 135.6, 128.3, 128.2, 127.9, 126.4, 120.1, 66.4, 65.9, 64.0, 37.0, 36.9, 30.8, 20.7; HRMS (ESI-TOF)  $m/z$ : calculated for  $C_{18}H_{17}BrNaO_2$   $[M+Na]^+$  367,0310; found 367,0308;

$[\alpha]_D^{20} = -33.0$  (c 1.2, chloroform); Chiral HPLC: Phenomenex-Lux 1 column, 95:5 (Hexane:*i*-PrOH), 1.0 ml/min, (99:1 e.r.), major: 40.43 min, minor: 34.11.

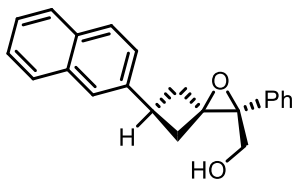

**[(2S,3s,5R)-5-(Naphthalen-2-yl)-2-phenyl-1-oxaspiro[2.3]hexan-2-yl]methanol (4f).** Following the general procedure described above, the reaction was performed in *i*-PrOH (4.0 mL) KOH (24 mg, 0.42 mmol), **3f** (90 mg, 0.28 mmol), rt. The crude product was purified by flash chromatography using hexanes-diethyl ether 10:1-1:1 as eluents. Pale yellow oil (72%); FT-IR (film) $\nu_{\max}$  ( $\text{cm}^{-1}$ ): 3455, 3052, 3027, 2932, 1734, 1612, 1489, 1445, 1028, 1012, 917, 699;  $^1\text{H}$  NMR (400 MHz,  $\text{CDCl}_3$ )  $\delta$ : 7.79 (t,  $J = 8.2$  Hz, 3H), 7.51–7.29 (m, 4H), 4.28 (d,  $J = 12.2$  Hz, 1H), 4.05 (d,  $J = 12.2$  Hz, 1H), 3.51–3.35 (m, 1H), 3.07 (ddd,  $J = 12.6, 11.6, 7.9$  Hz, 1H), 2.90–2.73 (m, 1H), 2.59 (dd,  $J = 12.4, 8.9$  Hz, 1H), 2.40–2.26 (m, 1H), 1.87 (s, 1H);  $^{13}\text{C}$  NMR (101 MHz,  $\text{CDCl}_3$ )  $\delta$ : 141.7, 136.3, 133.4, 132.1, 128.4, 128.2, 127.8, 127.6, 126.3, 126.1, 125.4, 125.1, 124.5, 66.8, 66.6, 63.8, 37.3, 36.9, 31.9, 31.5, 29.7; HRMS (ESI-TOF)  $m/z$ : calculated for  $\text{C}_{22}\text{H}_{20}\text{NaO}_2$   $[\text{M}+\text{Na}]^+$  339,1361; found 339,1355;  $[\alpha]_D^{20} = -53.0$  (c 1.0, chloroform); Chiral HPLC: Phenomenex-Lux 1 column, 95:5 (Hexane:*i*-PrOH), 1.0 ml/min, (97:3 e.r.), major: 29.12 min, minor: 39.43 min.

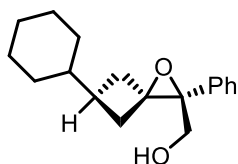

**[(2S,3s,5R)-5-Cyclohexyl-2-phenyl-1-oxa-spiro[2.3]hexan-2-yl]methanol (4g).** Following the general procedure described above, the reaction was performed in *i*-PrOH (5.0 mL) KOH (33 mg, 0.58 mmol), **3g** (106 mg, 0.39 mmol), rt. The crude product was purified by flash chromatography using hexanes-diethyl ether 10:1-1:1 as eluents. White solid (92%) mp: 55°C; FT-IR (film) $\nu_{\max}$  ( $\text{cm}^{-1}$ ): 3432, 2959, 2934, 2850, 1461, 1422, 1029, 910, 771, 735, 697;  $^1\text{H}$  NMR (500 MHz,  $\text{CDCl}_3$ )  $\delta$ : 7.33-7.26 (m, 2H), 7.25-7.17 (m, 3H), 4.13 (dd,  $J = 12.1, 4.0$  Hz, 1H), 3.85 (dd,  $J = 12.1, 6.6$  Hz, 1H), 2.48 (ddd,  $J = 12.8, 8.7, 3.7$  Hz, 1H), 2.12 (dd,  $J = 12.6, 9.0$  Hz, 1H), 1.88 (dd,  $J = 12.9, 8.5$  Hz, 1H), 1.83-1.72 (m, 1H), 1.69-1.52 (m, 6H), 1.50 (br.s, 1H), 1.20-0.98 (m, 4H), 0.70 (dt,  $J = 33.3, 12.0$  Hz, 2H);  $^{13}\text{C}$  NMR (126 MHz  $\text{CDCl}_3$ )  $\delta$ : 136.6, 128.2, 127.6, 126.2, 67.0, 66.4, 63.9, 44.6, 34.0, 33.6, 32.7, 30.3, 30.1, 26.4, 25.9, 25.9; HRMS (ESI-TOF)  $m/z$ : calculated for  $\text{C}_{18}\text{H}_{24}\text{NaO}_2$   $[\text{M}+\text{Na}]^+$  295,1674; found 295,1681;  $[\alpha]_D^{20} = -17.8$  (c 0.8, chloroform); Chiral HPLC: Phenomenex-Lux 1 column, 95:5 (Hexane:*i*-PrOH), 1.0 ml/min, (99:1 e.r.), major: 59.01 min, minor: 74.47 min.

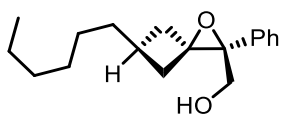

**[(2S,3s,5R)-5-Hexyl-2-phenyl-1-oxaspiro[2.3]hexan-2-yl]methanol (4h).** Following the general procedure described above, the reaction was performed in *i*-PrOH (5.0 mL) KOH (24 mg, 0.42 mmol), **3h** (78 mg, 0.28 mmol), rt. The crude product was purified by flash chromatography using hexanes-diethyl ether 10:1-1:1 as eluents. Colorless oil (80%); FT-IR (film) $\nu_{\max}$  ( $\text{cm}^{-1}$ ): 3436, 2957, 2924, 2853, 1459, 1419, 1041, 1028, 909, 761, 734, 700;  $^1\text{H}$  NMR (500 MHz,  $\text{CDCl}_3$ )  $\delta$  7.39-7.34 (m, 2H), 7.32-7.28 (m, 3H), 4.20 (dd,  $J = 12, 5$  Hz, 1H), 3.91 (dd,  $J = 12, 7$  Hz, 1H), 2.65-2.59 (m, 1H), 2.13 (dd,  $J = 13, 7$  Hz, 1H), 2.00-1.85 (m, 3H), 1.54-1.42 (m, 2H), 1.31-1.15 (m, 8H), 0.87 (t,  $J = 7$  Hz, 3H);  $^{13}\text{C}$  NMR (126 MHz  $\text{CDCl}_3$ )  $\delta$  136.7, 128.4, 127.8, 126.44, 64.1, 37.3, 35.9, 35.5, 32.0, 29.3, 27.6, 27.1; HRMS (ESI-TOF)  $m/z$ : calculated for  $\text{C}_{18}\text{H}_{26}\text{NaO}_2$   $[\text{M}+\text{Na}]^+$  297.1825; found 297.1830;  $[\alpha]_D^{20} = +16$  (c 1.0, chloroform); Chiral HPLC: Phenomenex-Lux 1 column, 99:1 (Hexane:*i*-PrOH), 1.0 ml/min, (99:1 e.r.), major: 15.41 min, minor: 16.63 min.

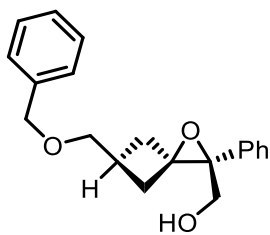

**[(2S,3s,5R)-5-(benzyloxy)methyl]-2-phenyl-1-oxaspiro[2.3]hexan-2-yl]methanol (4i).**

Following the general procedure described above, the reaction was performed in *i*-PrOH (4.0 mL) KOH (23 mg, 0.40 mmol), **3i** (85 mg, 0.27 mmol), rt. The crude product was purified by flash chromatography using hexanes-diethyl ether 10:1-1:1 as eluents. Colorless oil (80%); FT-IR (film) $\nu_{\max}$  (cm<sup>-1</sup>): 3415, 2891, 2878, 1456, 1419, 1028, 908, 761, 699;

<sup>1</sup>H NMR (500 MHz, CDCl<sub>3</sub>)  $\delta$ : 7.55-7.48 (m, 1H), 7.36-7.21 (m, 4H), 4.49 (s, 2H), 4.15 (d, *J* = 12.3 Hz, 1H), 3.86 (d, *J* = 12.3 Hz, 1H), 3.49 (dd, *J* = 6.1, 2.9 Hz, 1H), 2.67-2.57 (m, 1H), 2.31 (dt, *J* = 12.9, 7.8 Hz, 2H), 2.04 (dd, *J* = 12.1, 5.2 Hz, 1H), 1.99-1.94 (m, 1H); <sup>13</sup>C NMR (126 MHz CDCl<sub>3</sub>)  $\delta$ : 137.9, 137.1, 128.3, 127.8, 127.7, 127.6, 127.6, 127.5, 74.3, 73.4, 73.1, 61.7, 51.3, 35.7, 34.6, 31.5, 25.9, 22.5, 14.0; HRMS (ESI-TOF) *m/z*: calculated for C<sub>20</sub>H<sub>22</sub>NaO<sub>3</sub> [M+Na]<sup>+</sup> 333,1467; found 333,1498; [ $\alpha$ ]<sub>D</sub><sup>20</sup> = -32.0 (c 1.0, chloroform); Chiral HPLC: Chiralpak AS-H column, 92:8 (Hexane:*i*-PrOH), 1.0 ml/min, (99:1 e.r.), major: 33.19 min, minor: 38.31 min.

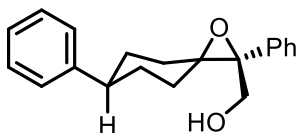

**[(2S,3s,6R)-2,6-Diphenyl-1-oxaspiro[2.5]octan-2-yl]methanol (4k).**

Following the general procedure described above, the reaction was performed in *i*-PrOH (6.0 mL) KOH (27 mg, 0.48 mmol), **3k** (95 mg, 0.32 mmol), rt. The crude product was purified by flash chromatography using hexanes-diethyl ether 10:1-1:1 as eluents. Colorless oil (92%); FT-IR (film) $\nu_{\max}$  (cm<sup>-1</sup>): 3457, 3026, 2982, 2878, 1445, 1352, 1248, 1229, 1064, 1012, 925, 768, 696;

<sup>1</sup>H NMR (400 MHz, CDCl<sub>3</sub>)  $\delta$ : 7.43 (d, *J* = 7.4 Hz, 2H), 7.37 (t, *J* = 7.5 Hz, 2H), 7.30 (dd, *J* = 14.2, 6.9 Hz, 3H), 7.21 (dd, *J* = 12.9, 5.9 Hz, 3H), 4.17 (d, *J* = 11.9 Hz, 1H), 3.99 (d, *J* = 11.9 Hz, 1H), 2.70-2.48 (m, 1H), 2.20-2.06 (m, 1H), 2.02 (dd, *J* = 9.1, 2.7 Hz, 2H), 1.74 (dd, *J* = 9.4, 5.2 Hz, 3H), 1.53-1.35 (m, 1H), 1.25 (br.s, 1H), 1.14 (d, *J* = 11.8 Hz, 1H); <sup>13</sup>C NMR (101 MHz, CDCl<sub>3</sub>)  $\delta$ : 145.8, 137.7, 128.3, 128.2, 127.5, 126.6, 126.2, 70.0, 68.6, 64.8, 43.1, 33.4, 32.3, 31.5, 30.5; HRMS (ESI-TOF) *m/z*: calculated for C<sub>20</sub>H<sub>22</sub>NaO<sub>2</sub> [M+Na]<sup>+</sup> 317,1517; found 317,1538; [ $\alpha$ ]<sub>D</sub><sup>20</sup> = -29.4 (cc 1.3, chloroform); Chiral HPLC: Chiralpak AD-H column, 95:5 (Hexane:*i*-PrOH), 1.0 ml/min, (94:6 e.r.), major: 30.50 min, minor: 24.94 min.

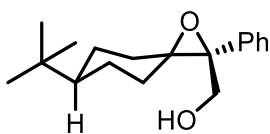

**[(2S,3s,6R)-6-(tert-butyl)-2-phenyl-1-oxaspiro[2.5]octan-2-yl]methanol (4l).**

Following the general procedure described above, the reaction was performed in *i*-PrOH (6.0 mL) KOH (36 mg, 0.64 mmol), **3l** (120 mg, 0.43 mmol), rt. The crude product was purified by flash chromatography using hexanes-diethyl ether 10:1-1:1 as eluents. White solid (78%); mp = 69-71° C; FT-IR (film) $\nu_{\max}$  (cm<sup>-1</sup>): 3471, 2960, 2942, 2857, 1446, 1363, 1261, 1212, 1066, 1008, 900, 869, 779, 703, 695;

<sup>1</sup>H NMR (500 MHz, CDCl<sub>3</sub>)  $\delta$ : 7.37 (m, 4H), 7.33-7.28 (m, 1H), 4.14 (dd, *J* = 11.8, 5.1 Hz, 1H), 3.96 (dd, *J* = 11.9, 5.4 Hz, 1H), 2.04-1.89 (m, 2H), 1.83 (td, *J* = 13.1, 3.4 Hz, 1H), 1.57 (dd, *J* = 9.2, 3.9 Hz, 1H), 1.54 (br.s, 1H), 1.23 (dt, *J* = 12.1, 9.5 Hz, 1H), 1.15-1.07 (m, 1H), 1.07-1.02 (m, 1H), 0.97 (td, *J* = 12.4, 2.8 Hz, 1H), 0.86 (s, 9H); <sup>13</sup>C NMR (126 MHz CDCl<sub>3</sub>)  $\delta$ : 137.9, 128.2, 127.4, 126.7, 69.9, 69.3, 64.8, 47.2, 32.3, 31.5, 30.6, 27.6, 27.0, 25.5; HRMS (ESI-TOF) *m/z*: calculated for C<sub>18</sub>H<sub>26</sub>NaO<sub>2</sub> [M+Na]<sup>+</sup> 297,1830; found 297.1827; [ $\alpha$ ]<sub>D</sub><sup>20</sup> = -21,23 (c 0.5, chloroform); Chiral HPLC: Chiralpak AD-H column, 92:8 (Hexane:*i*-PrOH), 1.0 ml/min, (99:1 e.r.), major: 29.25 min, minor: 34.78 min.

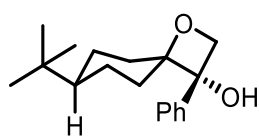

**(3S,4s,7R)-7-(tert-butyl)-3-phenyl-1-oxaspiro[3.5]nonan-3-ol (5).**

Colorless oil (15%); FT-IR  $\nu_{\max}$  ( $\text{cm}^{-1}$ ): 3445, 3032, 3007, 2944, 1601, 1485, 1444, 1029, 1008, 956, 739;  $^1\text{H}$  NMR (500 MHz,  $\text{CDCl}_3$ )  $\delta$  7.44 (dd,  $J = 7.8, 1.4$  Hz, 2H), 7.29-7.22 (m, 3H), 1.96 (br.s, 1H), 1.86-1.77 (m, 1H), 1.78-1.71 (m, 1H), 1.60-1.52 (m, 1H), 1.49-1.43 (m, 1H), 1.32 (tdd,  $J = 13.3, 4.0, 1.9$  Hz, 1H), 1.15-1.07 (m, 1H), 1.02-0.94 (m, 1H), 0.74 (s, 9H);  $^{13}\text{C}$  NMR (126 MHz  $\text{CDCl}_3$ )  $\delta$ ; 138.4, 128.3, 127.8, 127.7, 72.6, 64.9, 52.1, 46.5, 35.8, 35.6, 27.5, 24.1, 23.9; HRMS (ESI-TOF)  $m/z$ : calculated for  $\text{C}_{18}\text{H}_{26}\text{NaO}_2$   $[\text{M}+\text{Na}]^+$  297,1830; found 297.1838.

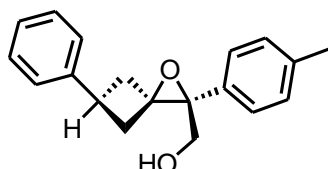

**[(2S,3s,5R)-(5-Phenyl-2-p-tolyl-1-oxa-spiro[2.3]hex-2-yl)-methanol (4ab).**

Following the general procedure described above, the reaction was performed in *i*-PrOH (5.0 mL) KOH (31 mg, 0.55 mmol), **3a** (100 mg, 0.37 mmol), rt. The crude product was purified by flash chromatography using hexanes-diethyl ether 10:1-1:1 as eluents. Colourless oil (96%); FT-IR (film) $\nu_{\max}$  ( $\text{cm}^{-1}$ ): 3450, 3048, 3025, 2938, 1604, 1483, 1448, 1032, 1012, 908;  $^1\text{H}$  NMR (600 MHz,  $\text{CDCl}_3$ )  $\delta$ : 7.25 (t,  $J = 7.6$  Hz, 2H), 7.18 (dd,  $J = 7.4, 5.9$  Hz, 4H), 7.14 (t,  $J = 8.3$  Hz, 2H), 4.18 (dd,  $J = 18.6, 9.1$  Hz, 1H), 3.92 (d,  $J = 12.2$  Hz, 1H), 3.24-3.14 (m, 1H), 2.96-2.86 (m, 1H), 2.69-2.61 (m, 1H), 2.41 (ddd,  $J = 13.0, 9.0, 0.9$  Hz, 1H), 2.29 (s, 3H), 2.26-2.18 (m, 1H);  $^{13}\text{C}$  NMR (151 MHz  $\text{CDCl}_3$ )  $\delta$ : 144.5, 137.5, 133.2, 129.1, 128.4, 126.4, 126.2, 66.6, 66.5, 63.9, 37.3, 36.9, 31.3, 21.1; HRMS (ESI-TOF)  $m/z$ : calculated for  $\text{C}_{19}\text{H}_{20}\text{NaO}_2$   $[\text{M}+\text{Na}]^+$  303,1361; found 303,1370;  $[\alpha]_D^{20} = -30.0$  (c 1.0, chloroform); Chiral HPLC: Phenomenex-Lux 1 column, 91:10 (Hexane:*i*-PrOH), 1.0 ml/min, (91:9 e.r.), major: 19.52 min, minor: 28.76.

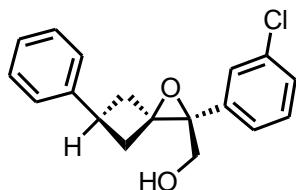

**[(2S,3s,5R)-[2-(3-Chloro-phenyl)-5-phenyl-1-oxa-spiro[2.3]hex-2-yl]-methanol (4ad).**

Following the general procedure described above, the reaction was performed in *i*-PrOH (4.0 mL) KOH (24 mg, 0.43 mmol), **3ad** (80 mg, 0.20 mmol), rt. The crude product was purified by flash chromatography using hexanes-diethyl ether 10:1-1:1 as eluents. Colourless oil (94%); FT-IR (film) $\nu_{\max}$  ( $\text{cm}^{-1}$ ): 3433, 2932, 1638, 1495, 1448, 1422, 1030, 1011, 925, 787, 752, 696;  $^1\text{H}$  NMR (500 MHz,  $\text{CDCl}_3$ )  $\delta$  7.37-7.20 (m, 9H), 4.23 (d,  $J = 12.3$  Hz, 1H), 3.98 (d,  $J = 12.3$  Hz, 1H), 3.31-3.23 (m, 1H), 2.99-2.94 (m, 1H), 2.75-2.70 (m, 1H), 2.52-2.48 (m, 1H), 2.29-2.24 (m, 1H), 1.84 (br. s, 1H);  $^{13}\text{C}$  NMR (126 MHz,  $\text{CDCl}_3$ )  $\delta$  144.3, 138.7, 134.6, 129.8, 128.6, 128.2, 126.7, 126.5, 126.4, 124.6, 67.1, 66.2, 63.9, 37.4, 36.9, 31.43; HRMS (ESI-TOF)  $m/z$ : calculated for  $\text{C}_{18}\text{H}_{17}\text{ClNaO}_2$   $[\text{M}+\text{Na}]^+$  323.0815; found 323.0810;  $[\alpha]_D^{20} = -30.0$  (c 1.0, chloroform); Chiral HPLC: Phenomenex-Lux 1 column, 90:10 (Hexane:*i*-PrOH), 1.0 ml/min, (88:12 e.r.), major: 12.02 min, minor: 22.15 min.

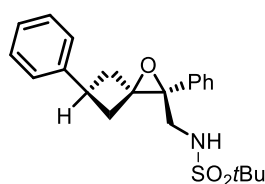

**(±)-N-([(2S,3s,5R)-2,5-diphenyl-1-oxaspiro[2.3]hexan-2-yl]methyl)-2-methylpropane-2-sulfonamide (7).**

Following the general procedure described above, the reaction was performed in *i*-PrOH (4.0 mL) KOH (15 mg, 0.27 mmol), **6** (70 mg, 0.18 mmol), rt. The crude product was purified by flash chromatography using hexanes-diethyl ether 10:1-1:1 as eluents. Waxy solid (72%);  $^1\text{H}$  NMR (500 MHz,  $\text{CD}_3\text{OD}$ )  $\delta$ : 7.46-7.41 (m, 1H), 7.38-7.32 (m, 2H), 7.31-7.27 (m, 2H), 7.26-7.23 (m, 2H), 7.21-7.14 (m, 1H),

4.01 (d,  $J = 14.1$  Hz, 1H), 3.37 (d,  $J = 14.1$  Hz, 1H), 3.32-3.29 (m, 1H), 3.01 (dddd,  $J = 12.8, 8.5, 4.1, 1.2$  Hz, 1H), 2.59 (ddd,  $J = 12.8, 8.9, 1.2$  Hz, 1H), 2.30 (ddd,  $J = 12.9, 8.9, 1.1$  Hz, 1H), 2.19 (dddd,  $J = 13.0, 8.8, 4.1, 1.3$  Hz, 1H), 1.25 (s, 5H);  $^{13}\text{C}$  NMR (126 MHz  $\text{CD}_3\text{OD}$ )  $\delta$ : 148.4, 140.3, 131.9, 131.7, 131.2, 130.7, 129.9, 129.7, 70.5, 69.6, 63.5, 40.6, 40.4, 34.8, 34.8, 27.1, 27.1; IR  $\nu_{\text{max}}$  ( $\text{cm}^{-1}$ ): 3479, 2983, 2935, 1777, 1732, 1602, 1495, 1455, 1303, 1124, 951, 754,699; HRMS (ESI-TOF)  $m/z$ : calculated for  $\text{C}_{22}\text{H}_{27}\text{NNaO}_3\text{S}$   $[\text{M}+\text{Na}]^+$  408,1609; found 408,1615.

## 5. Acid catalyzed C4-C5 ring expansion of spirocycle-adducts 4a and 7. Synthesis of cyclopentanones 8 and 9.

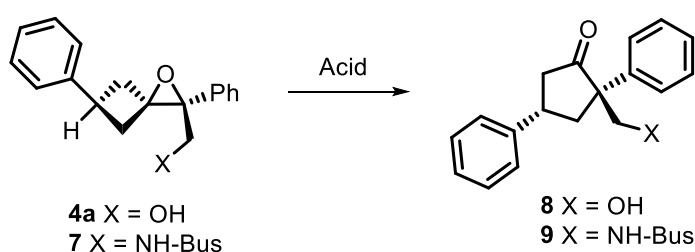

**Table 1. Acid screening**

| Entry | Acid (mol%)                     | Solvent                  | Temp. °C                 | Yield% | d.r.               |
|-------|---------------------------------|--------------------------|--------------------------|--------|--------------------|
| 1     | LiI                             | $\text{CH}_2\text{Cl}_2$ | rt                       | -      | -                  |
| 2     | LiBr                            | $\text{CH}_2\text{Cl}_2$ | rt                       | -      | -                  |
| 3     | $\text{AlMe}_3$                 | $\text{CH}_2\text{Cl}_2$ | -78                      | 23     | 73:27              |
| 4     | $\text{AlMe}_3$                 | $\text{CH}_2\text{Cl}_2$ | 0                        | 37     | 60:40              |
| 5     | $\text{TiCl}_4$ (20)            | EtOAc                    | -78                      | 34     | 80:20              |
| 6     | $\text{Me}_2\text{AlCl}$ (20)   | $\text{CH}_2\text{Cl}_2$ | -78                      | 94     | 80:20              |
| 7     | $\text{Me}_2\text{AlCl}$ (20)   | toluene                  | -40                      | 58     | 73:27              |
| 8     | $\text{FeCl}_3$ (20)            | $\text{CH}_2\text{Cl}_2$ | r.t.                     | -      | -                  |
| 9     | $\text{BF}_3\text{-OEt}_2$ (20) | $\text{CH}_2\text{Cl}_2$ | -78                      | 60     | 70:30              |
| 10    | $\text{SnCl}_4$ (20)            | $\text{CH}_2\text{Cl}_2$ | -78                      | 20     | 70:30              |
| 11    | TBDMSOTf                        | $\text{CH}_2\text{Cl}_2$ | $\text{CH}_2\text{Cl}_2$ | -      | -                  |
| 12    | MSA (20)                        | $\text{CH}_2\text{Cl}_2$ | -78                      | 84     | 45:55              |
| 13    | PTSA (20)                       | $\text{CH}_2\text{Cl}_2$ | -78                      | >98    | 50:50              |
| 14    | AcOH (20) <sup>a</sup>          | $\text{CHCl}_3$          | rt                       | >98    | 90:10 <sup>a</sup> |

a) reactions were performed using the azaspiro-derivative **6**

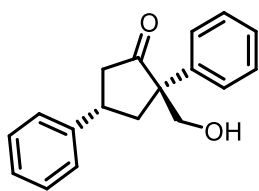

**(2*R*\*,4*R*\*)-2-Hydroxymethyl-2,4-diphenylcyclopentanone (8).** To a stirred solution of (1-oxaspiro[2.3]hex-2-yl)methanol adduct **4a** (50 mg, 0.18 mmol) in dry CH<sub>2</sub>Cl<sub>2</sub> (3 mL), Me<sub>2</sub>AlCl (1.0 M sol in hexane, 0.037 mmol, 37 μL) was added dropwise at -78° C. After 1h the reaction mixture was concentrated under reduced pressure and the crude

product was purified by flash chromatography using hexanes-diethyl ether 10:1-1:1 as eluents. Yellow oil (94%). Mixture of diastereomers (80:20) analytical data refer to the major diastereomer. <sup>1</sup>H NMR (500 MHz, CDCl<sub>3</sub>) δ: 7.42-7.39 (m, 3H), 7.35-7.31 (m, 3H), 7.25 (t, *J* = 7.1 Hz, 4H), 4.03 (d, *J* = 11.3 Hz, 1H), 3.72 (d, *J* = 11.2 Hz, 1H), 3.32 (ddd, *J* = 18.4, 10.4, 6.6 Hz, 1H), 2.88-2.79 (m, 2H), 2.57 (t, *J* = 12.9 Hz, 1H), 2.41 (dd, *J* = 19.6, 11.4 Hz, 1H), 2.02 (br.s, 1H); <sup>13</sup>C NMR (126 MHz CDCl<sub>3</sub>) δ: 218.6, 142.7, 136.9, 129.0, 128.6, 127.6, 126.8, 126.7, 126.7, 67.6, 61.9, 45.9, 38.8, 37.5; HRMS (ESI-TOF) *m/z*: calculated for C<sub>18</sub>H<sub>18</sub>NaO<sub>2</sub> [M+Na]<sup>+</sup> 289,1204; found 289,1211.

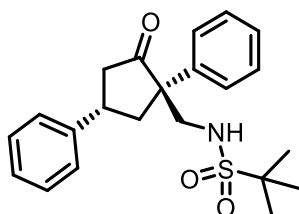

**2-methyl-*N*-[(1*R*\*,4*R*\*)-2-oxo-1,4-diphenylcyclopentyl]methyl} propane-2-sulfonamide (9).** To a stirred solution of (1-oxaspiro[2.3]hexan-2-yl)methyl]-2-methylpropane-2-sulfonamide adduct **7** (70 mg, 0.18 mmol), acetic acid (2.0 μL 0.036 mmol) was added dropwise in chloroform (3 mL) at room temperature. The reaction mixture was stirred for 1,5 hours, then was concentrated

under reduced pressure and the crude product was purified by flash chromatography using hexanes-diethyl ether 5:1-1:1 as eluents. Waxy solid (>98%); IR  $\nu_{\text{max}}$  (cm<sup>-1</sup>): 3397, 2974, 1728, 1406, 1320, 1128, 1073, 831, 757, 701, 659; <sup>1</sup>H NMR (500 MHz, CD<sub>3</sub>Cl) δ: 7.44–7.39 (m, 3H), 7.38–7.28 (m, 4H), 7.27–7.22 (m, 3H), 4.36 (t, *J* = 6 Hz, NH), 3.65–3.48 (m, 2H), 3.33–3.23 (m, 1H), 2.95 (ddd, *J* = 13, 5., 3 Hz, 1H), 2.84 (ddd, *J* = 20, 8, 3 Hz, 1H), 2.52 (t, *J* = 13 Hz, 1H), 2.39 (dd, *J* = 20, 11 Hz, 1H), 1.29 (s, 9 H); <sup>13</sup>C NMR (126 MHz CD<sub>3</sub>Cl) δ: 218.1, 142.4, 136.6, 129.4, 128.84, 128.2, 126.9, 126.9, 126.9, 126.8, 126.7, 61.4, 59.7, 51.4, 45.5, 39.4, 37.5, 24.4; HRMS (ESI-TOF) *m/z*: calculated for C<sub>22</sub>H<sub>27</sub>NNaO<sub>3</sub>S [M+Na]<sup>+</sup> 408.1604; found 408.1608.



## 6. Deprotection of sulfonamide 7

Different methodologies suitable for deprotecting the sulfonamide function were screened. However these attempts did not lead to obtaining the cleavage of the *N*-Bus bond. Below we report our attempts and the literature notes from which the individual procedures have been extrapolated.

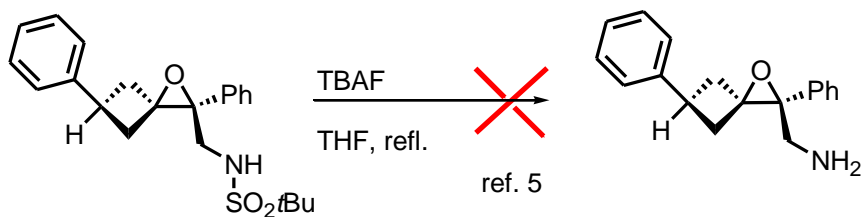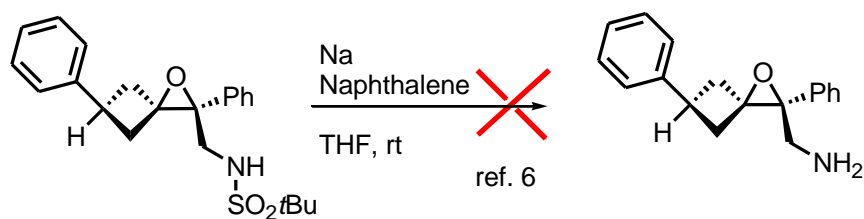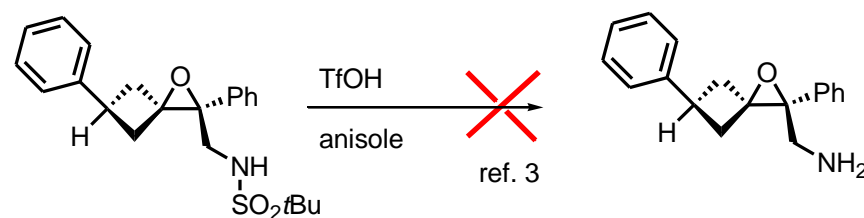

## 7. $^1\text{H}$ and $^{13}\text{C}$ NMR spectra of compounds 3a-l, 3ab, 3ad and 6

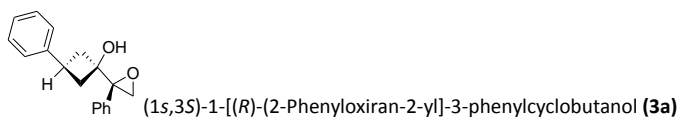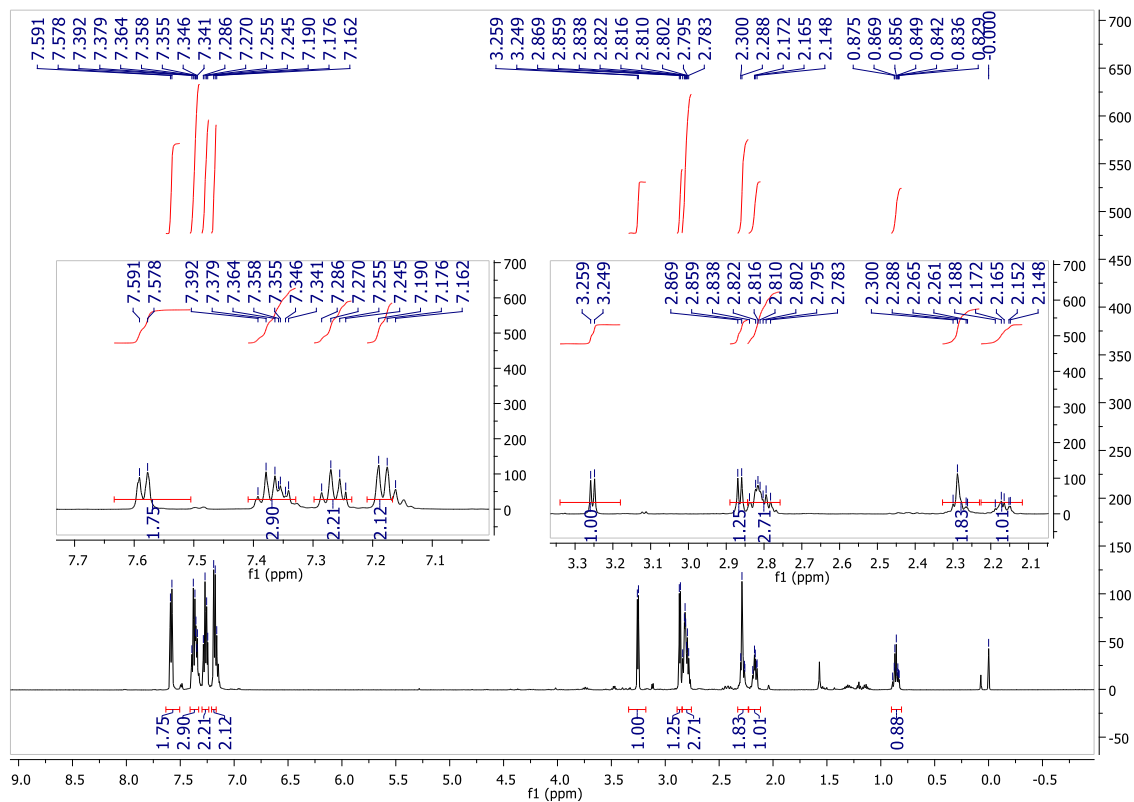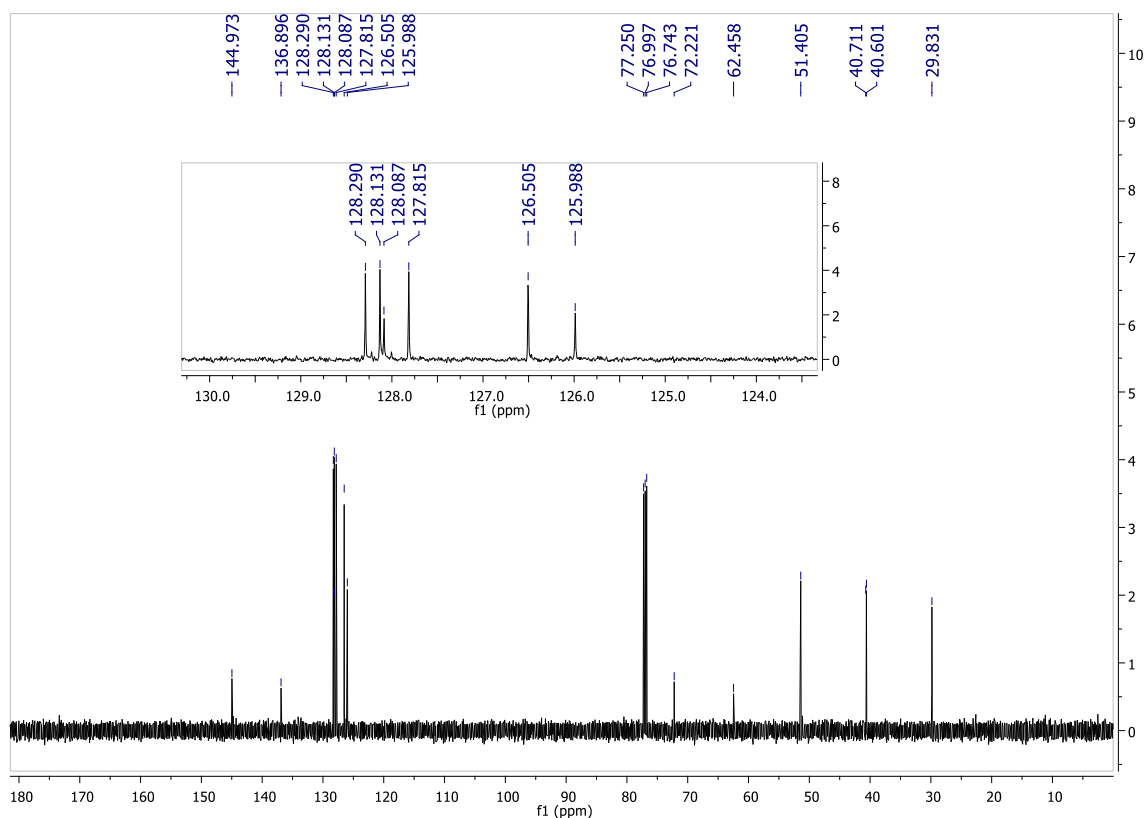

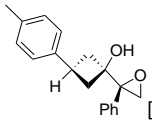

[(2S,3S,5R)-2-Phenyl-5-(p-tolyl)-1-oxaspiro[2.3]hexan-2-yl]methanol (**3b**)

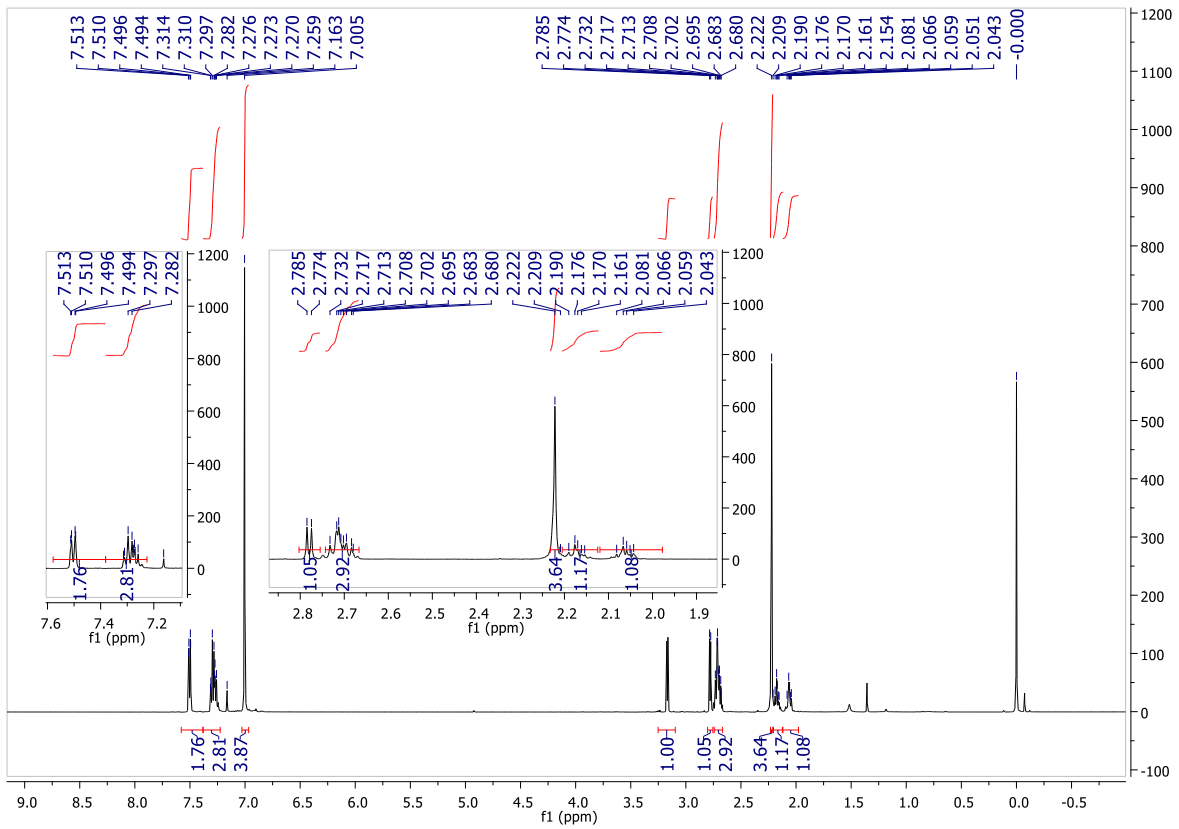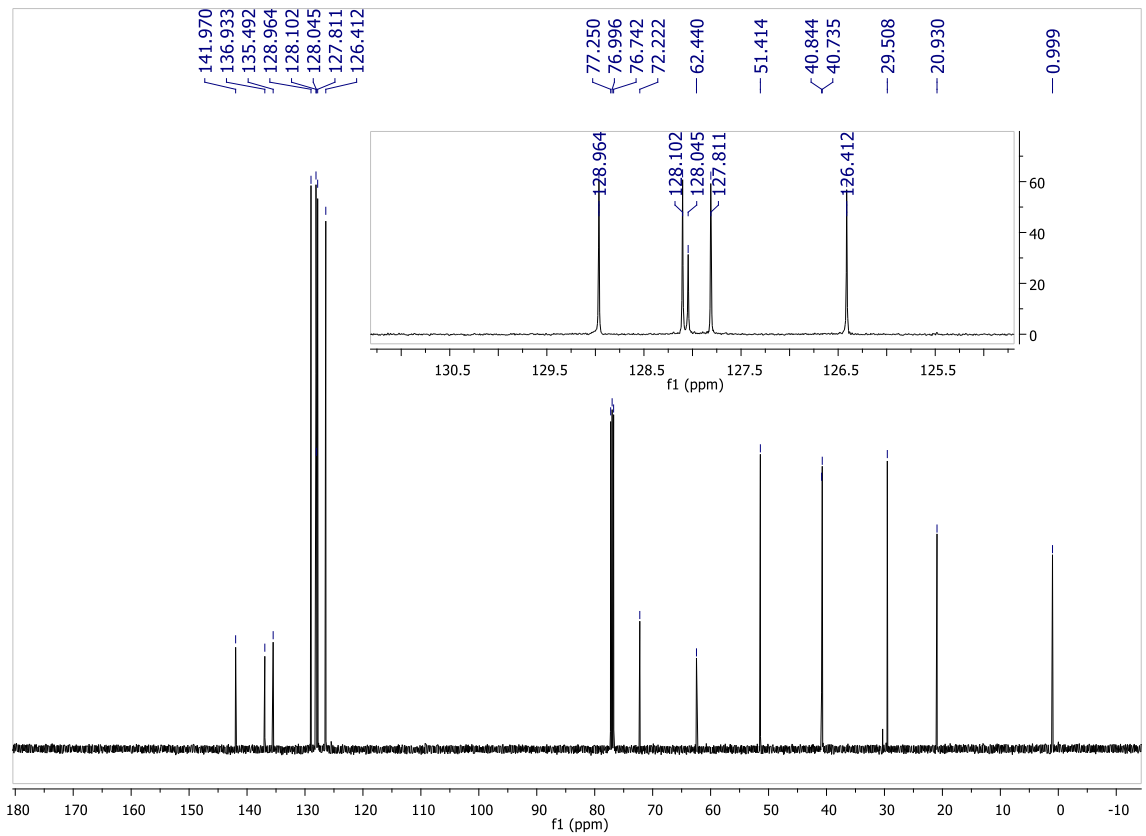

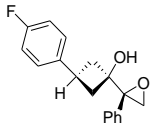

(1s,3s)-3-(4-Fluorophenyl)-1-[(R)-2-phenyloxiran-2-yl]cyclobutanol (**3c**)

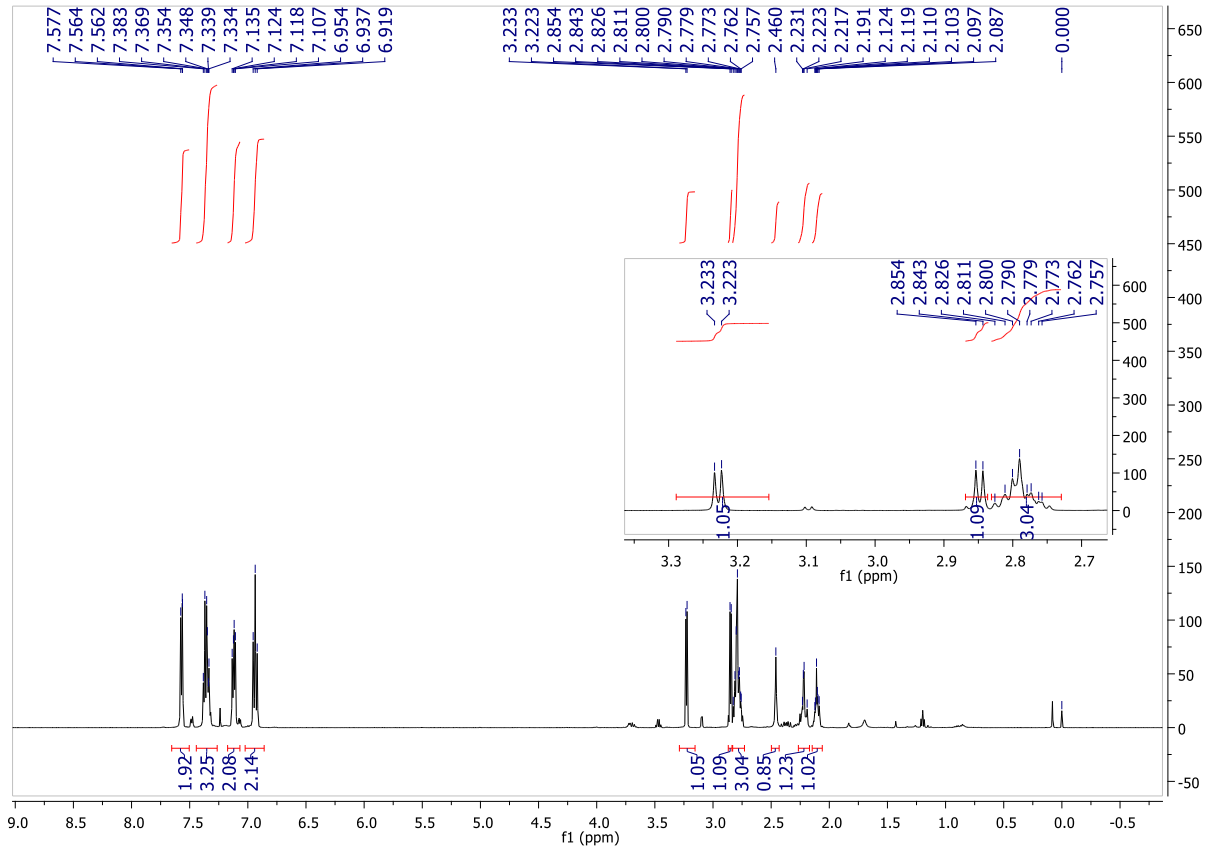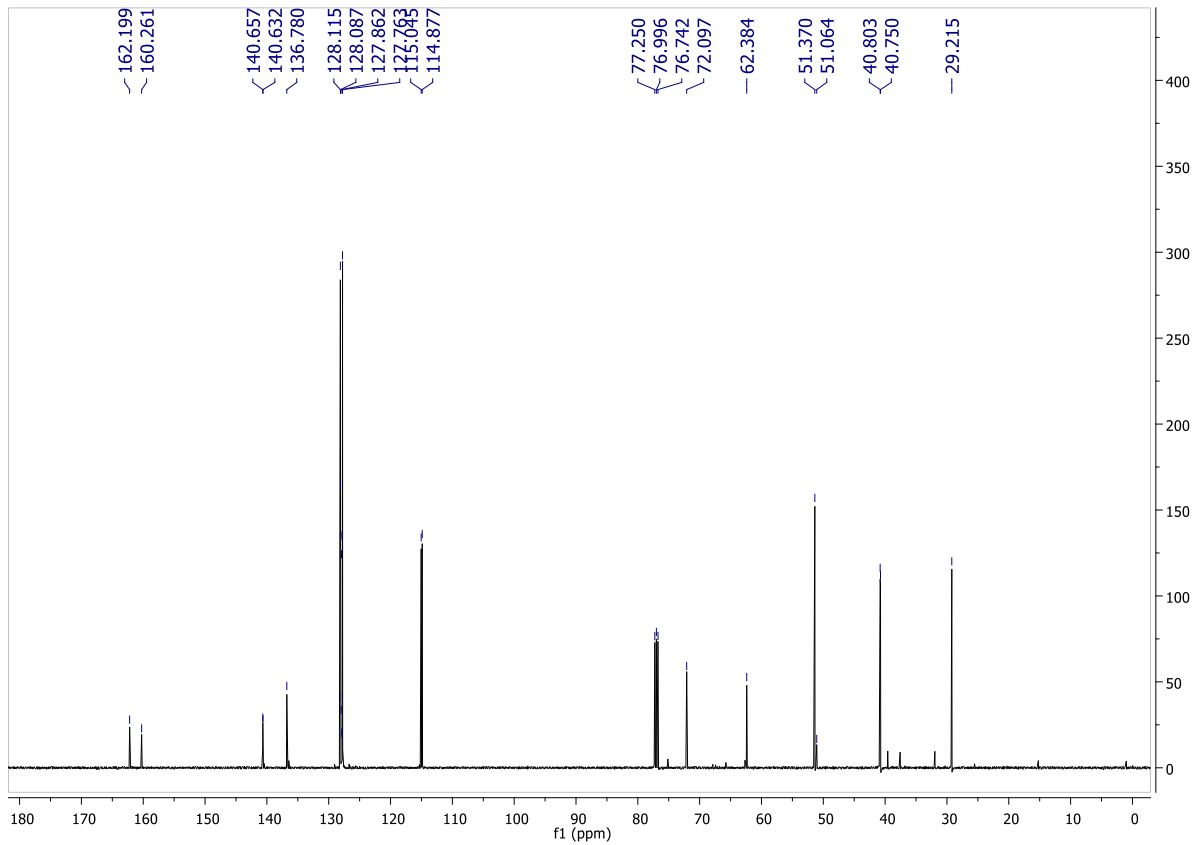

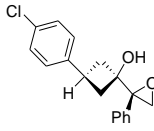

(1s,3s)-3-(4-Chlorophenyl)-1-[(R)-2-phenyloxiran-2-yl]cyclobutanol (**3d**)

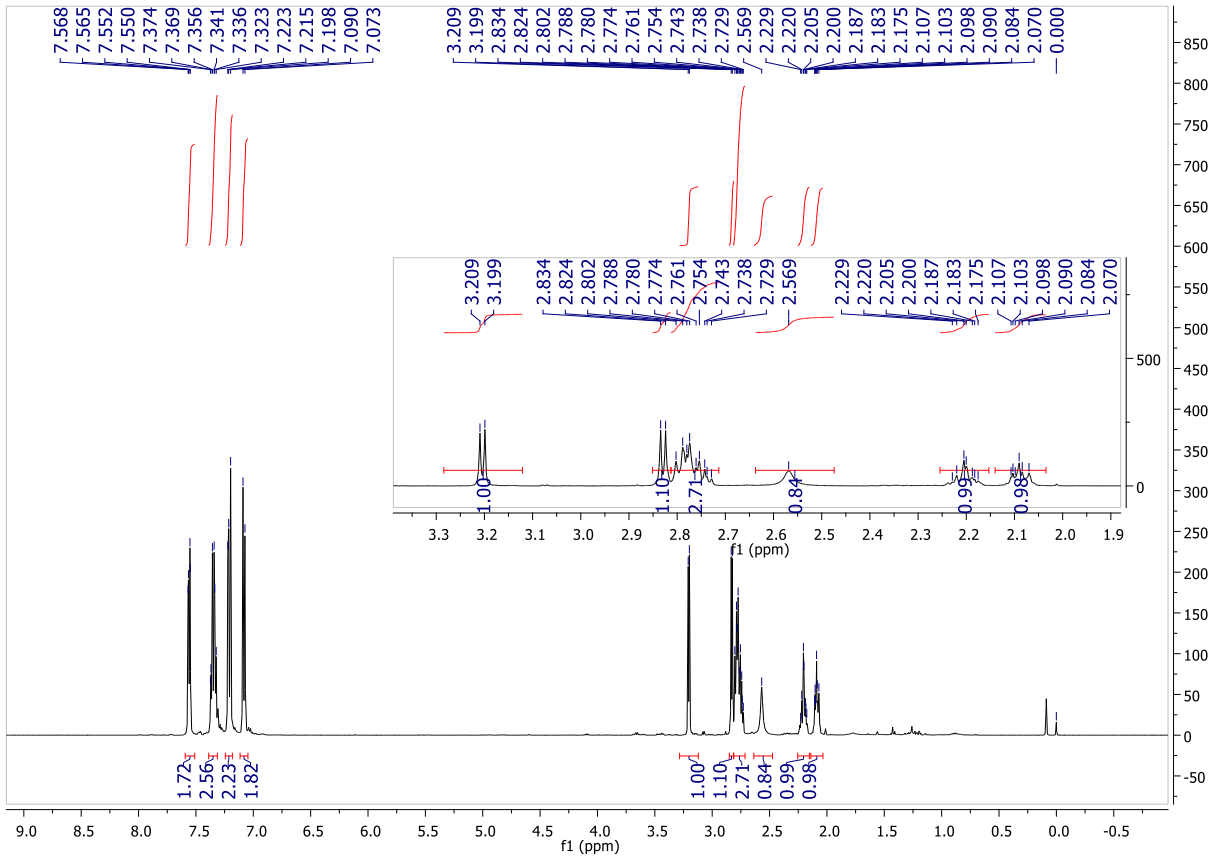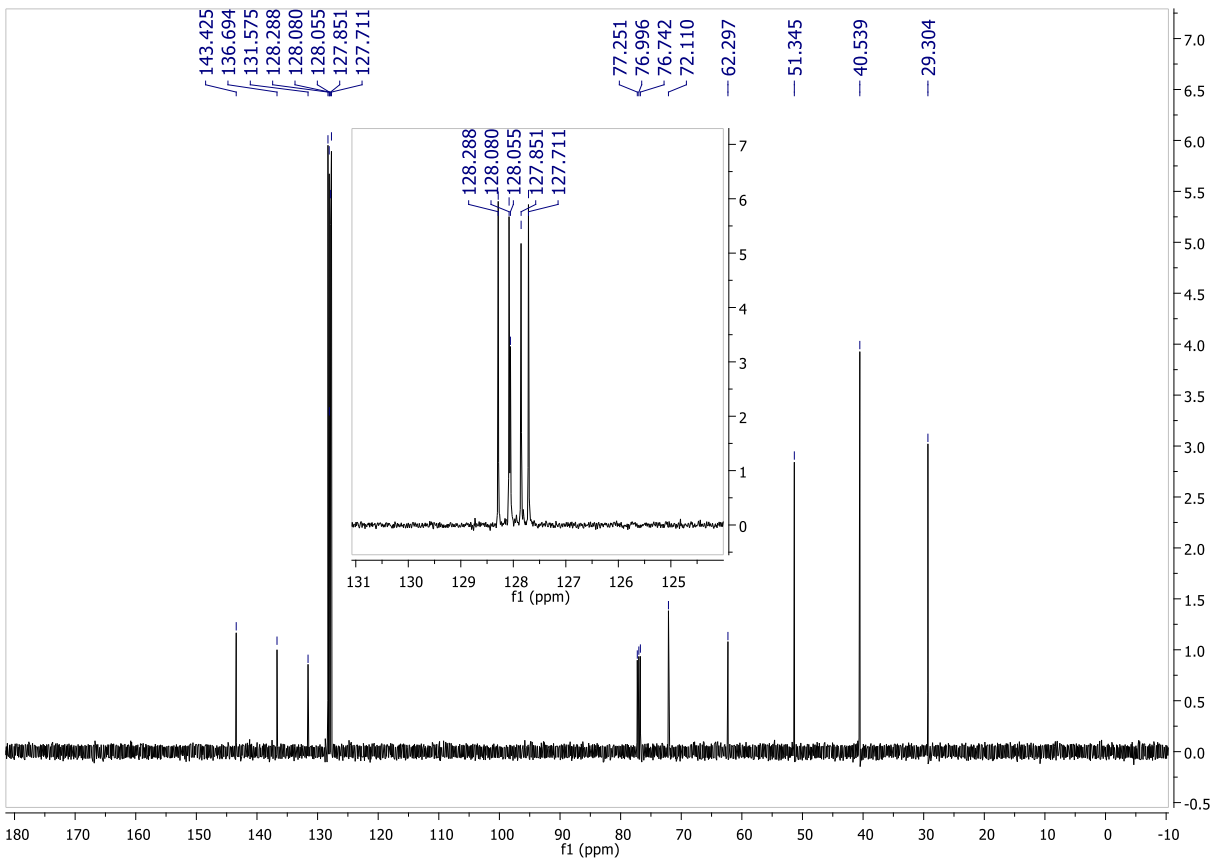

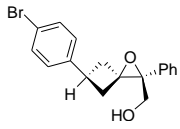

(2*S*,3*s*,5*R*)-[5-(4-Bromophenyl)-2-phenyl-1-oxaspiro[2.3]hexan-2-yl]methanol (**3e**)

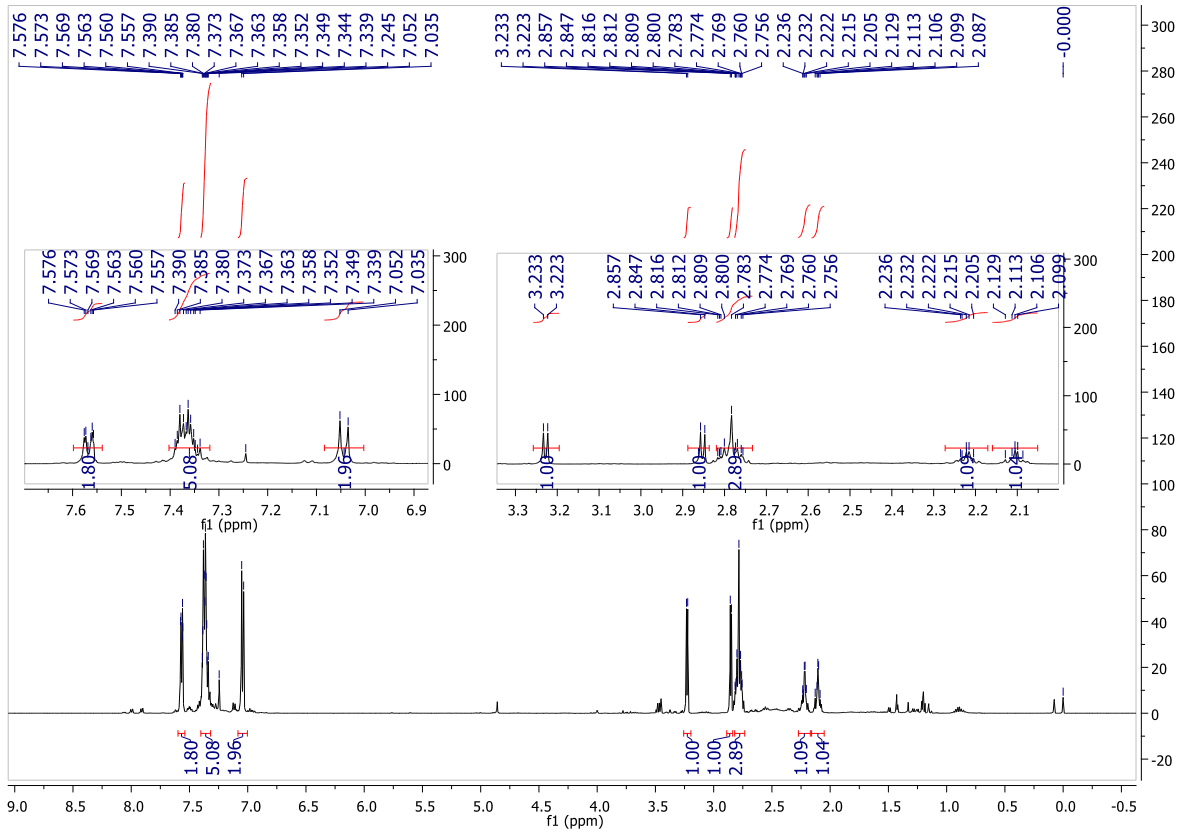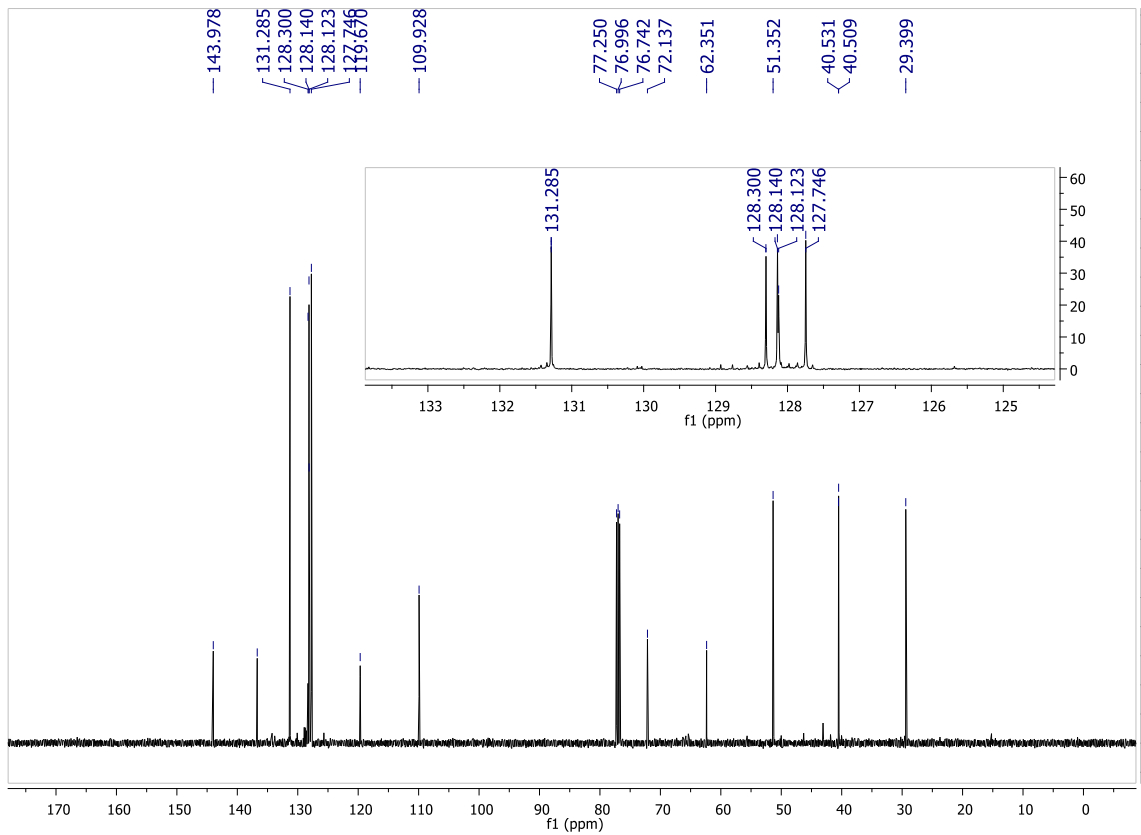

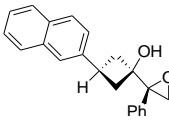

(1*S*,3*S*)-3-(naphthalen-2-yl)-1-[(*R*)-2-phenyloxiran-2-yl]cyclobutanol (**3f**)

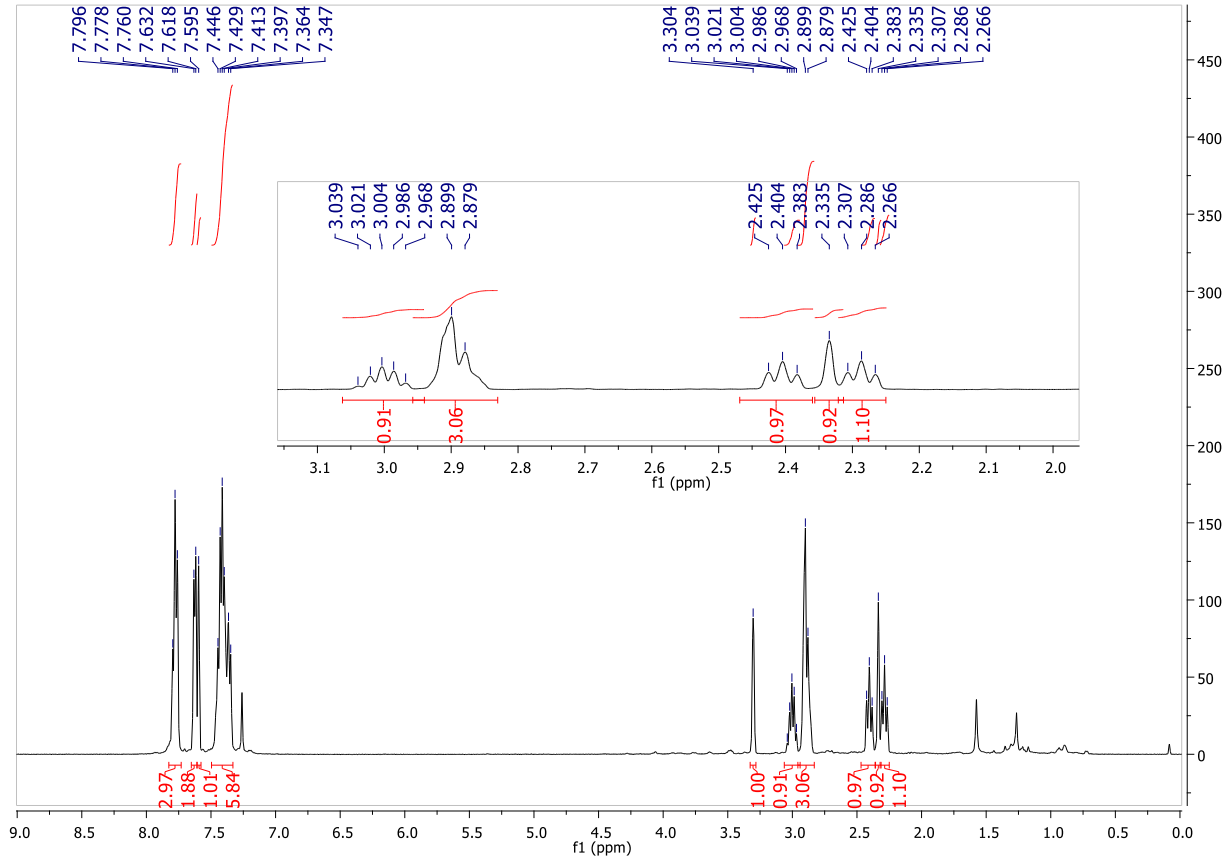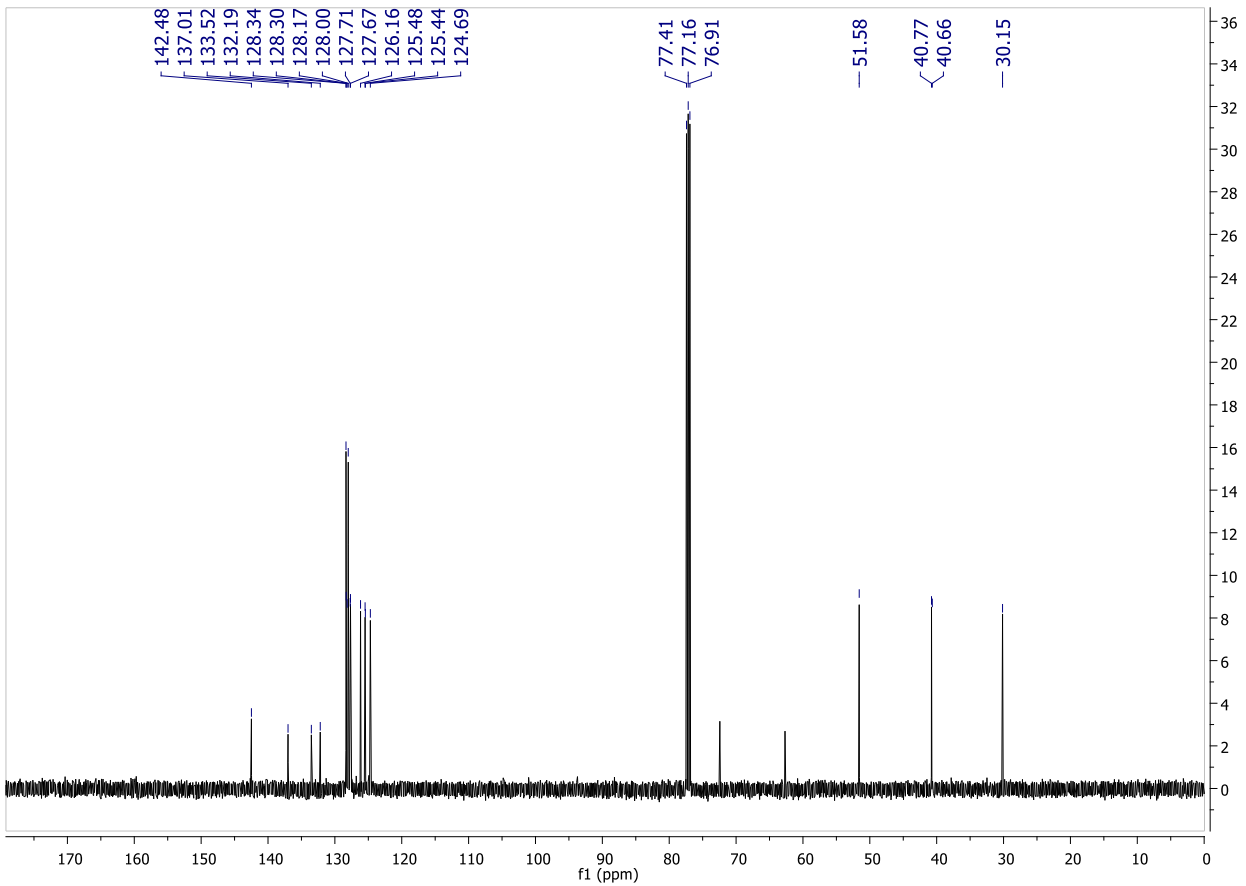

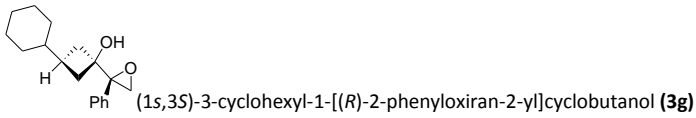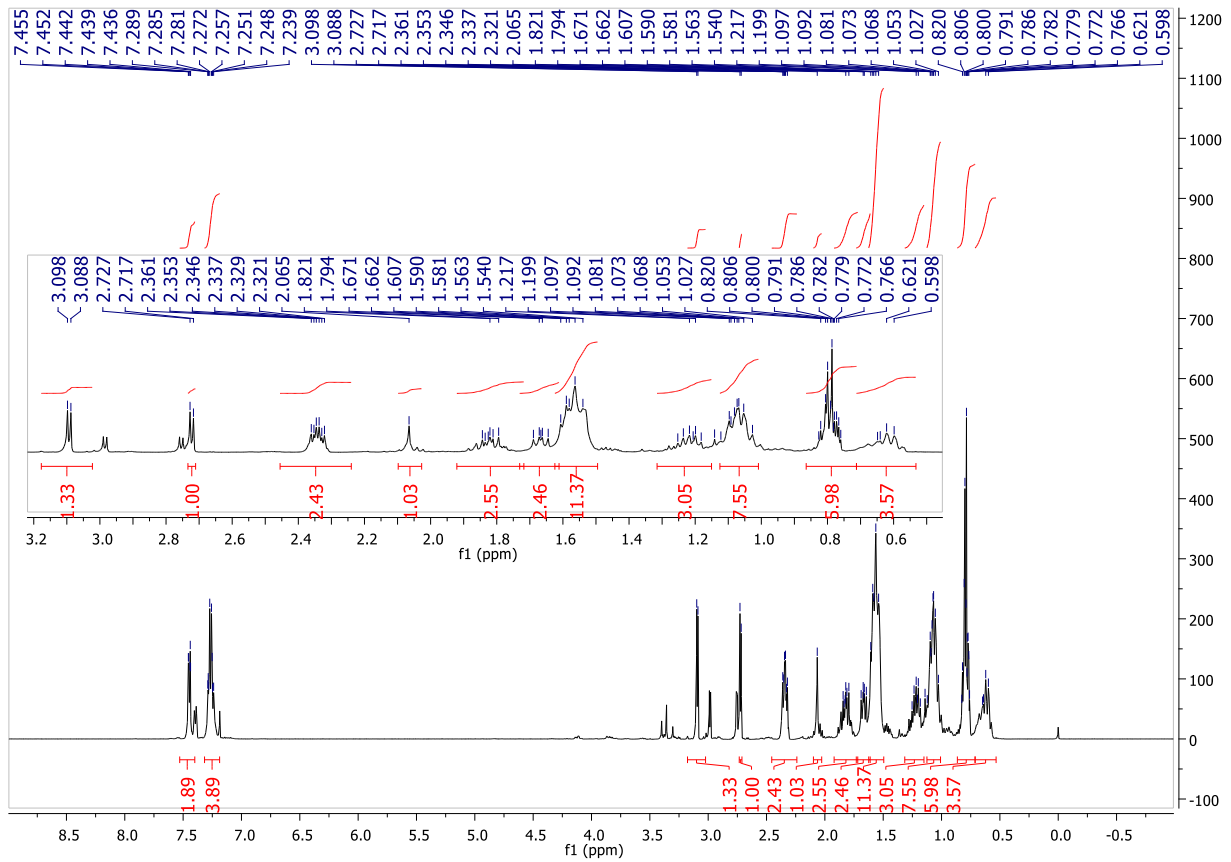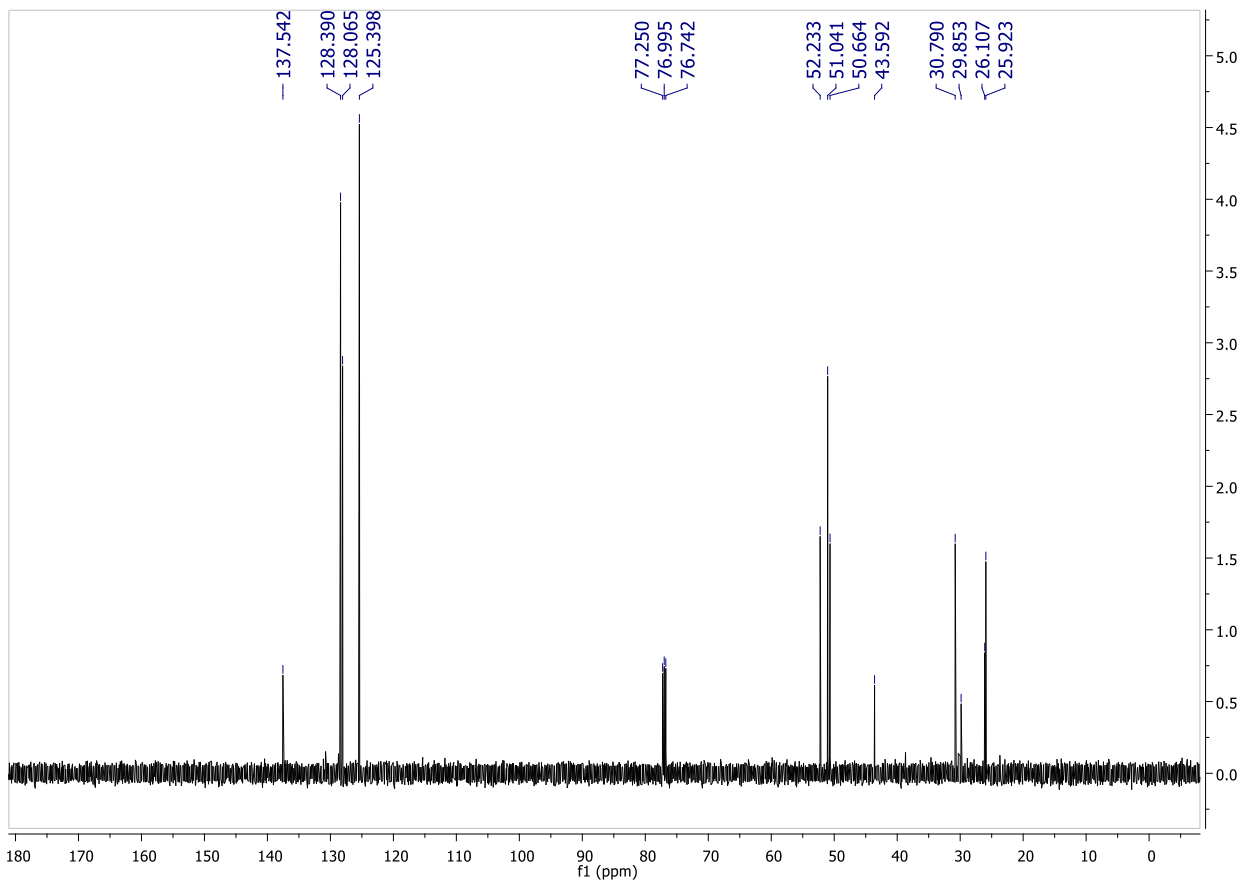



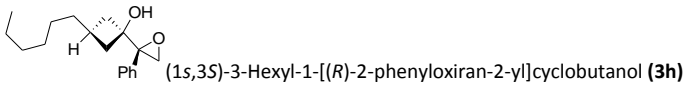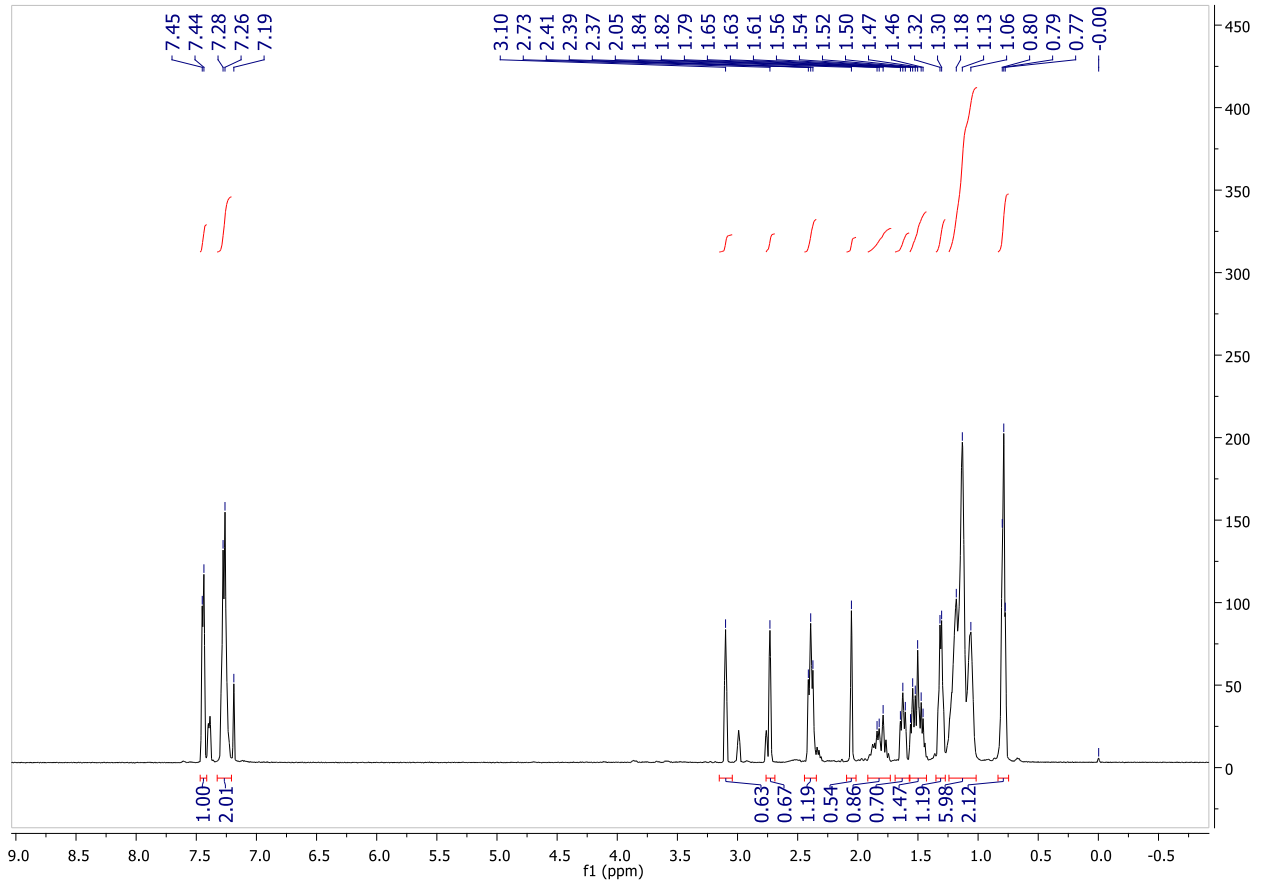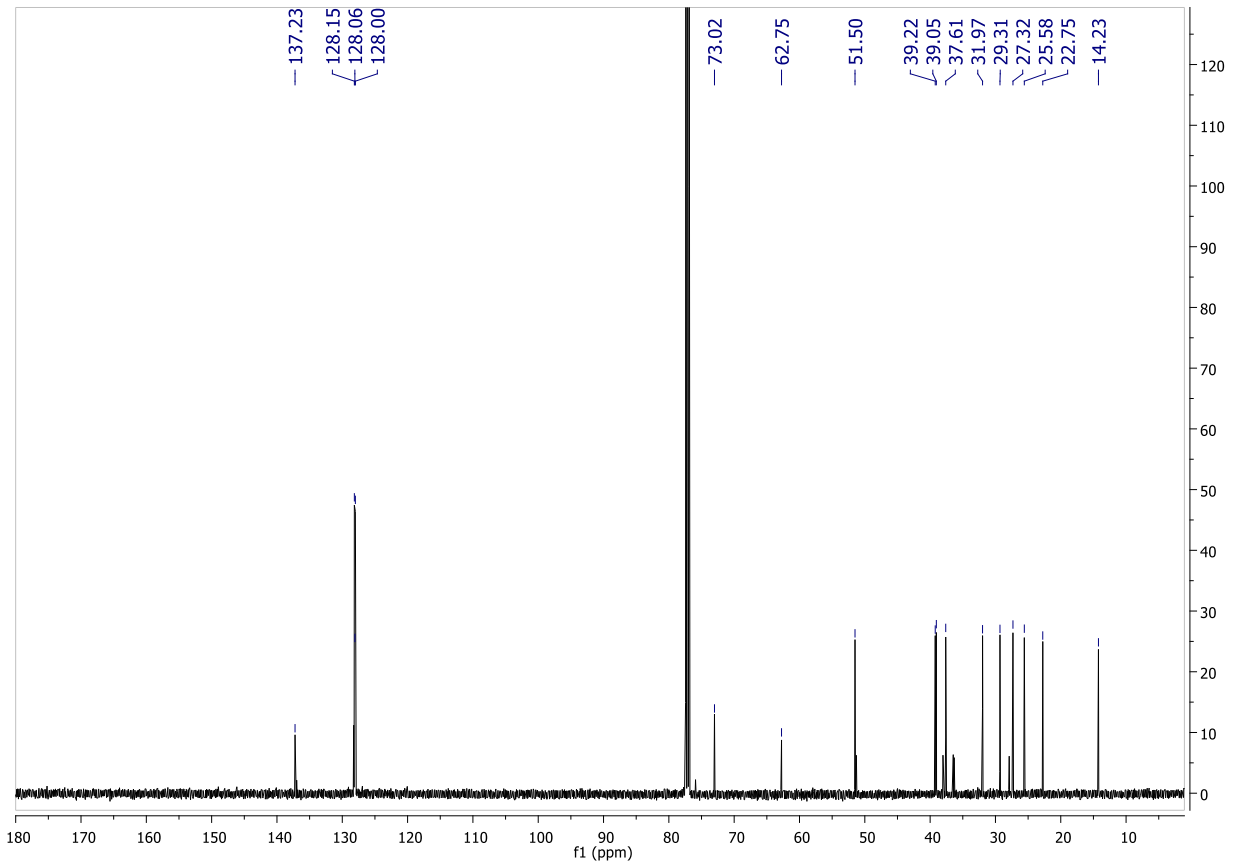

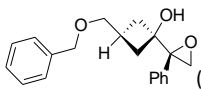

(1s,3s)-3-(benzyloxymethyl)-1-[(R)-2-phenyloxiran-2-yl]cyclobutanol (**3i**)

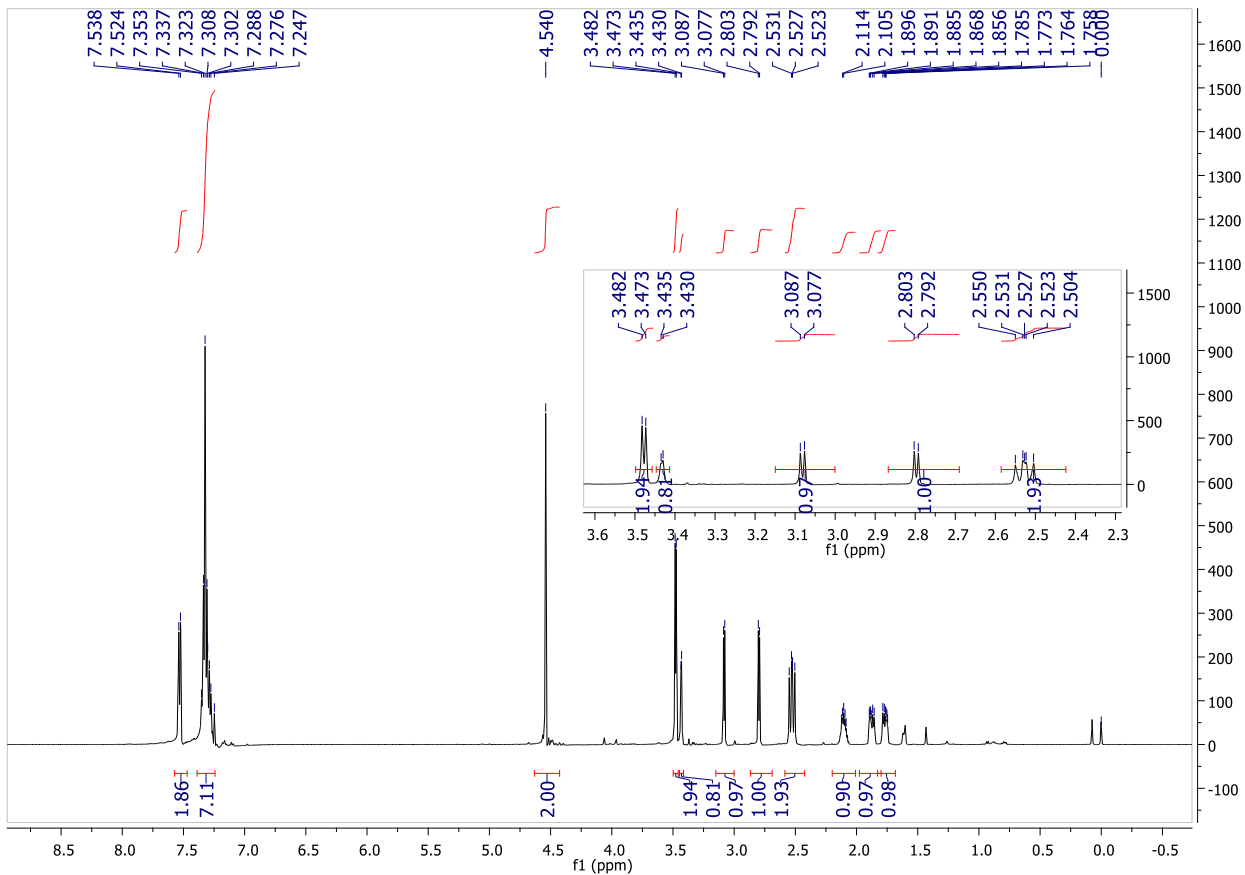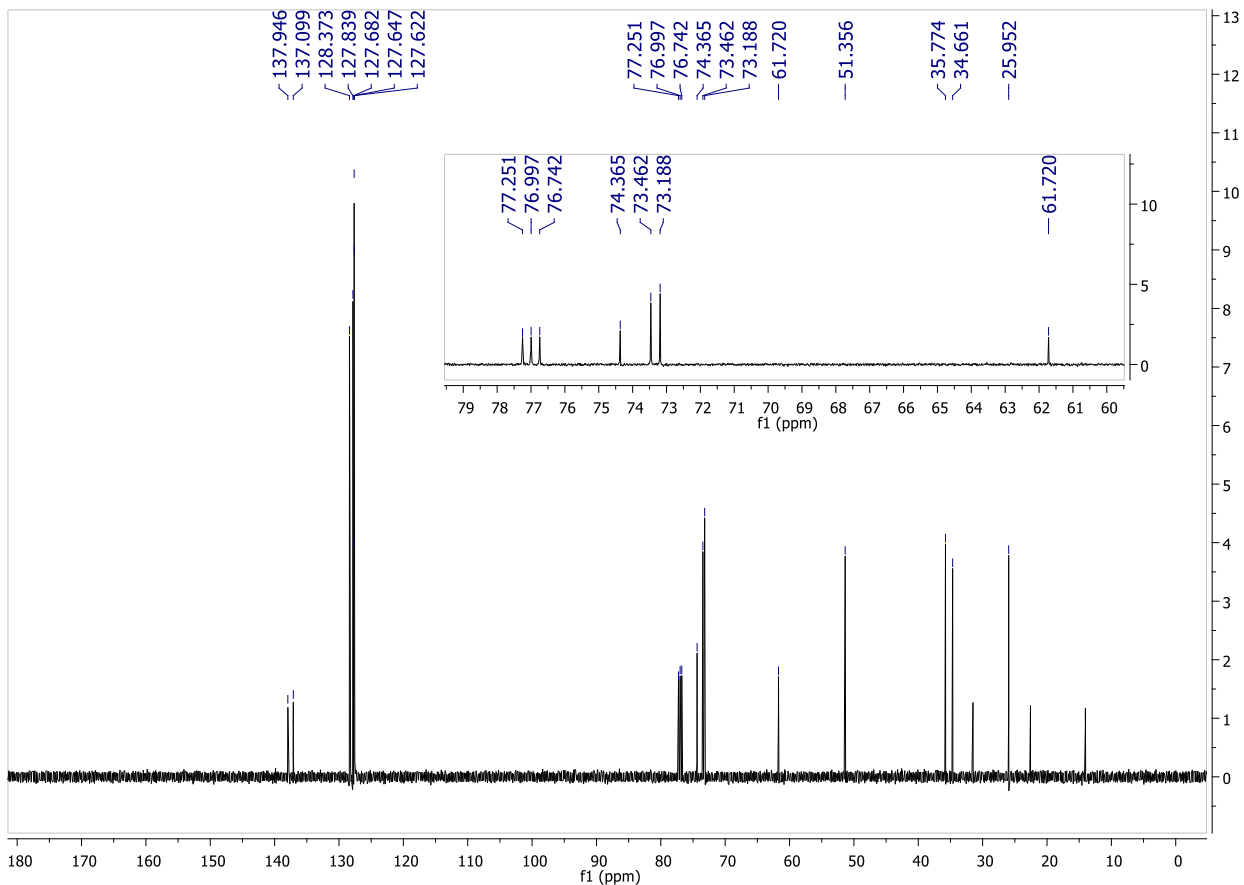

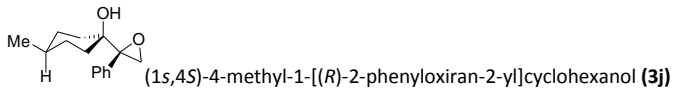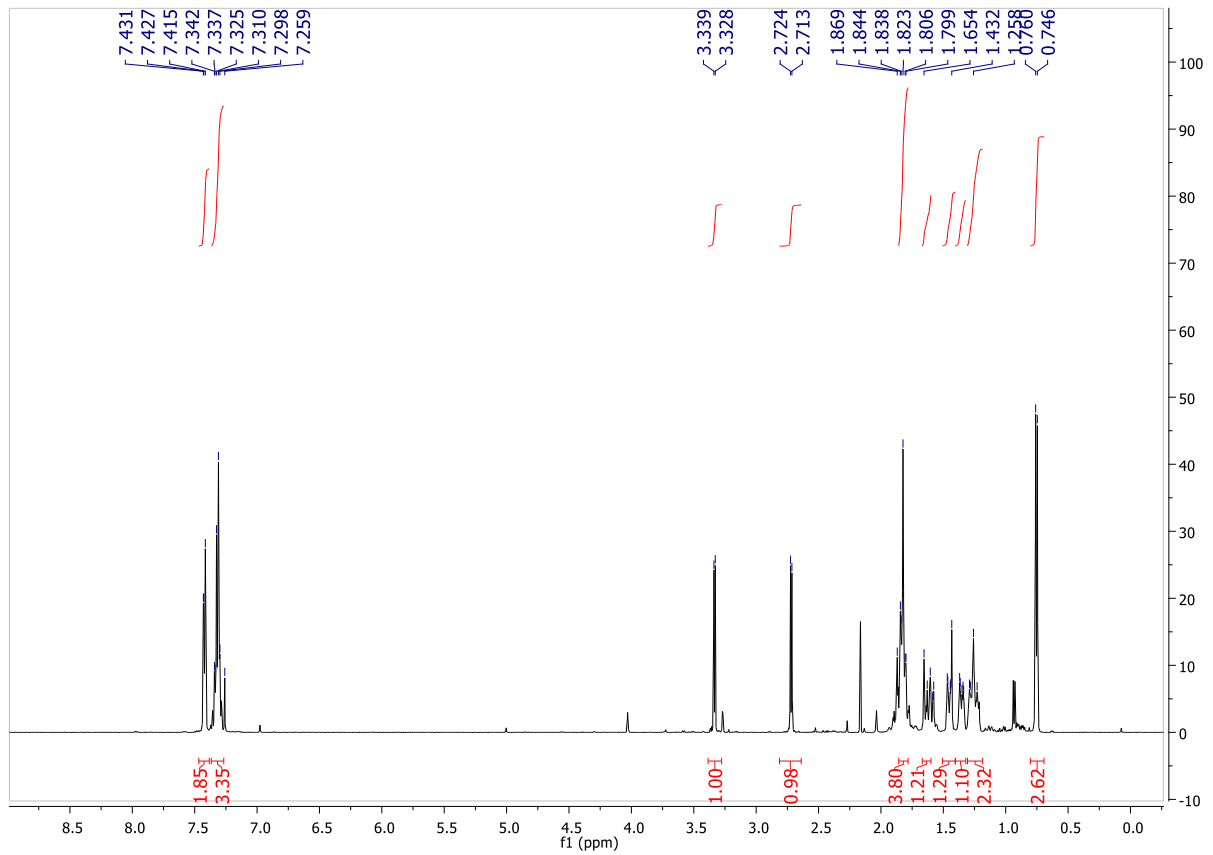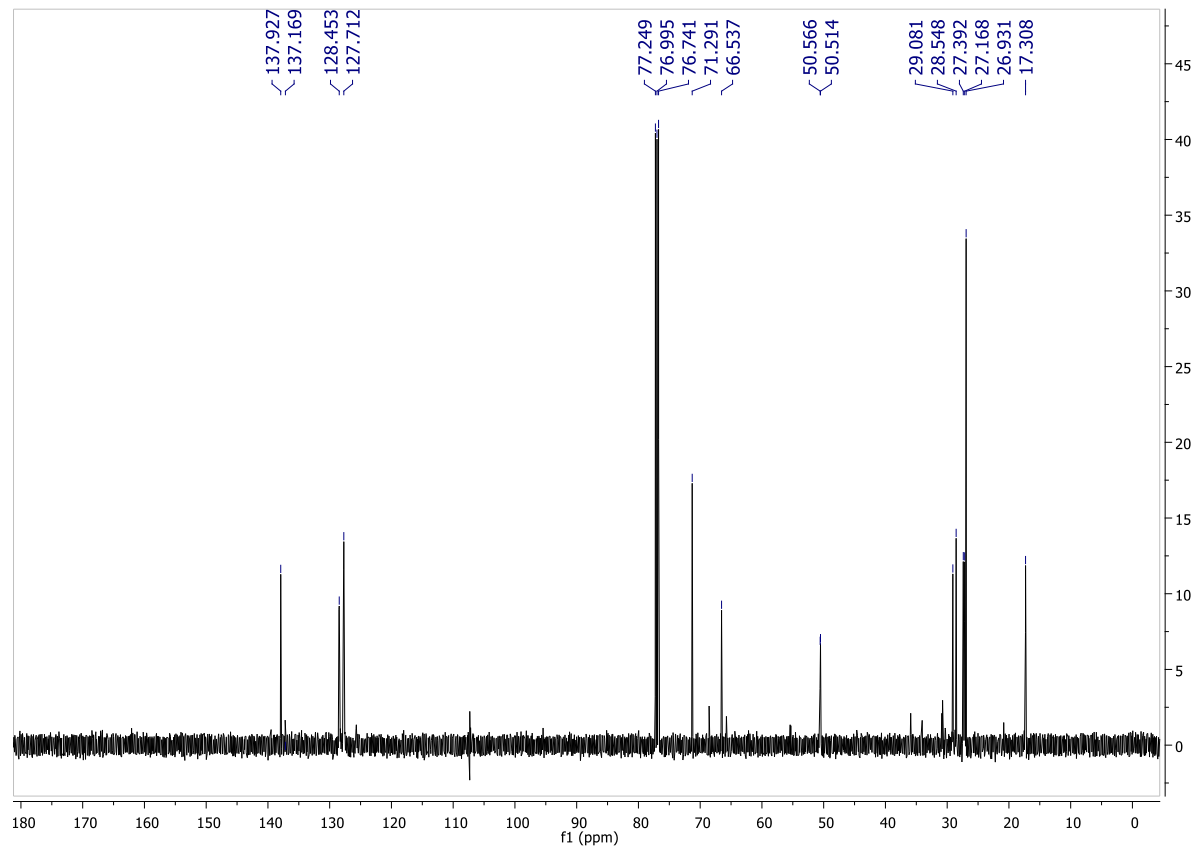

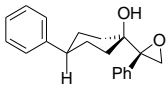

(1s,4s)-4-phenyl-1-[(*R*)-2-phenyloxiran-2-yl]cyclohexanol (**3k**)

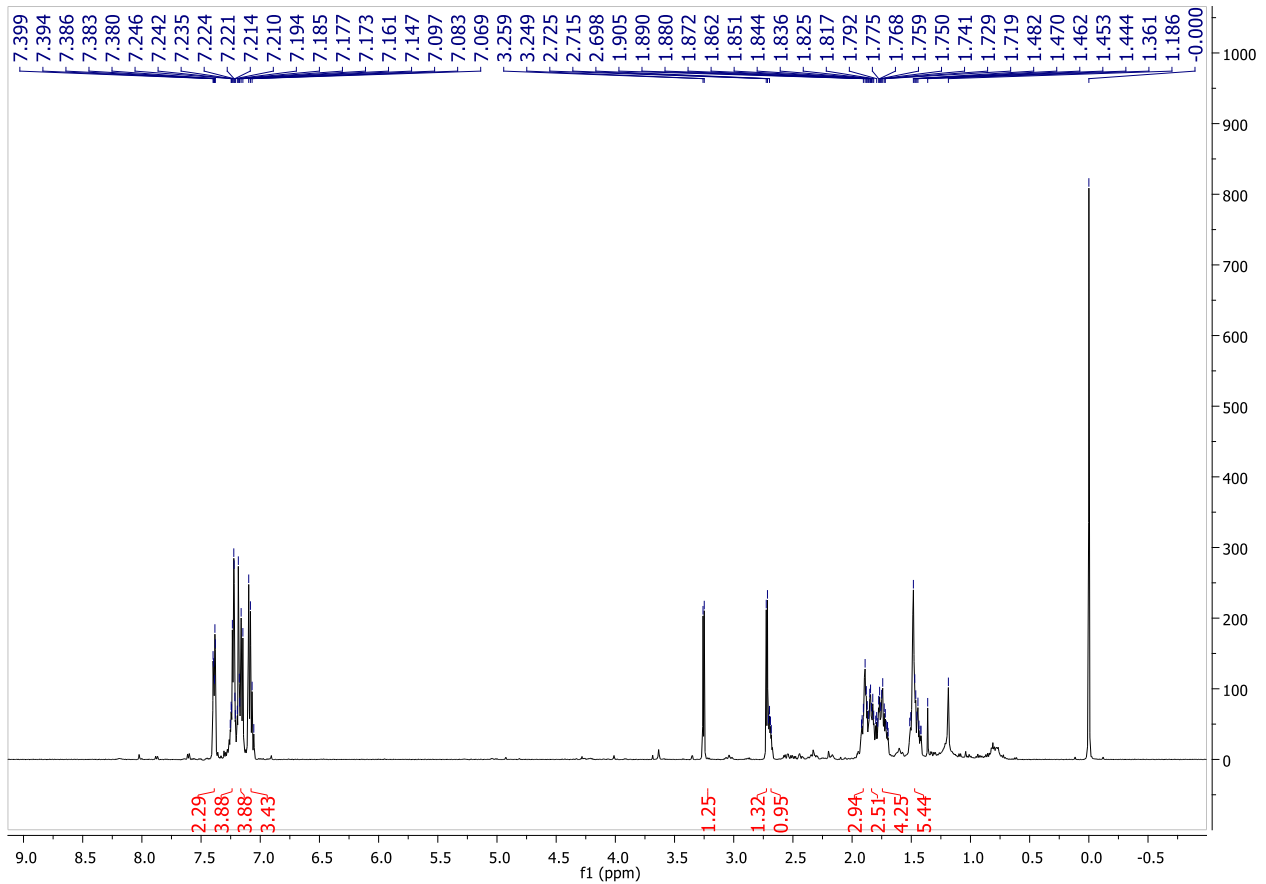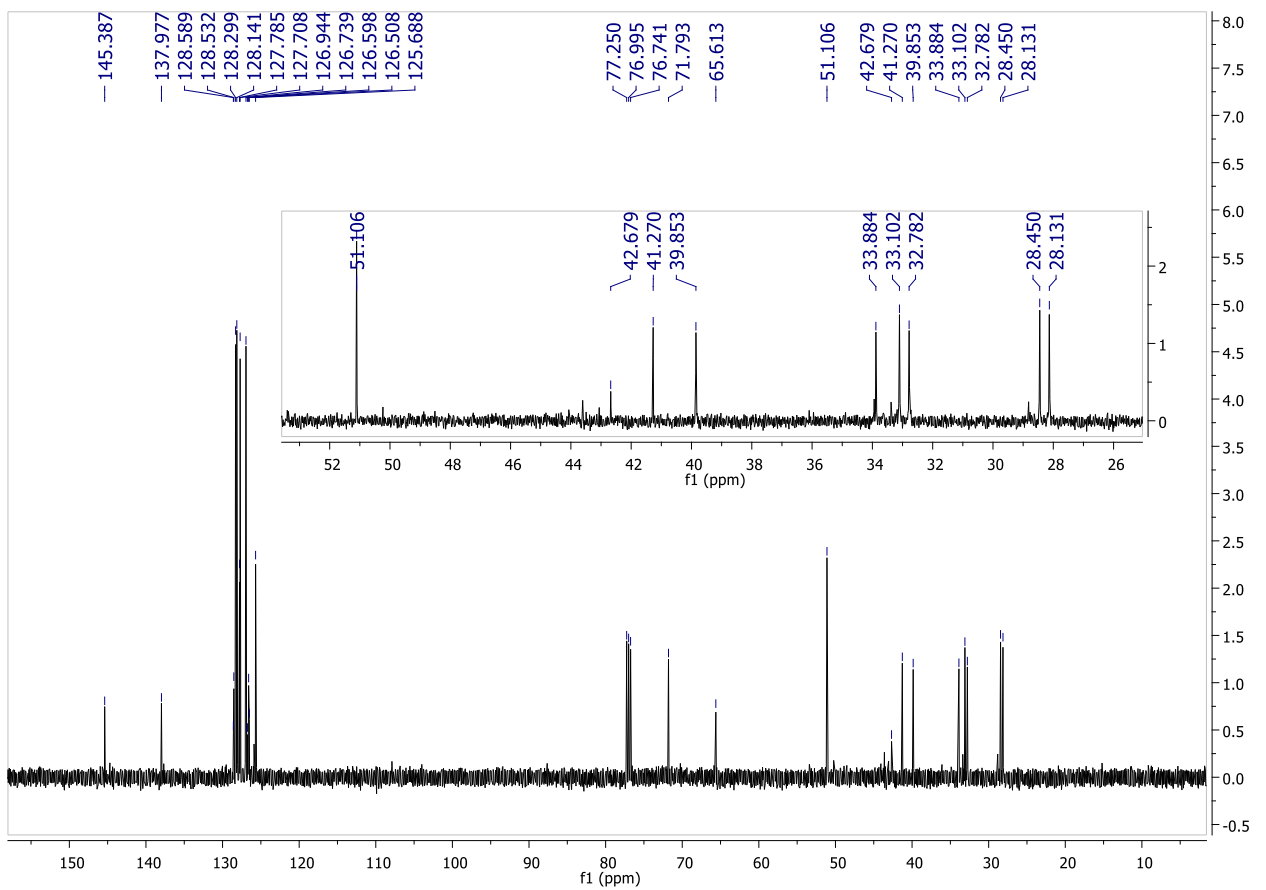

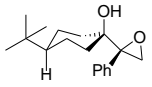

(1s,4s)-4-tert-butyl-1-[(R)-2-phenyloxiran-2-yl]cyclohexanol (**3**)

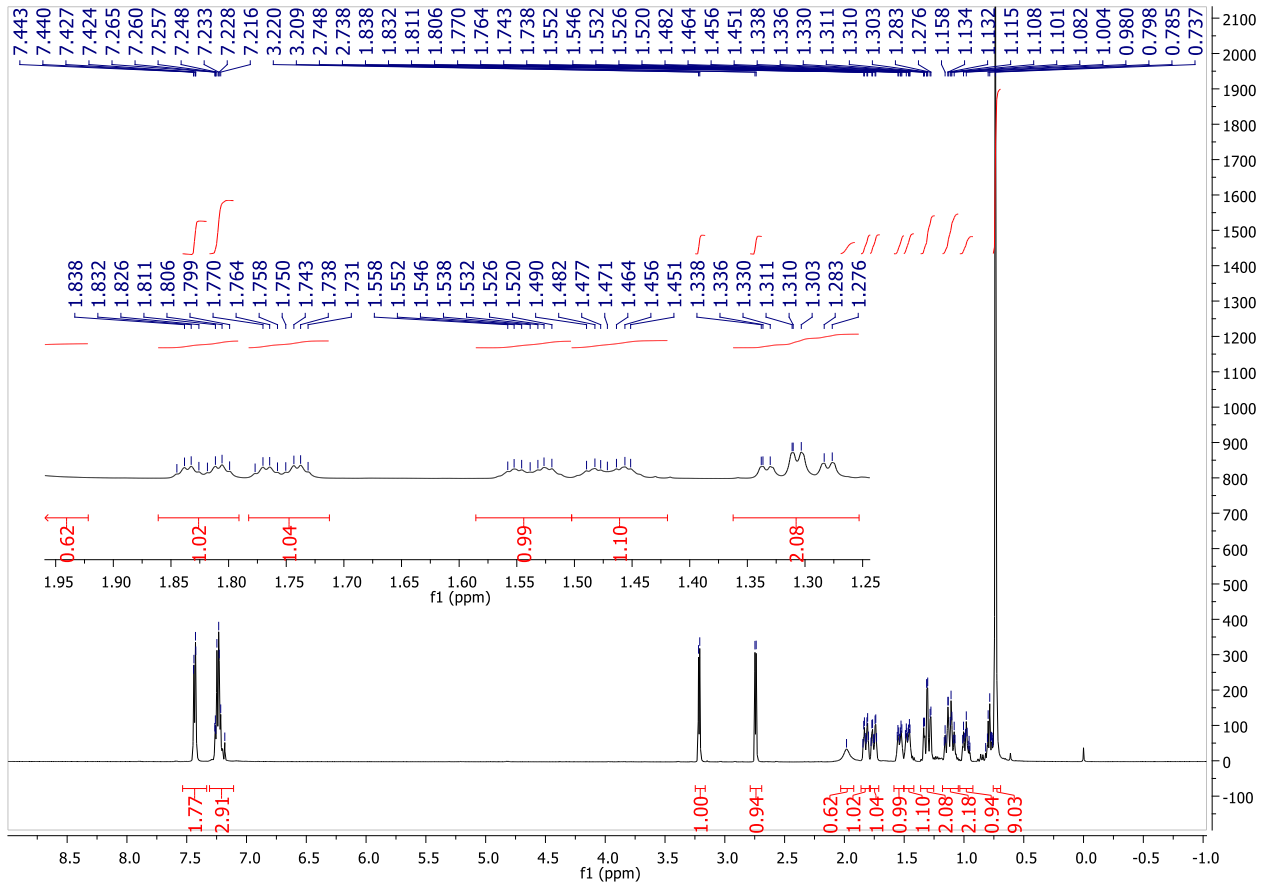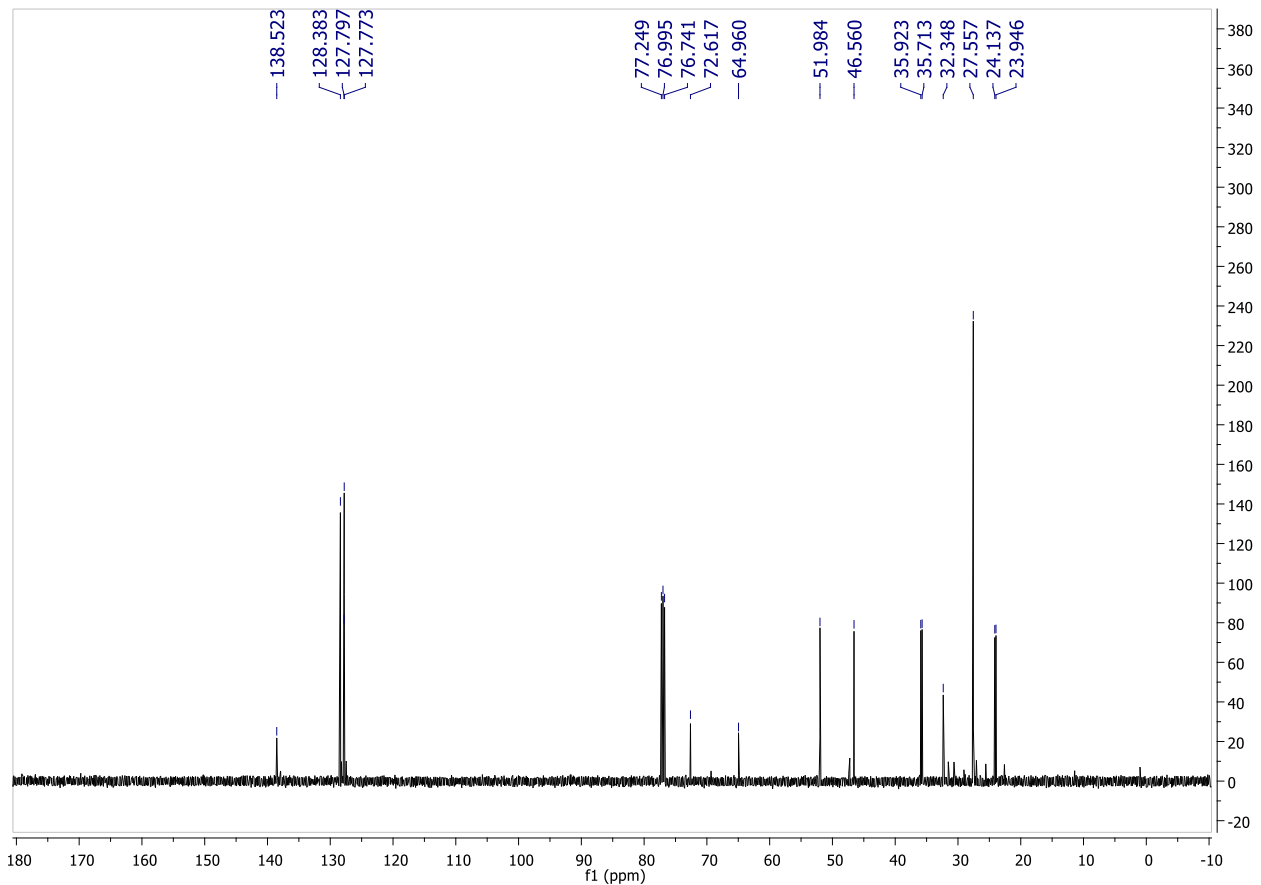

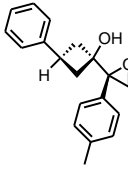

(1s,3S)-1-[(R)-(3-Phenyl-1-(2-p-tolyl-oxiranyl)-cyclobutanol) (**3ab**)

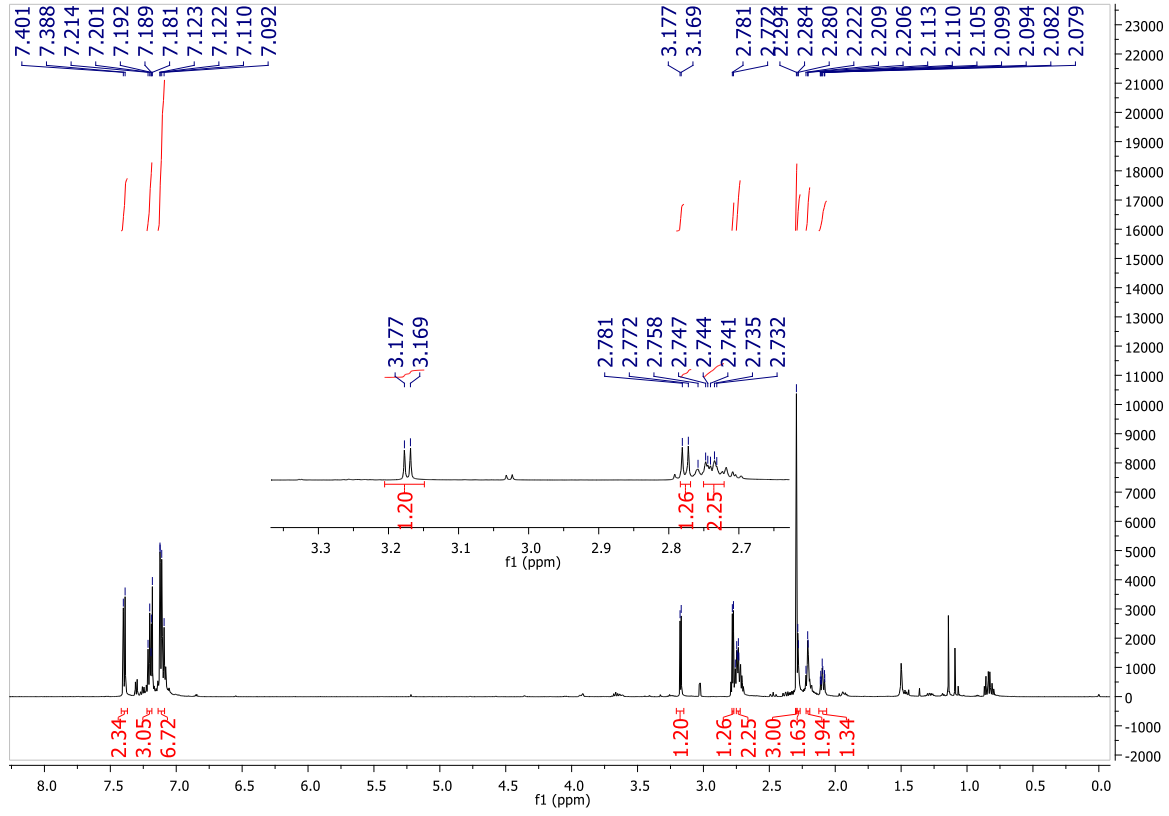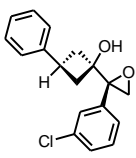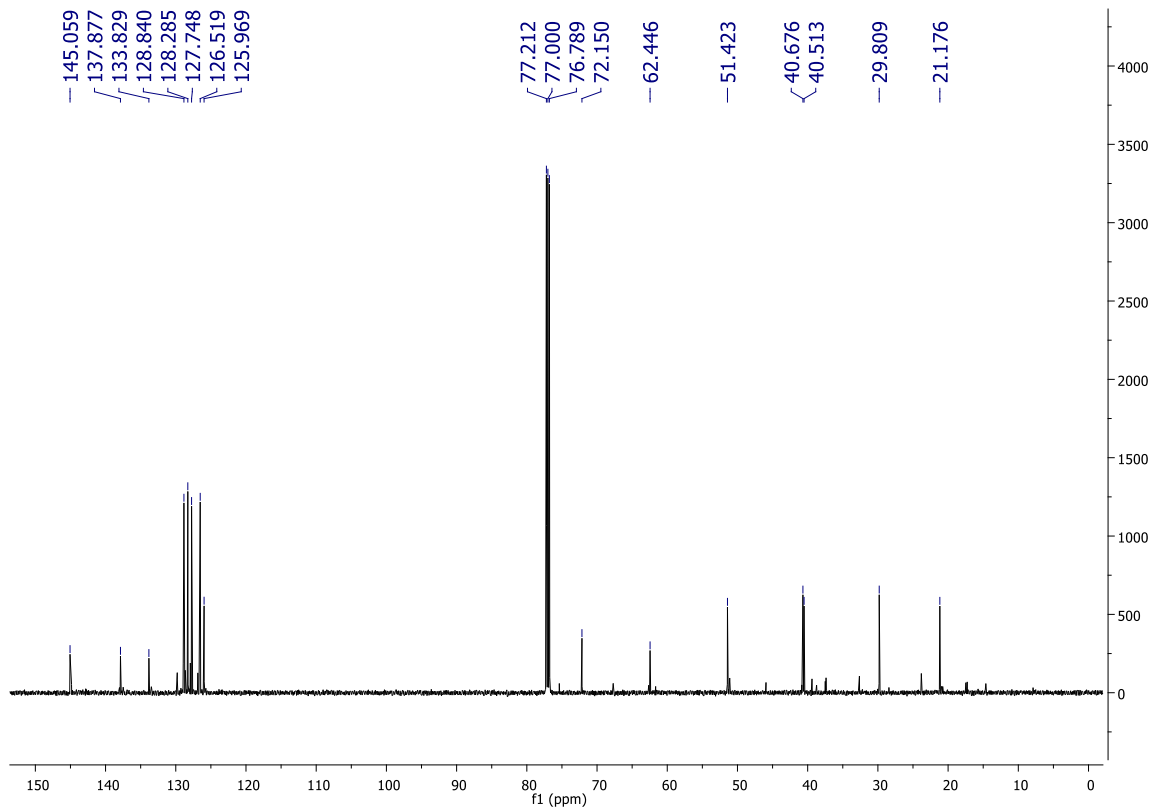

(1*s*,3*s*)-1-[(3-Chloro-phenyl)-oxiranyl]-3-phenyl-cyclobutanol (**3ad**)

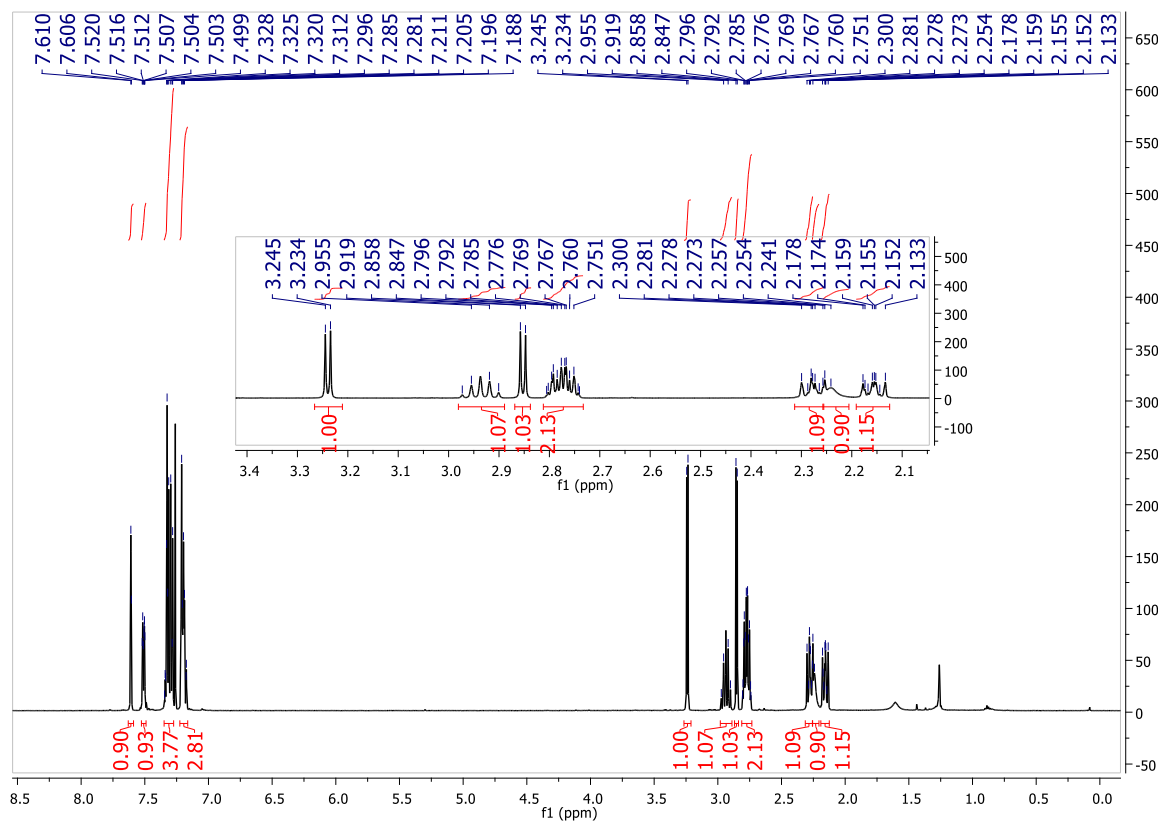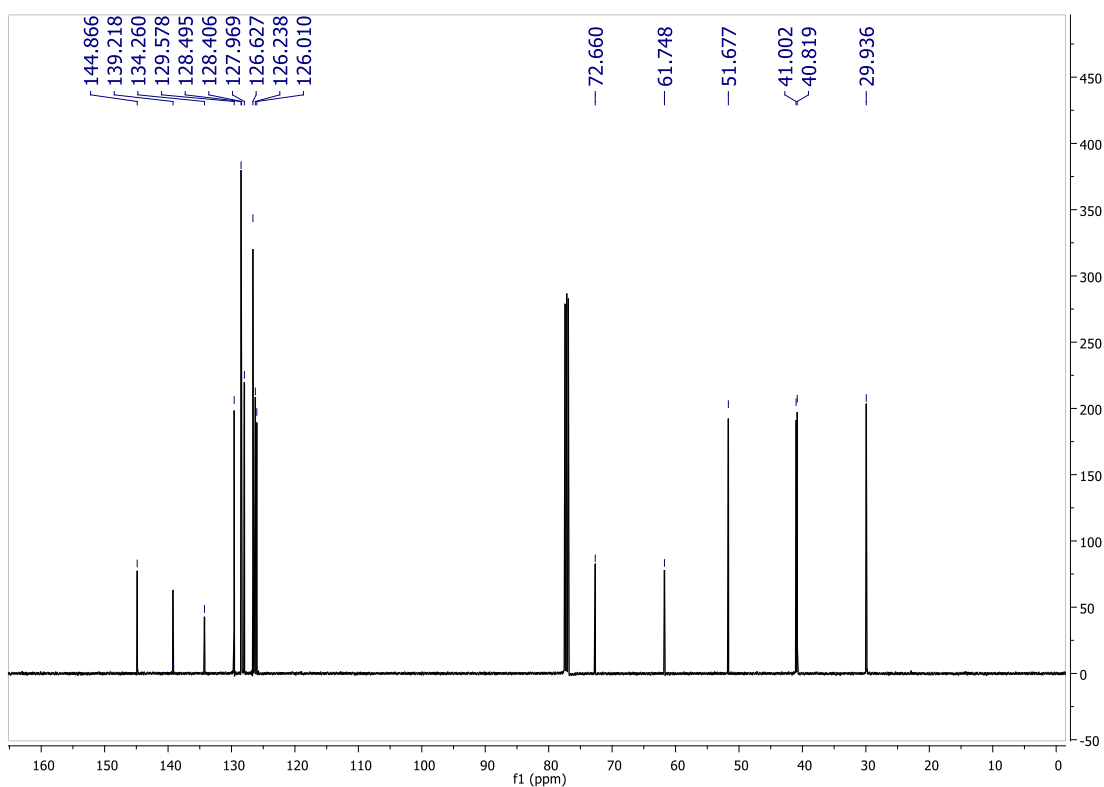

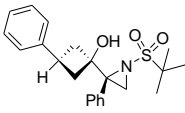

[1-(tert-butylsulfonyl)-2-phenylaziridin-2-yl]-3-phenylcyclobutanol (**6**)

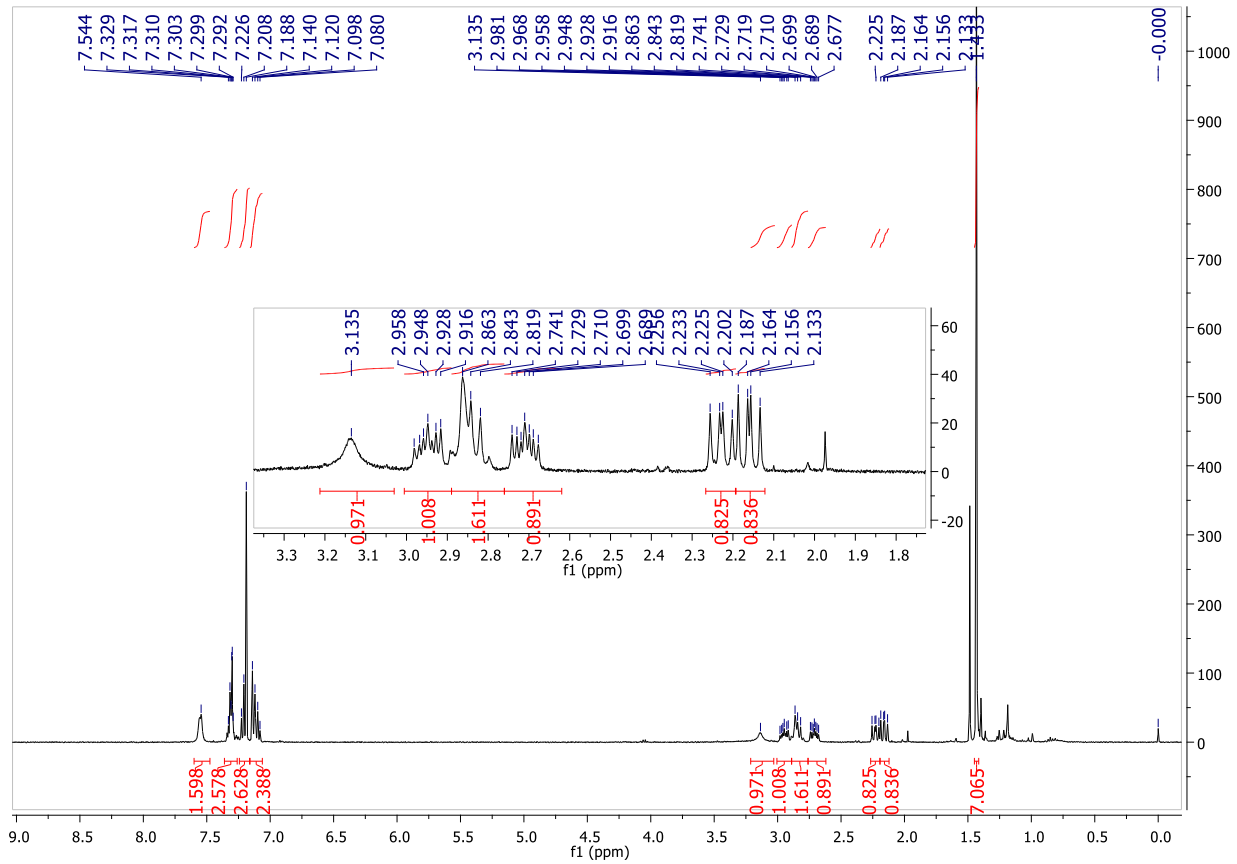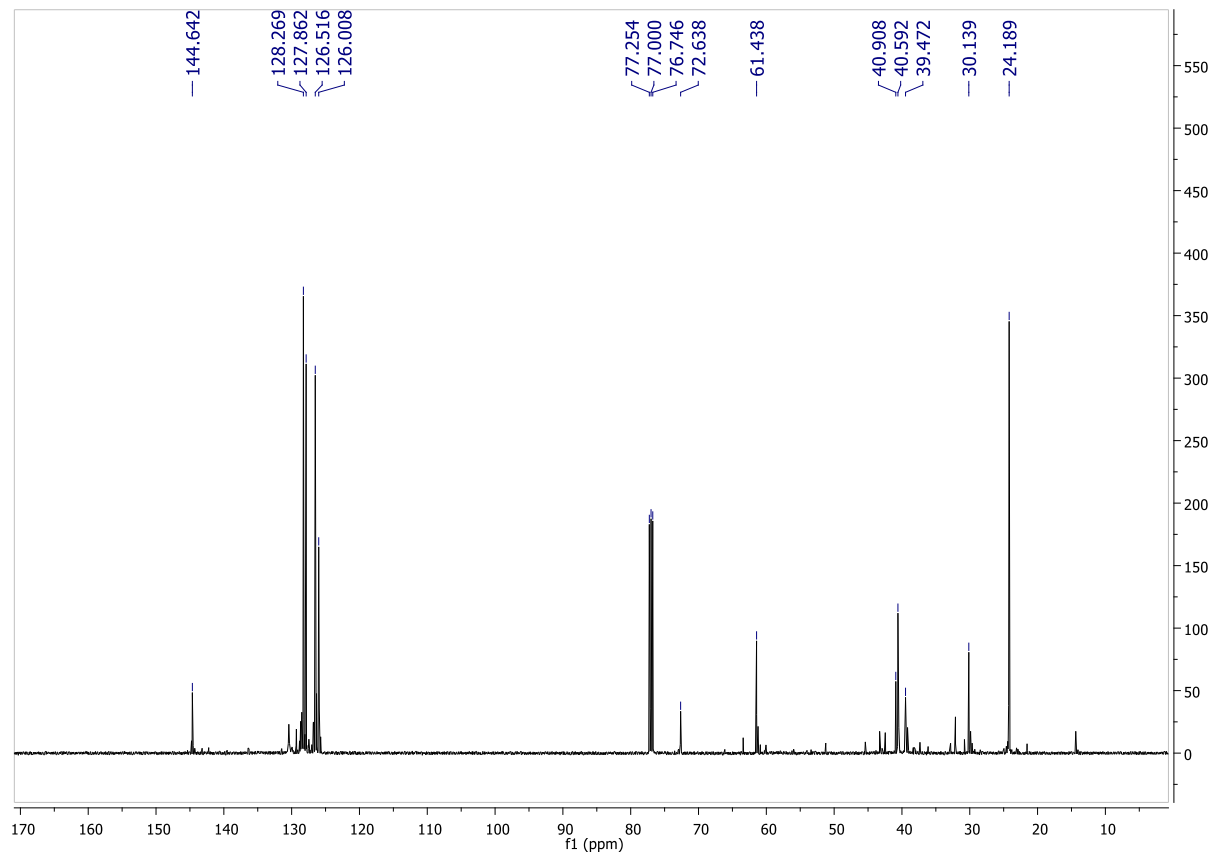



## 8. $^1\text{H}$ and $^{13}\text{C}$ NMR spectra of compounds 4a-k, 4ab, 4ad, 5, and 7

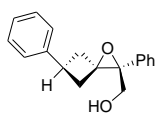

[(2S,3s,5R)-2,5-diphenyl-1-oxaspiro[2.3]hexan-2-yl]methanol (**4a**)

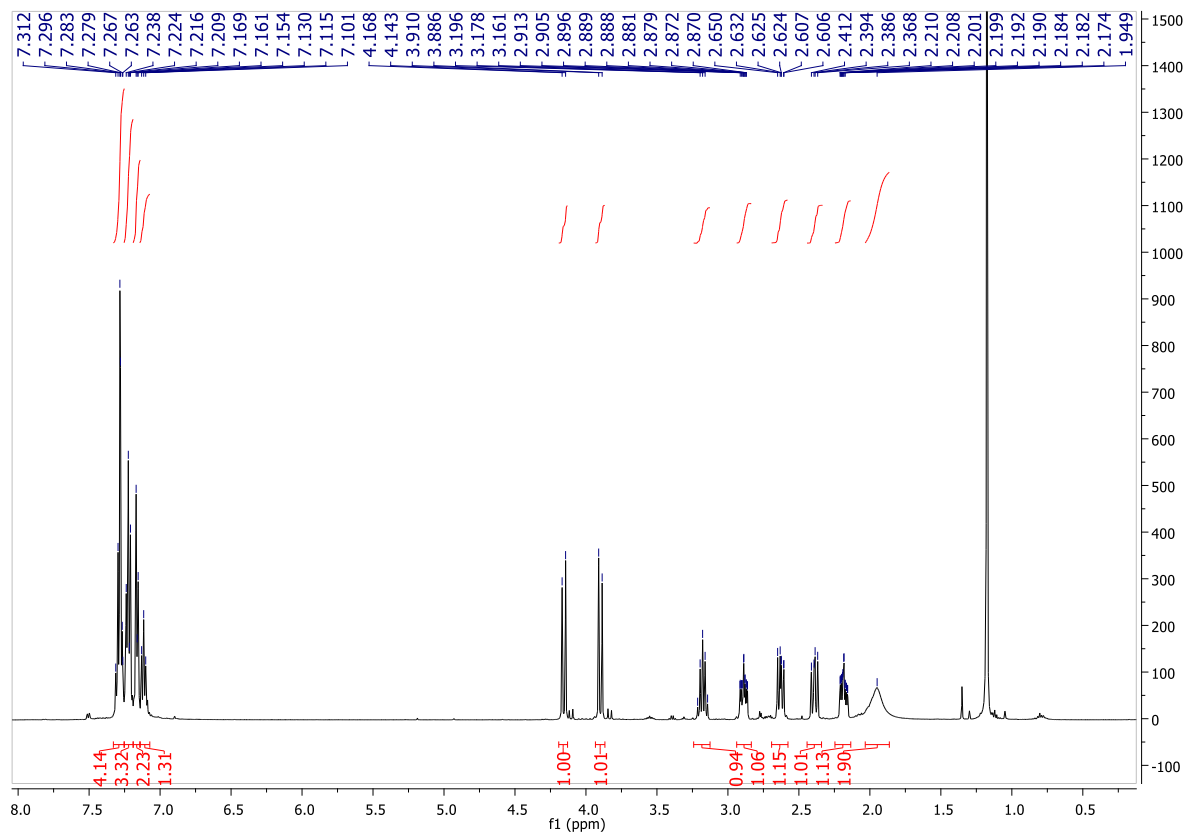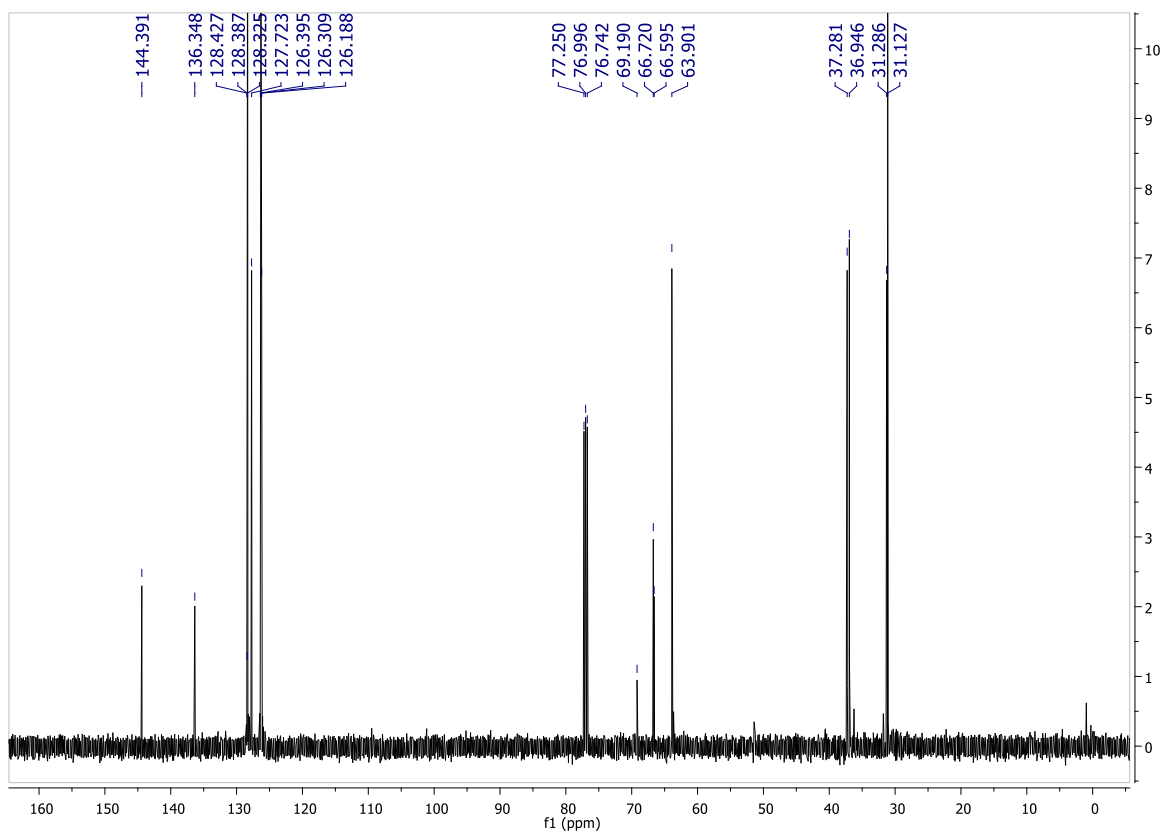

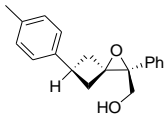

[(2S,3S,5R)-2-Phenyl-5-(p-tolyl)-1-oxaspiro[2.3]hexan-2-yl]methanol (**4b**)

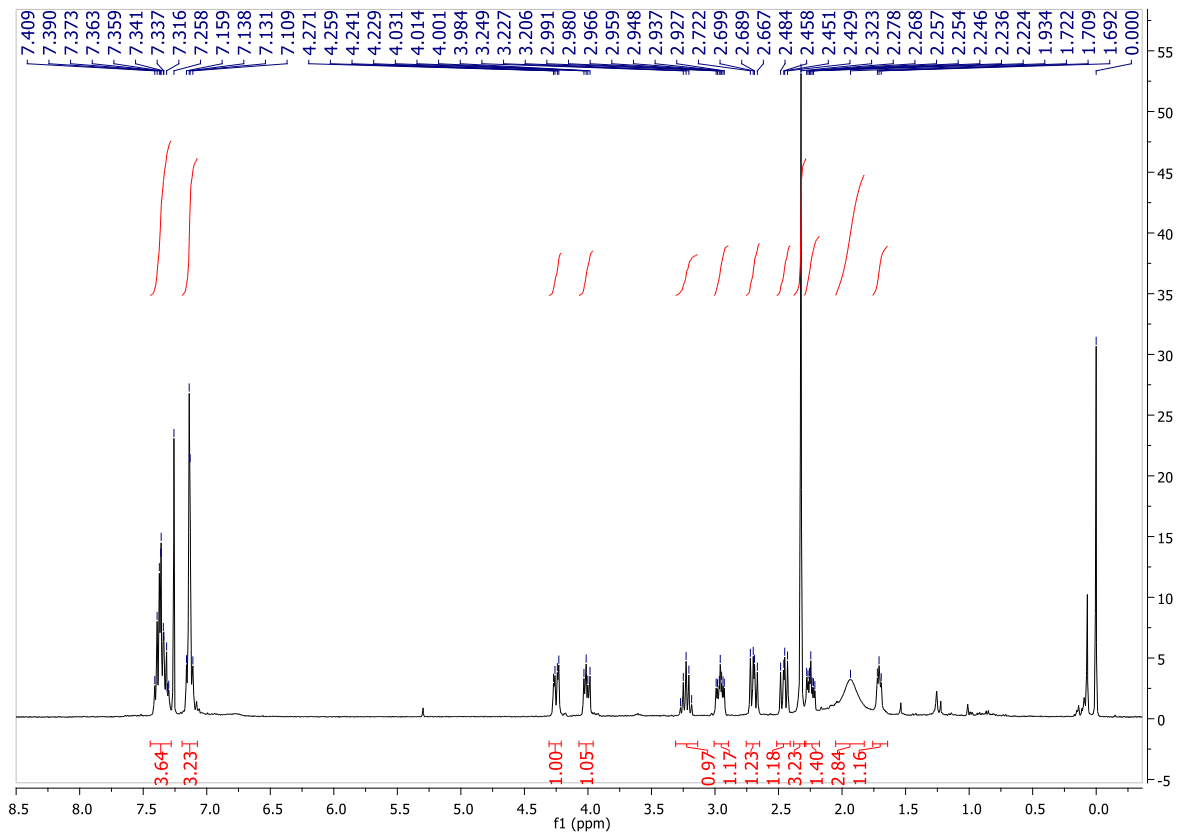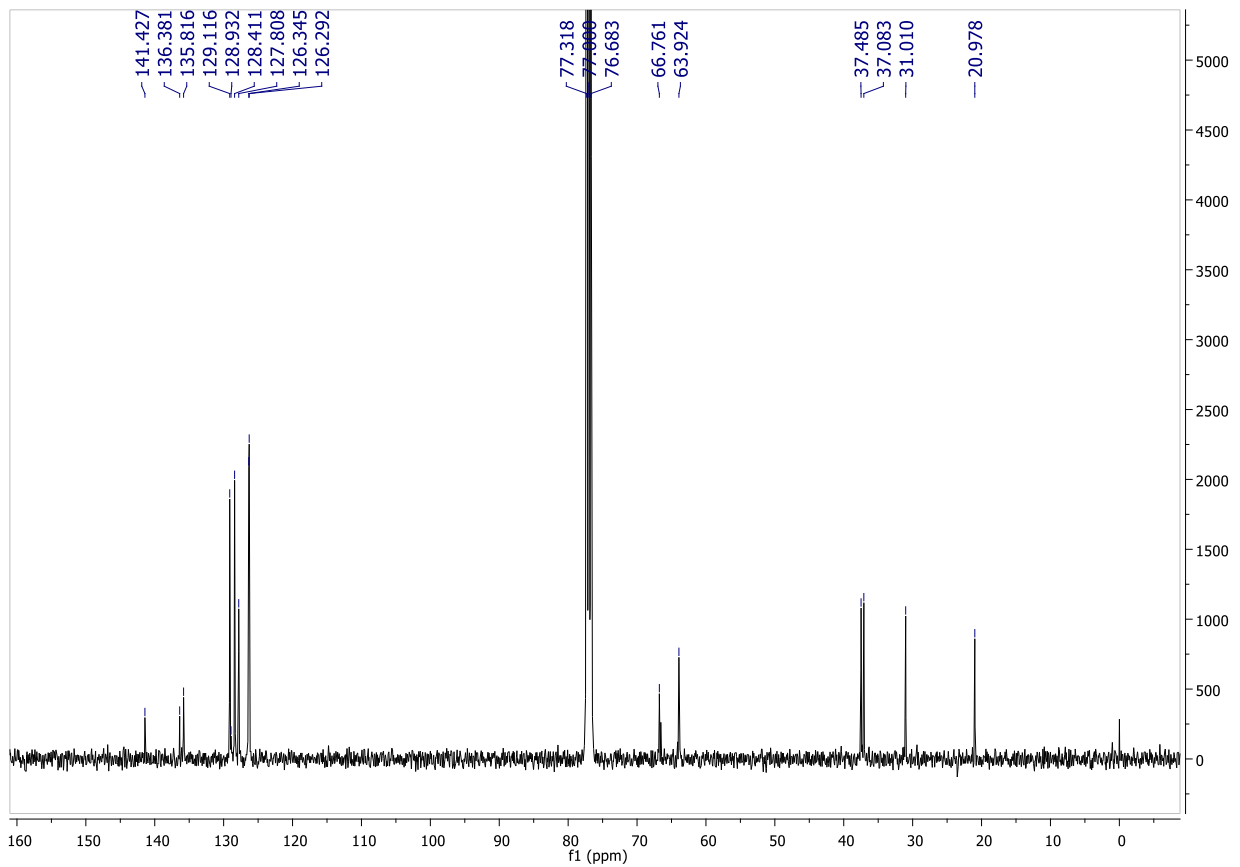

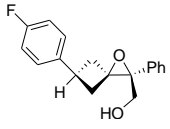

(2S,3s,5R)-[5-(4-Fluorophenyl)-2-phenyl-1-oxaspiro[2.3]hexan-2-yl]methanol (**4c**)

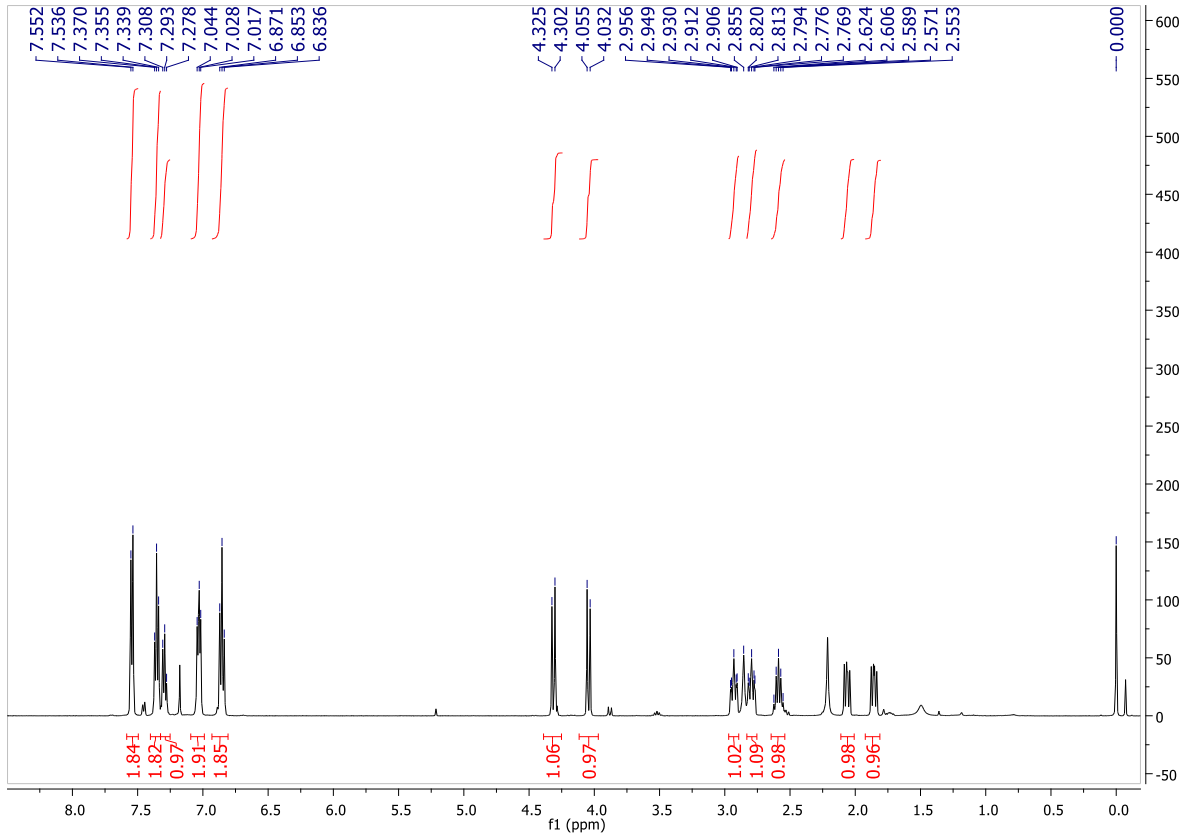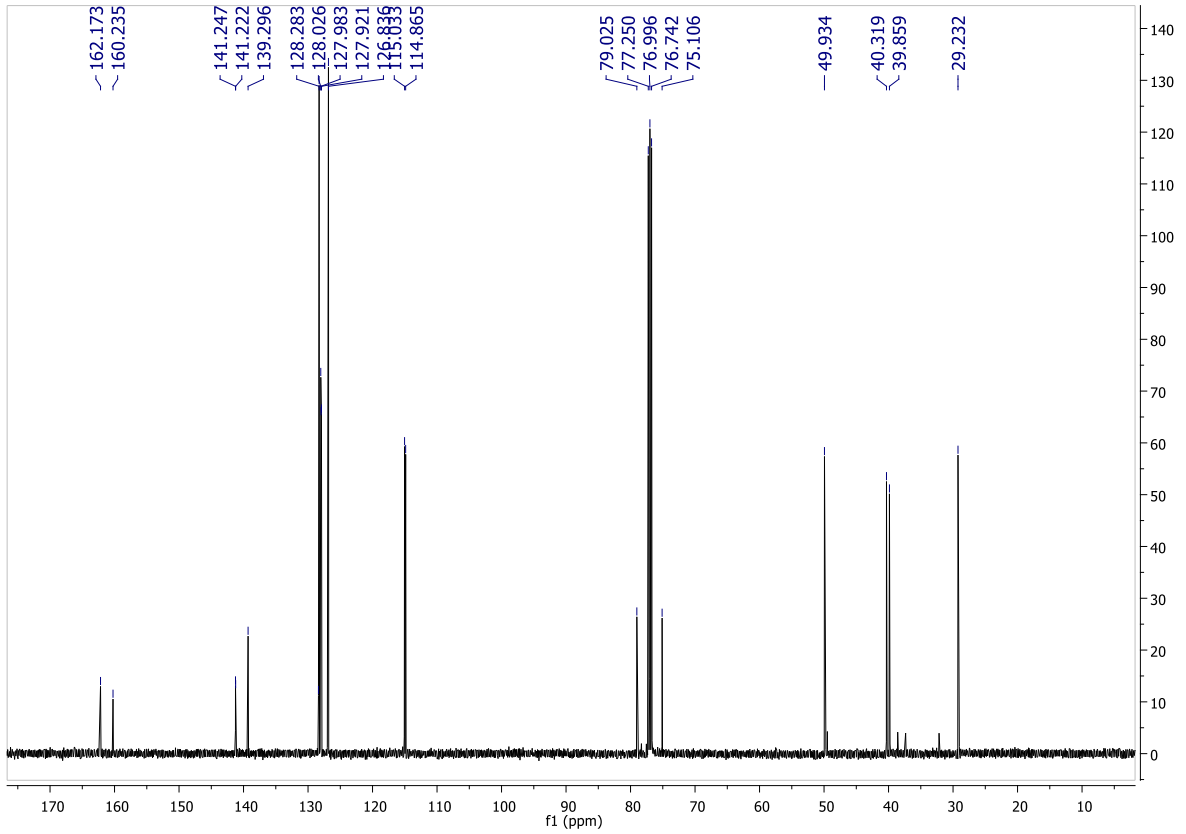

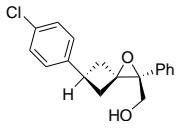

(2S,3s,5R)-[5-(4-Chlorophenyl)-2-phenyl-1-oxaspiro[2.3]hexan-2-yl]methanol (**4d**)

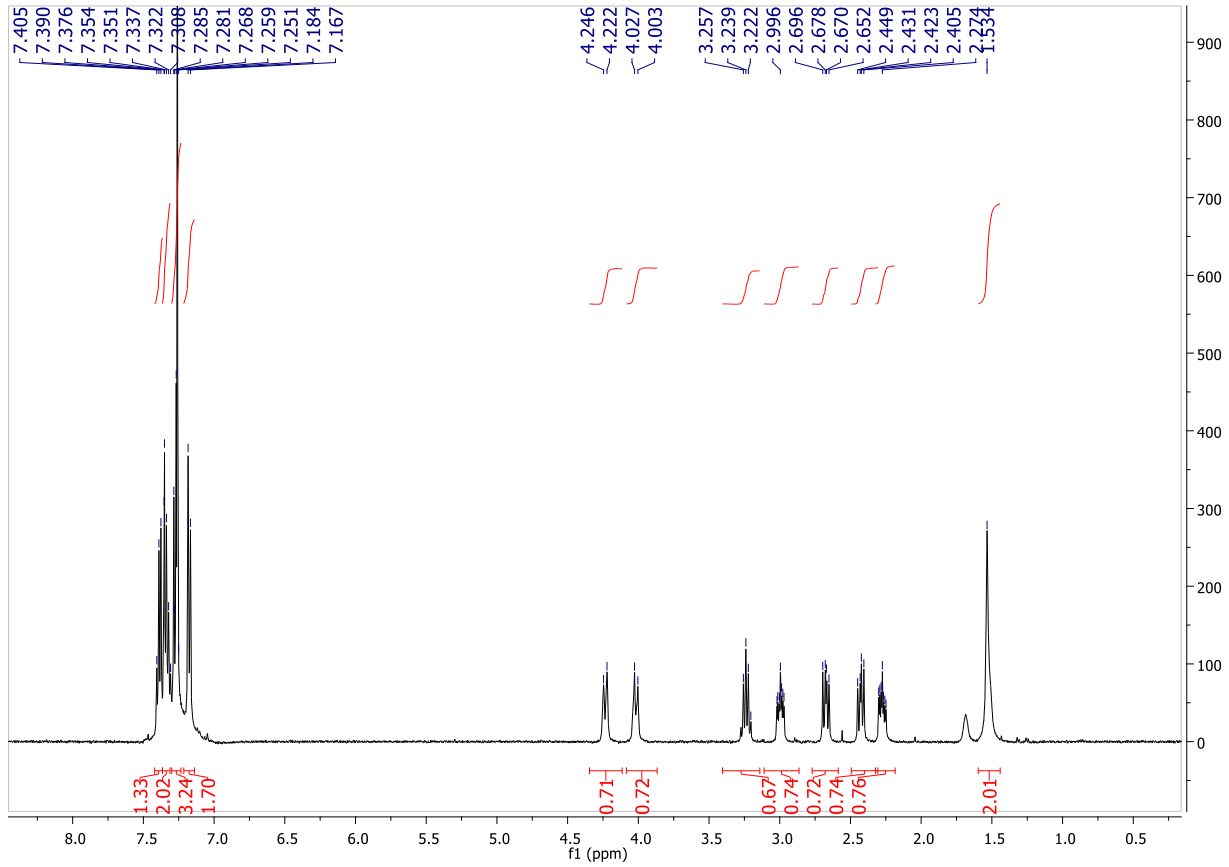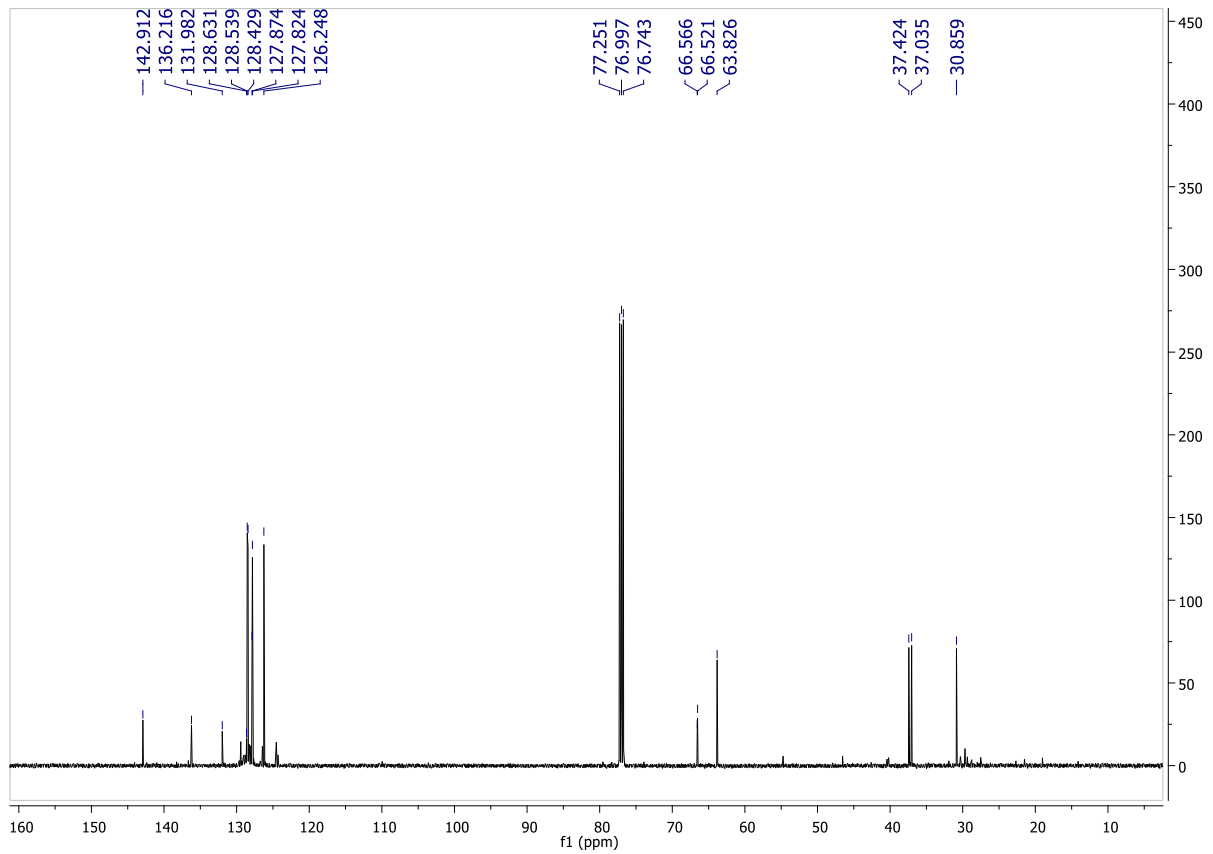



(2S,3s,5R)-[5-(4-Bromophenyl)-2-phenyl-1-oxaspiro[2.3]hexan-2-yl]methanol (**4e**)

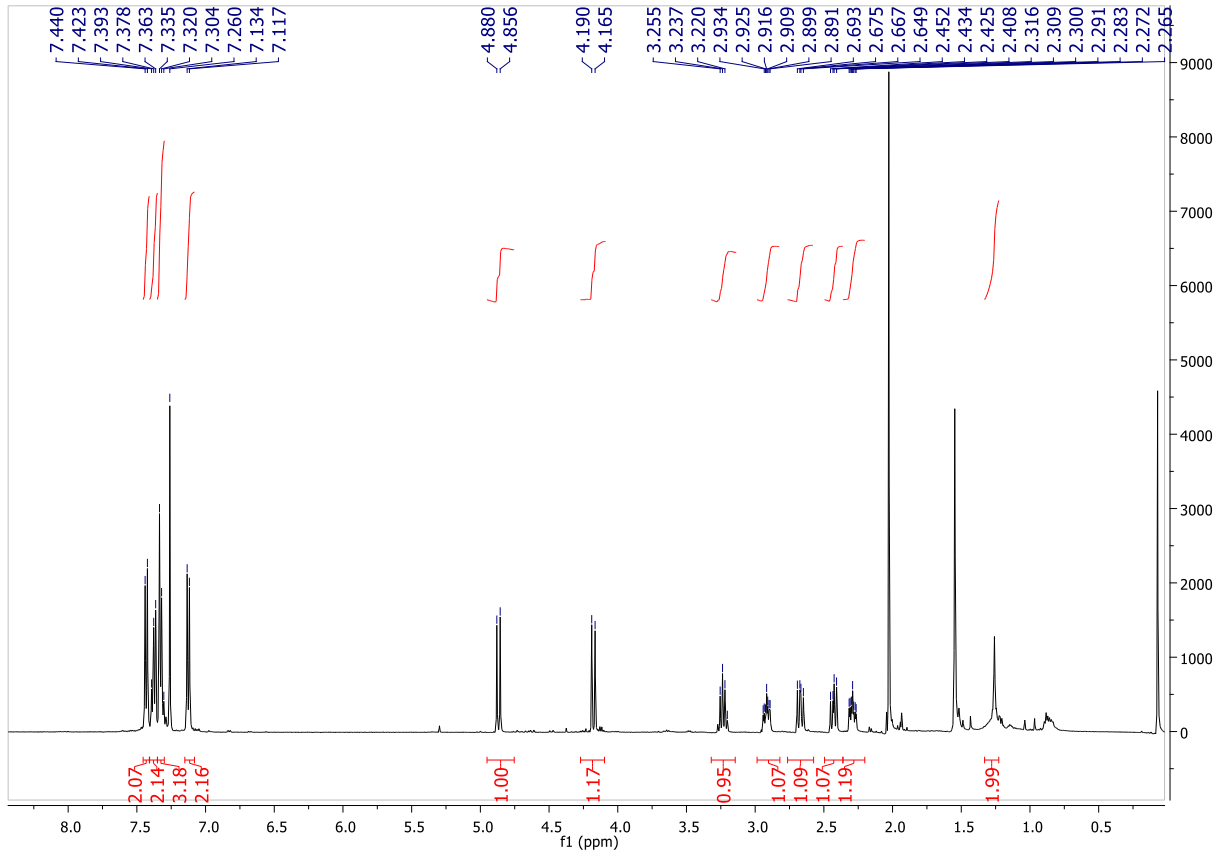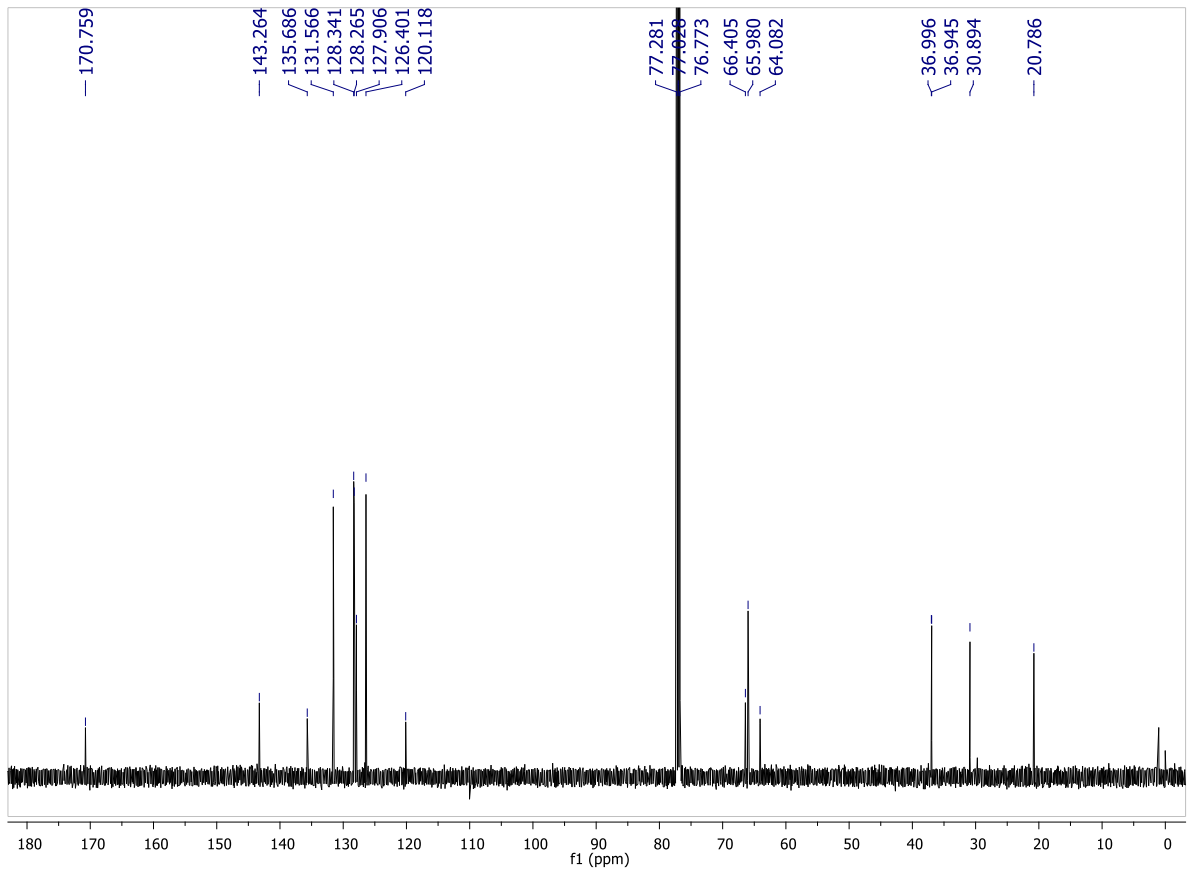

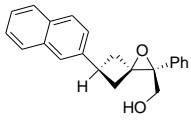

[(2S,3s,5R)-5-(Naphthalen-2-yl)-2-phenyl-1-oxaspiro[2.3]hexan-2-yl)methanol (**4f**)

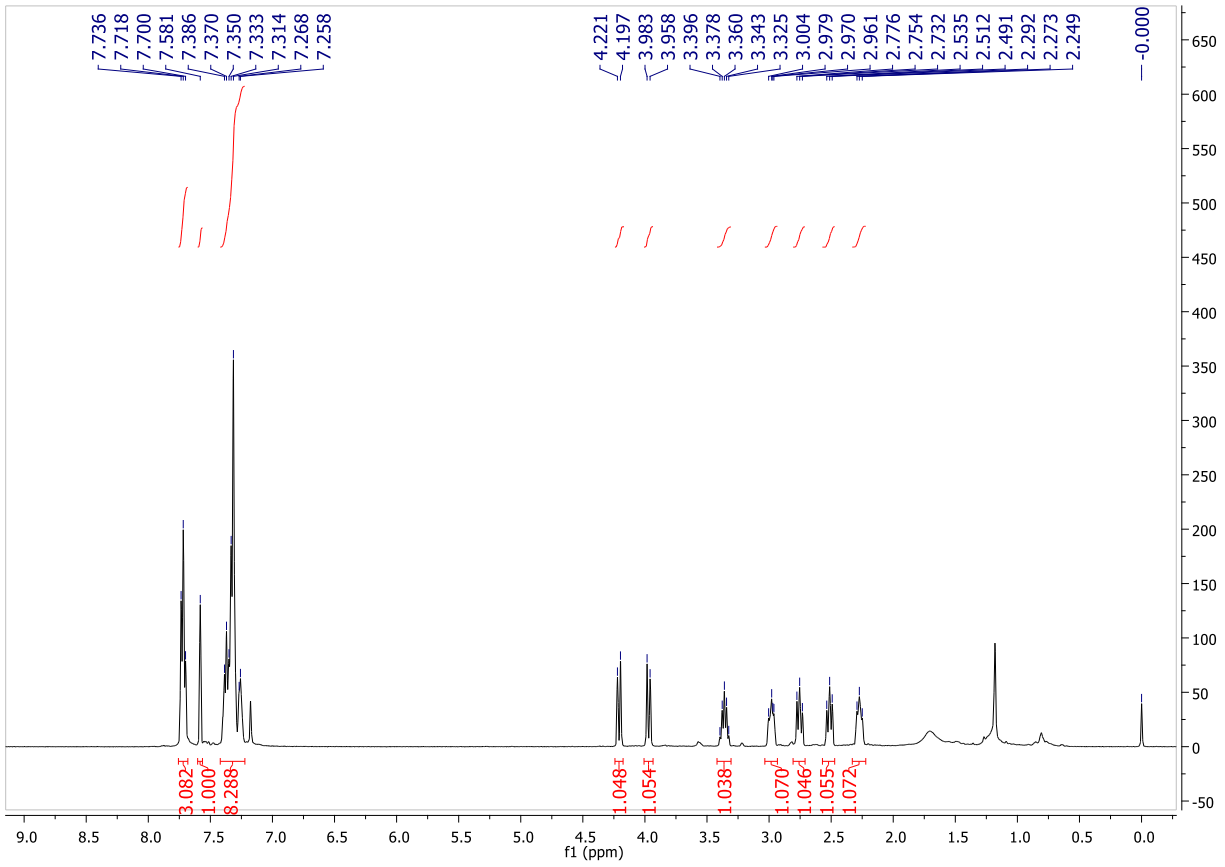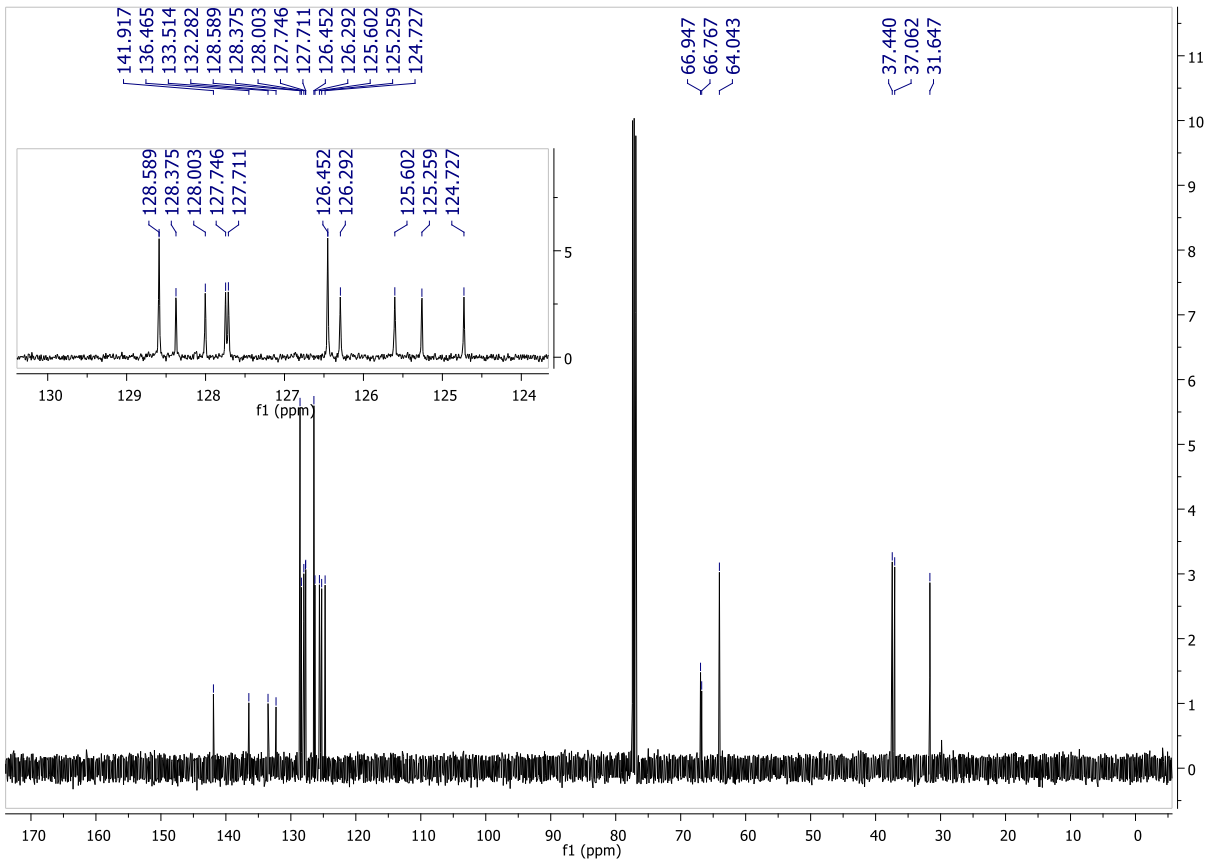

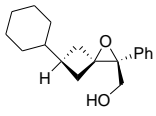

[(2S,3s,5R)-5-Cyclohexyl-2-phenyl-1-oxa-spiro[2.3]hexan-2-yl]methanol (**4g**)

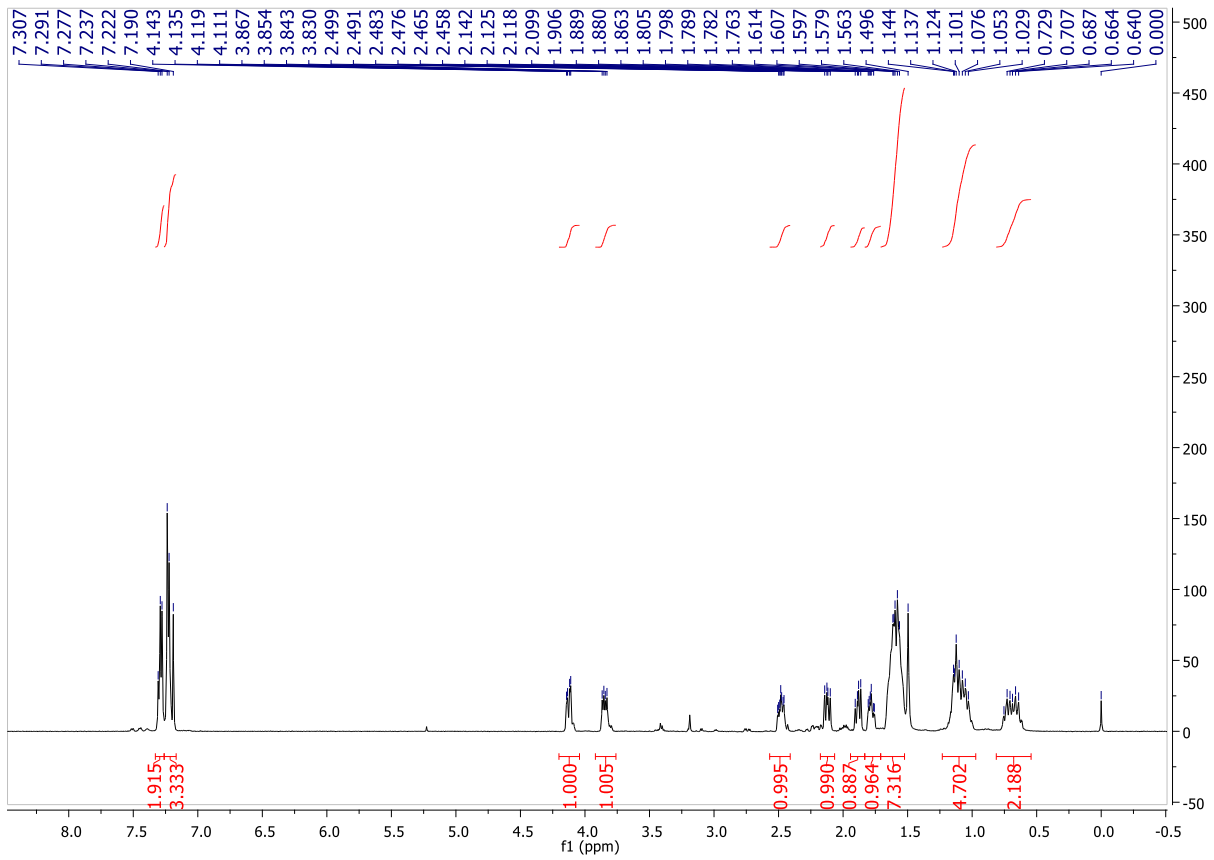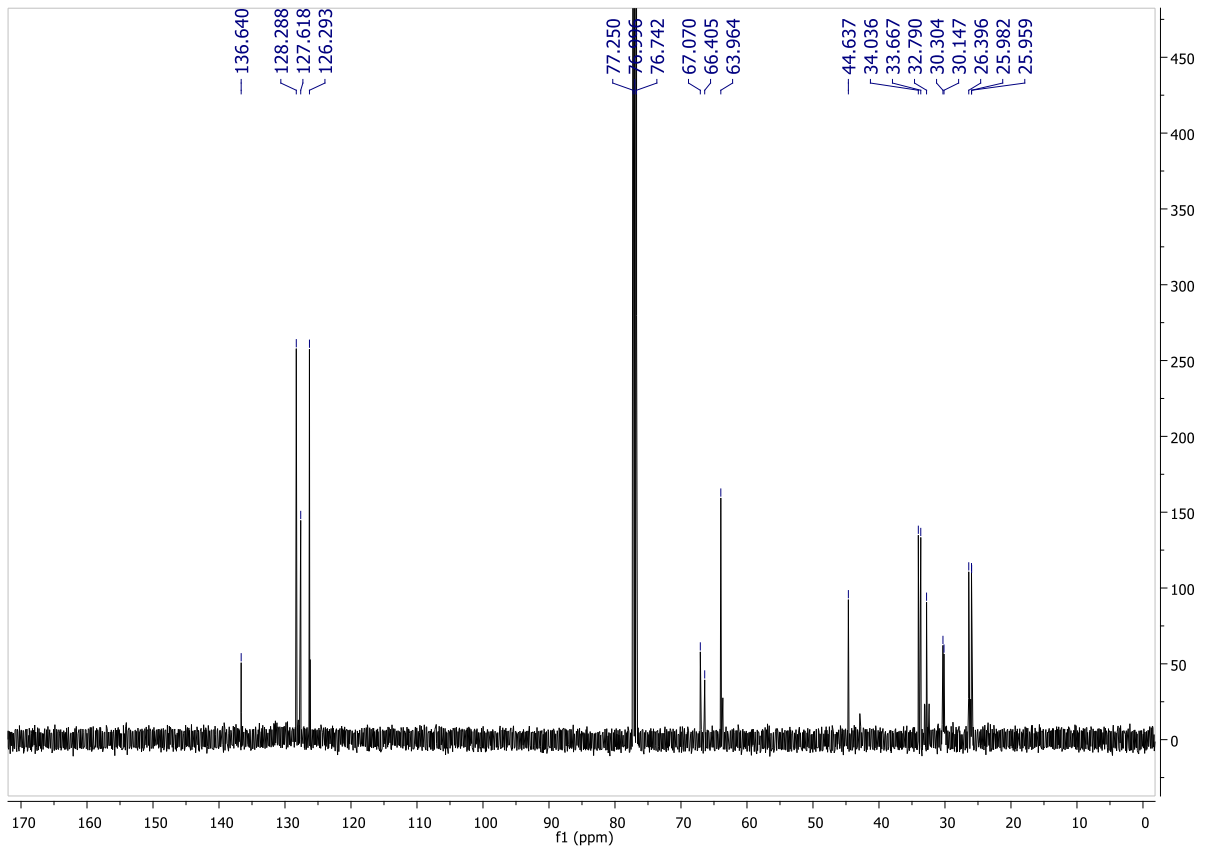

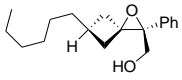

[(2*S*,3*s*,5*R*)-5-Hexyl-2-phenyl-1-oxa-spiro[2.3]hexan-2-yl]methanol (**4h**)

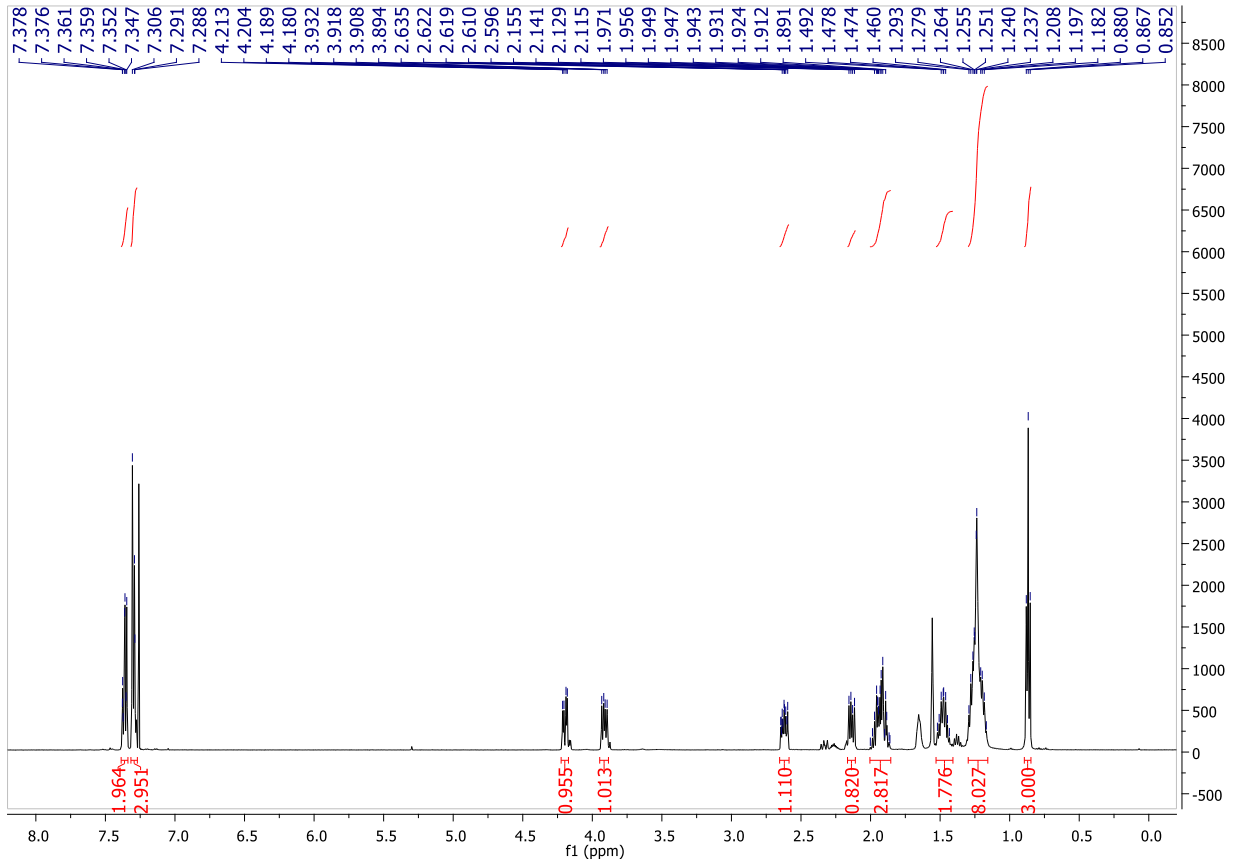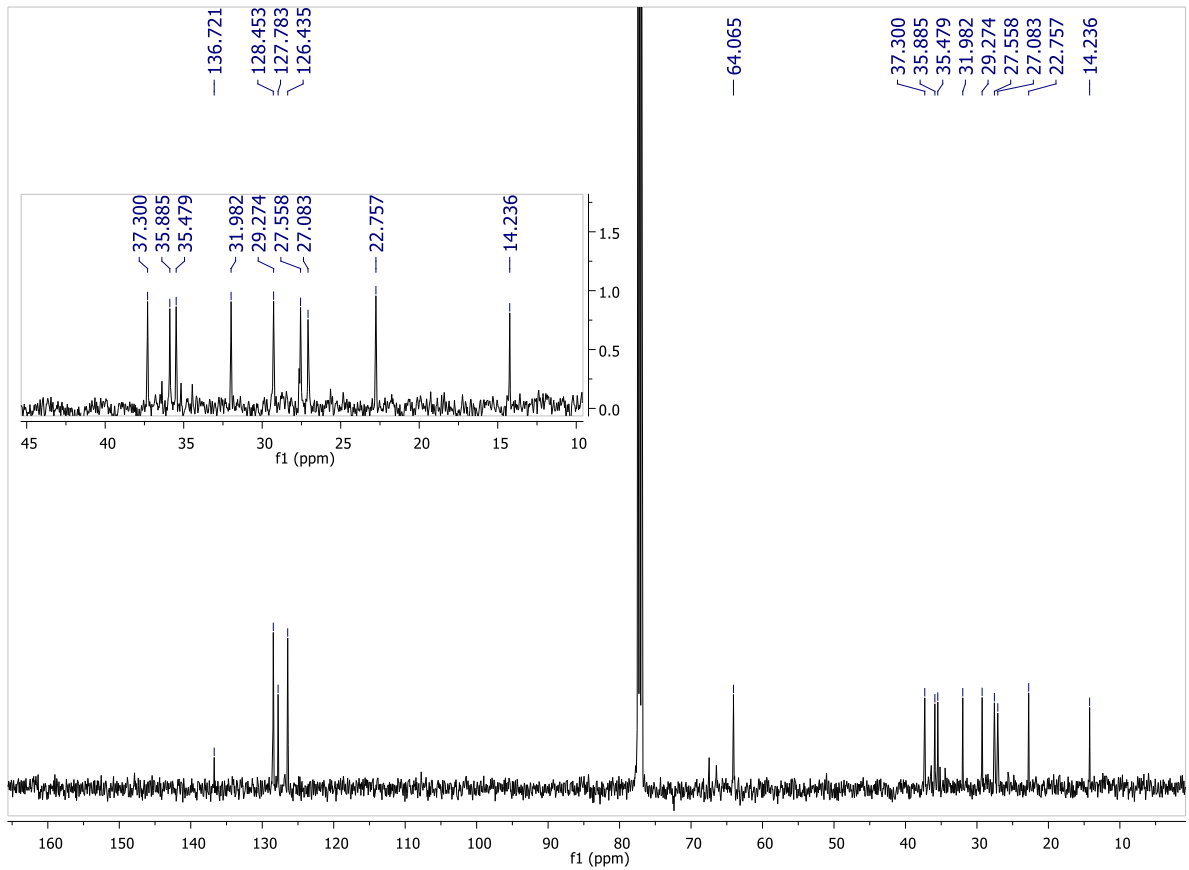



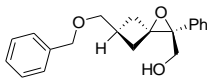

[(2S,3s,5R)-5-(benzyloxy)methyl]-2-phenyl-1-oxaspiro[2.3]hexan-2-ylmethanol (**4i**)

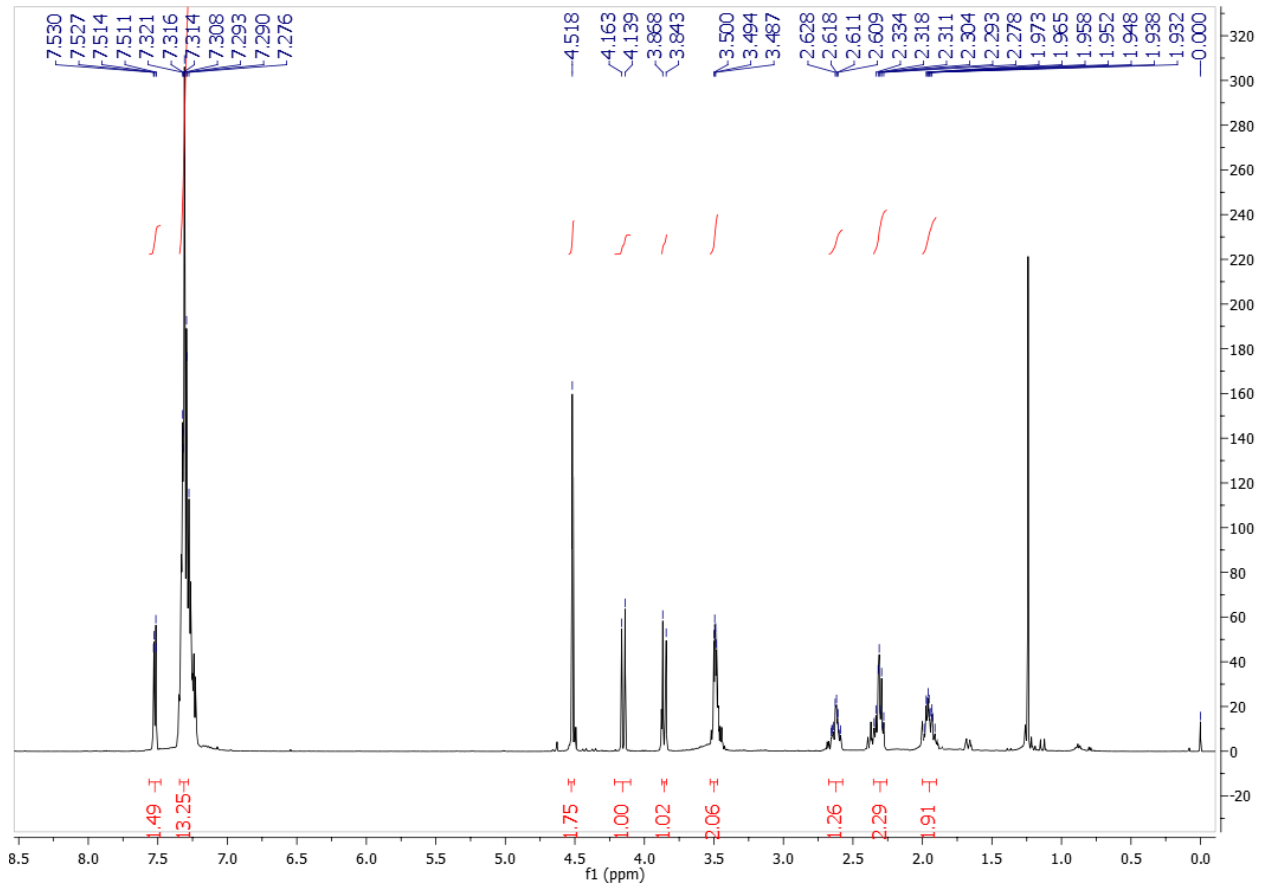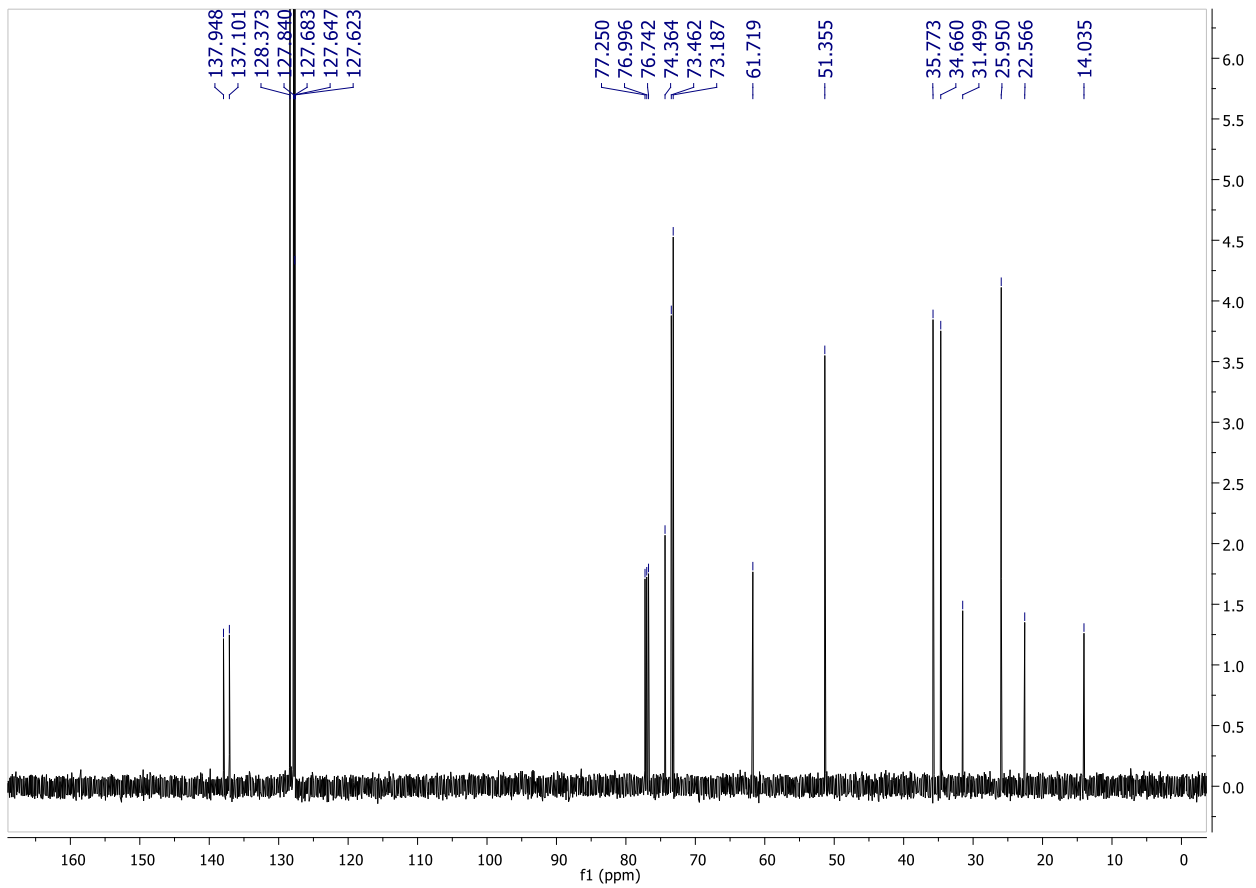

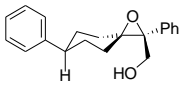

[(2S,3s,6R)-2,6-Diphenyl-1-oxaspiro[2.5]octan-2-yl)methanol (**4k**)

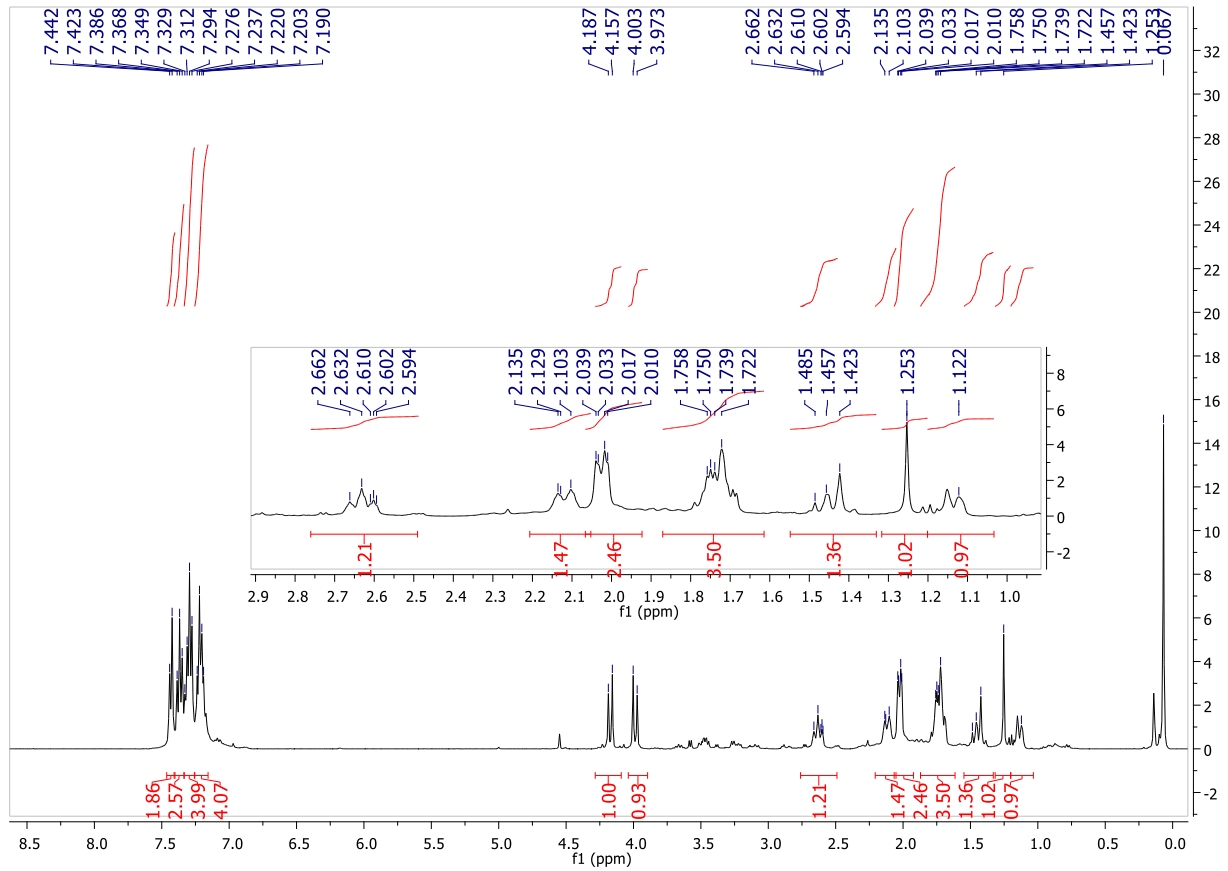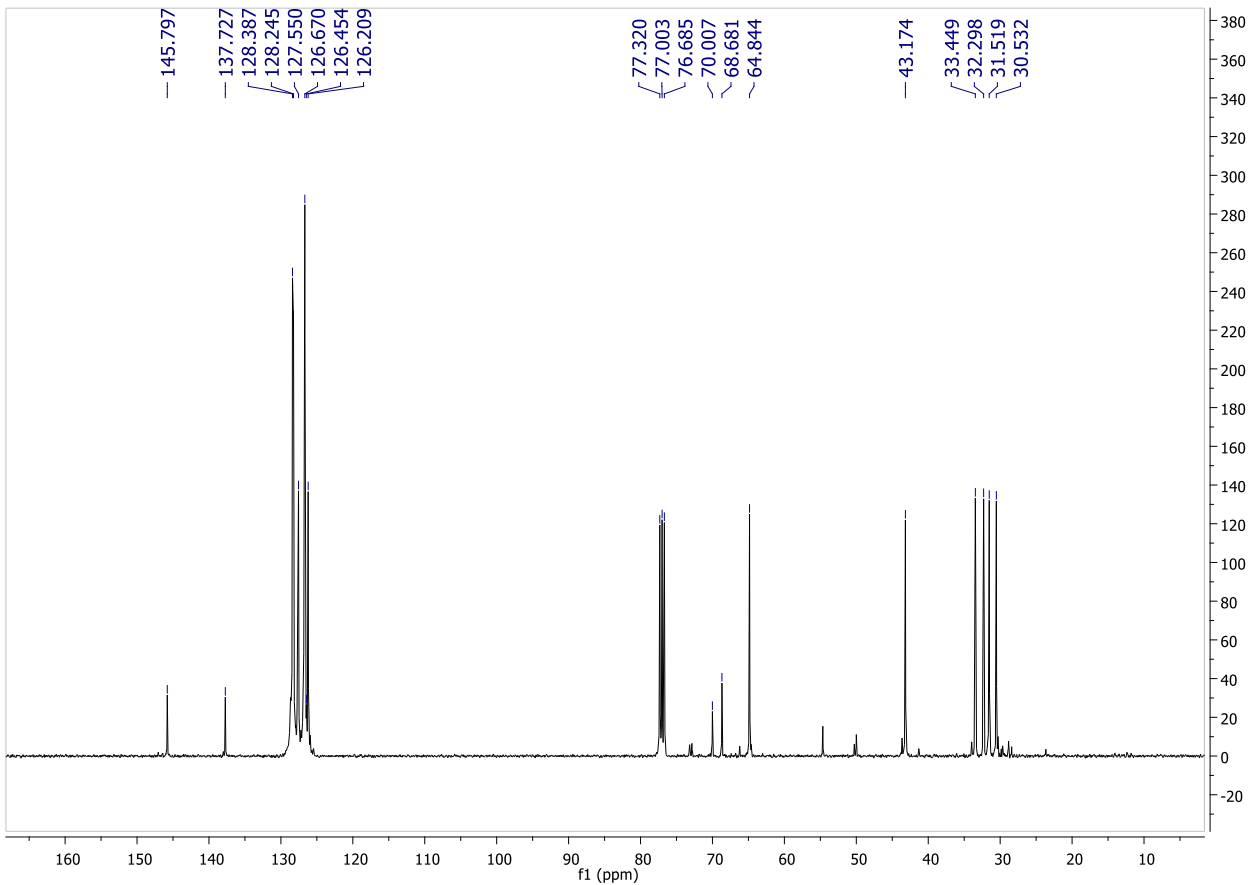

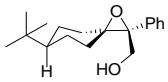

[(2S,3s,6R)-6-(tert-Butyl)-2-phenyl-1-oxaspiro[2.5]octan-2-yl]methanol (**4**)

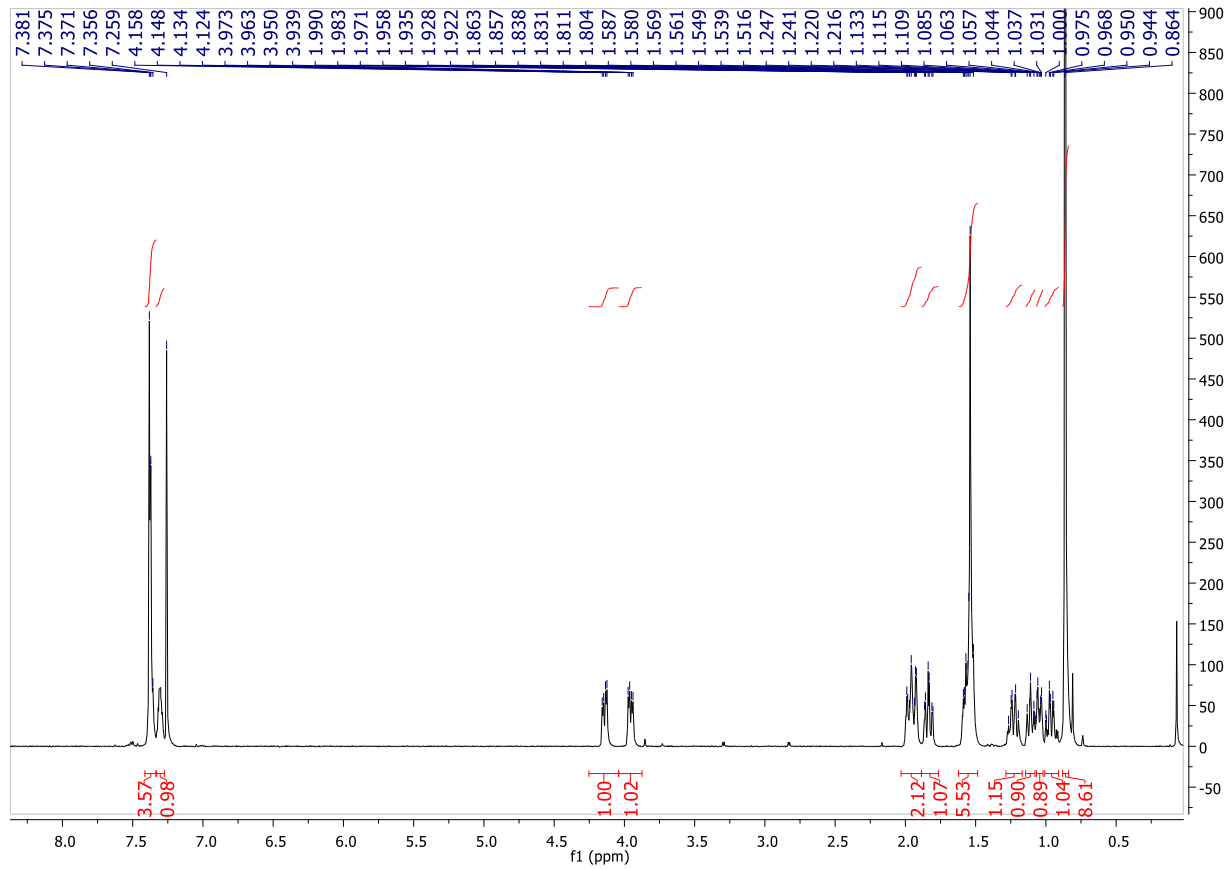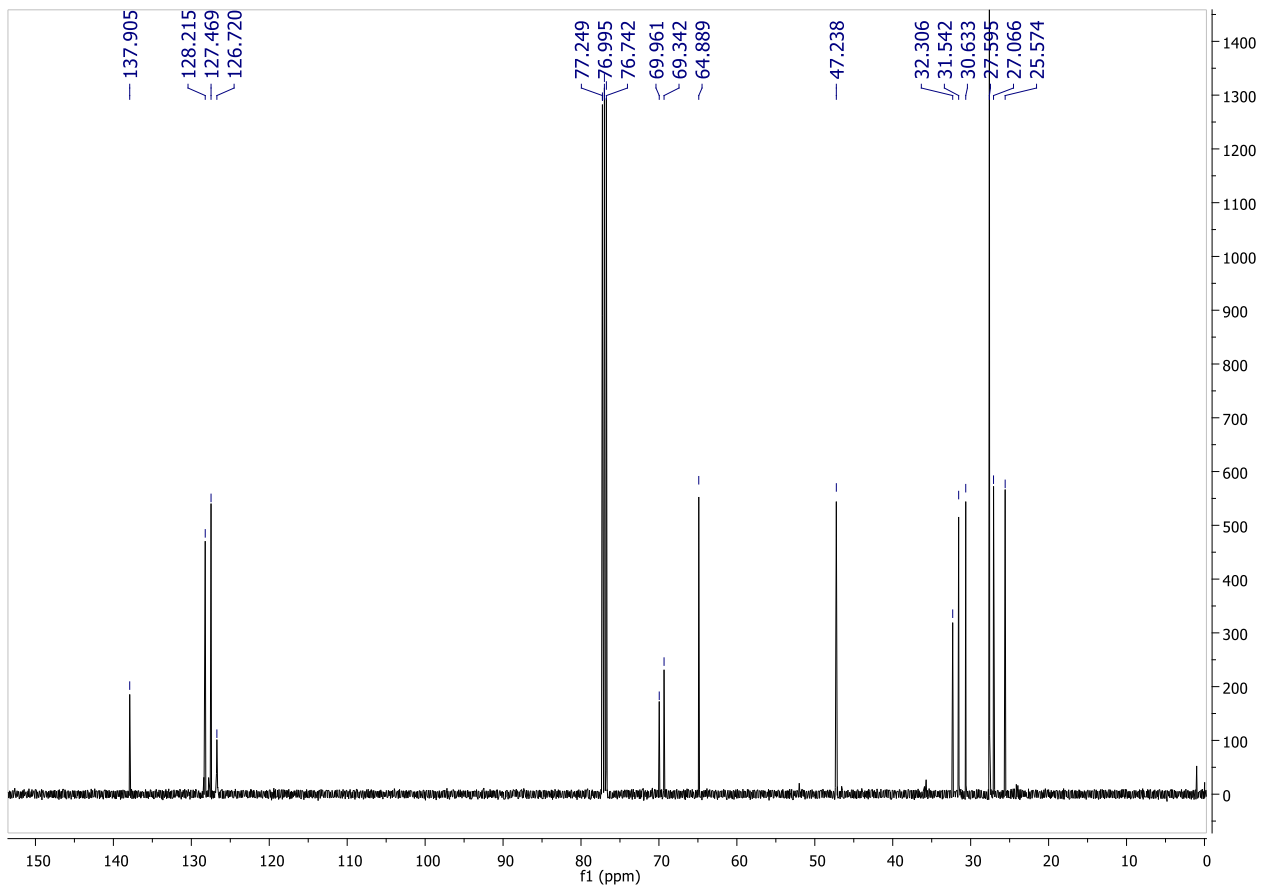

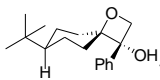

7-tert-Butyl-3-phenyl-1-oxaspiro[3.5]nonan-3-ol (5)

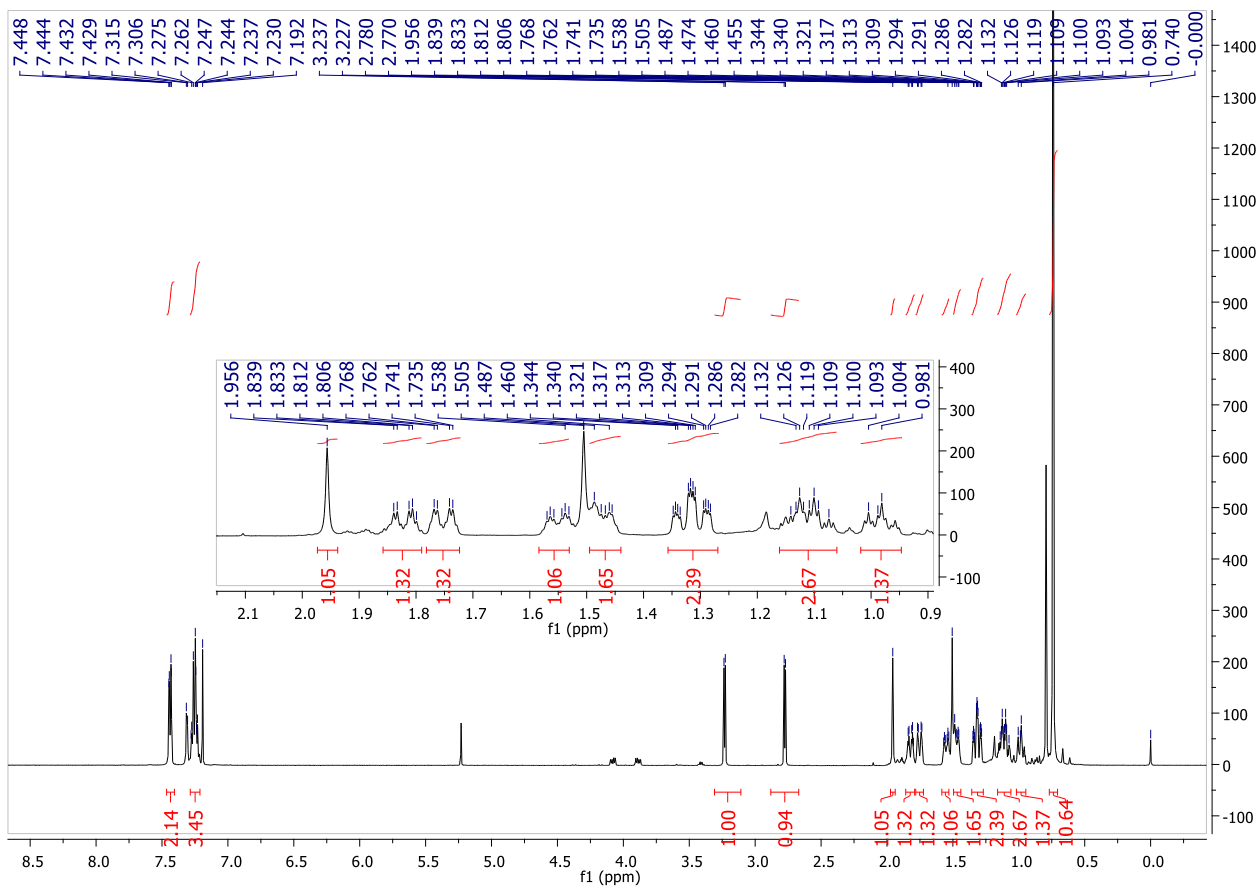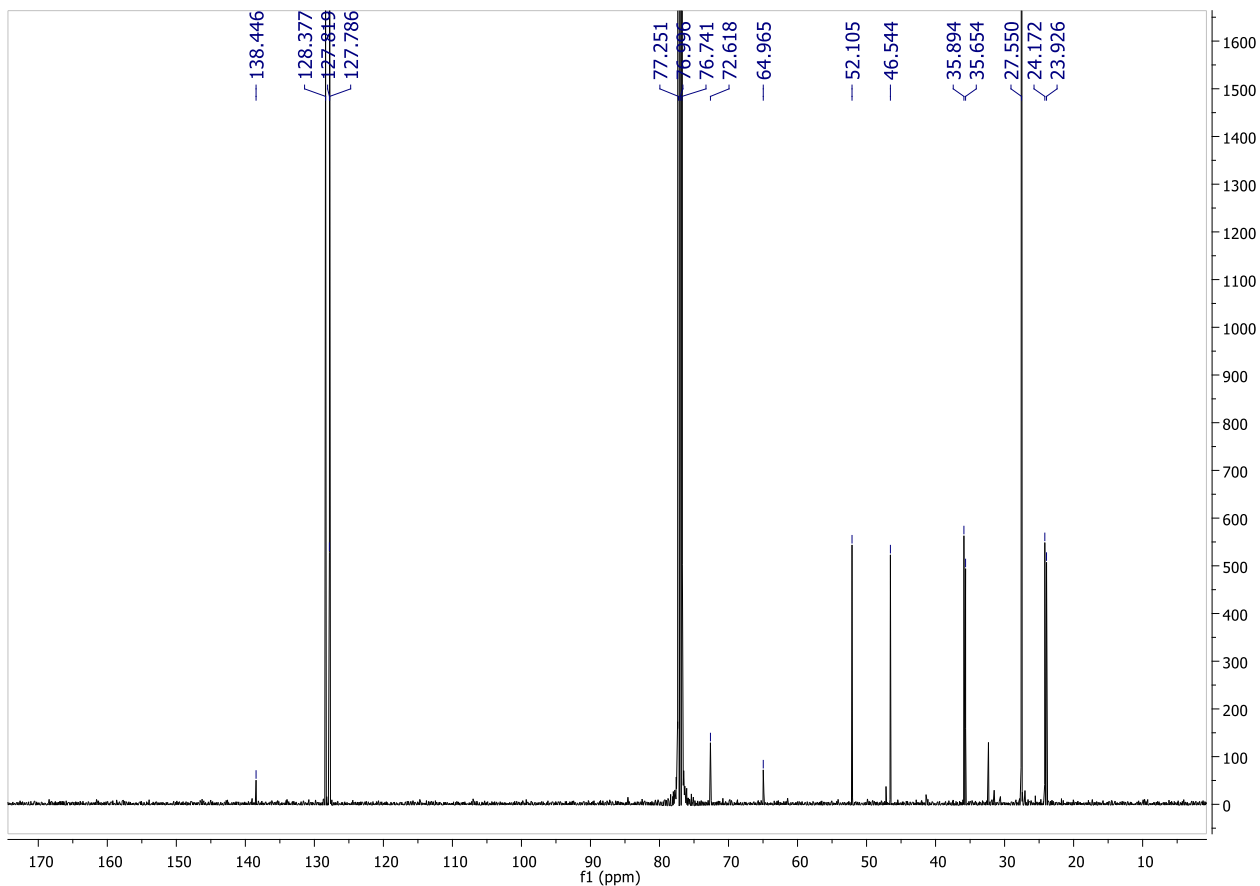

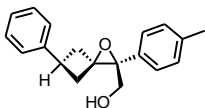

[(2S,3s,5R)-(5-Phenyl-2-p-tolyl-1-oxa-spiro[2.3]hex-2-yl)-methanol (**4ab**)

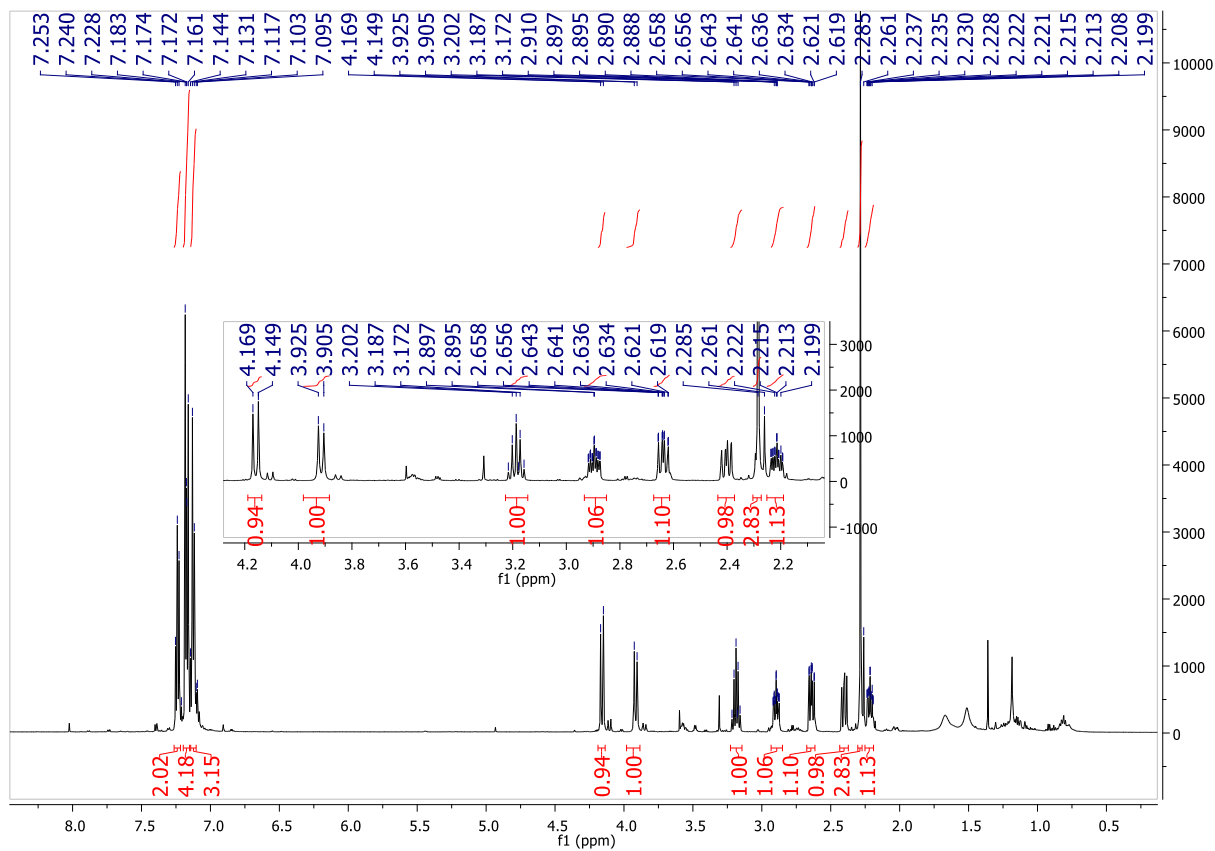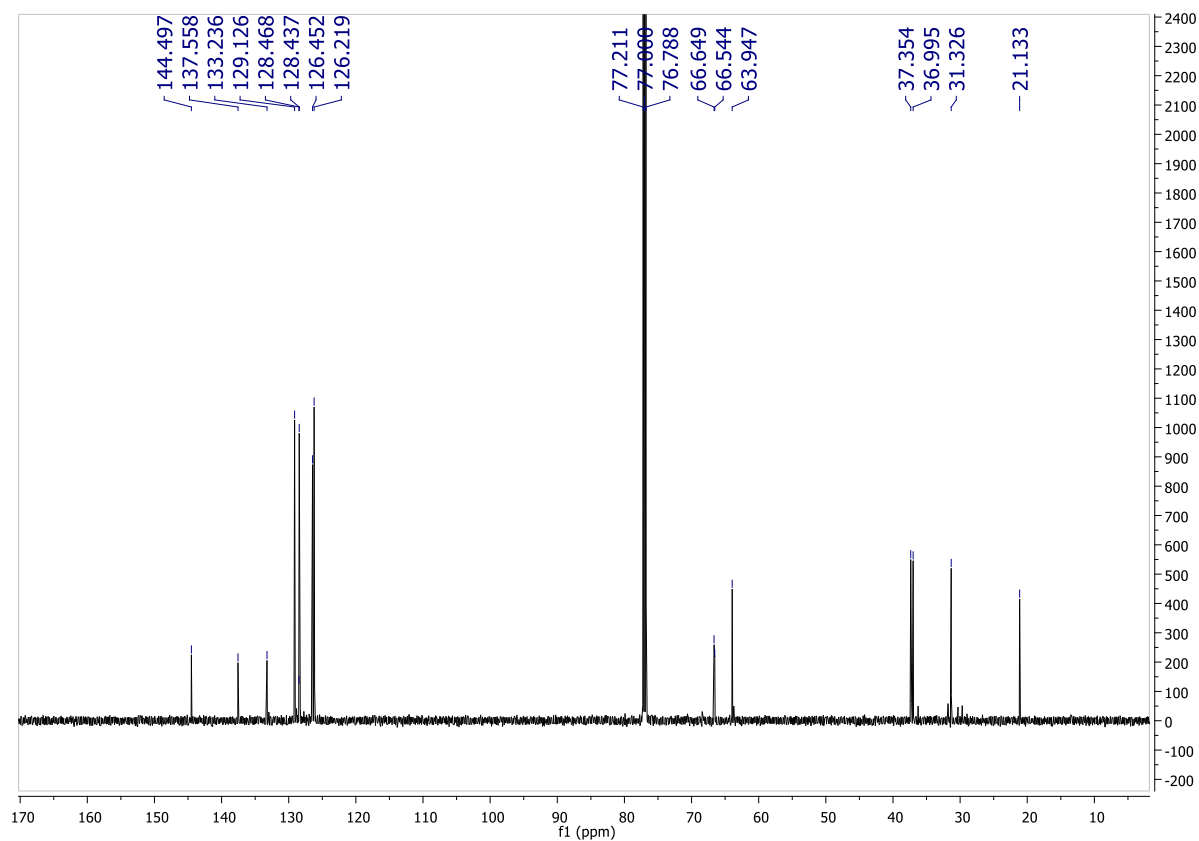

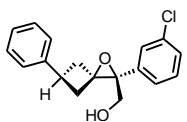

[(2S,3s,5R)-2-(3-Chloro-phenyl)-5-phenyl-1-oxa-spiro[2.3]hex-2-yl]-methanol (**4ad**)

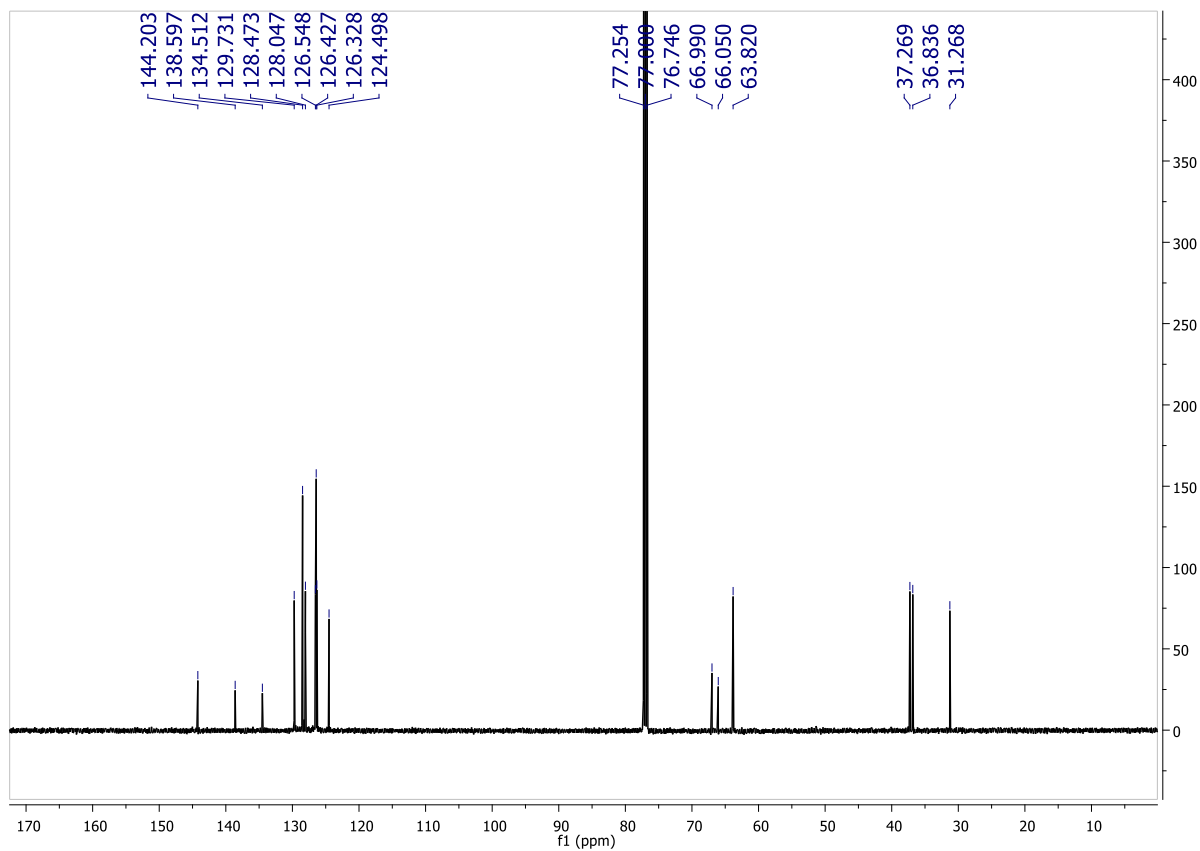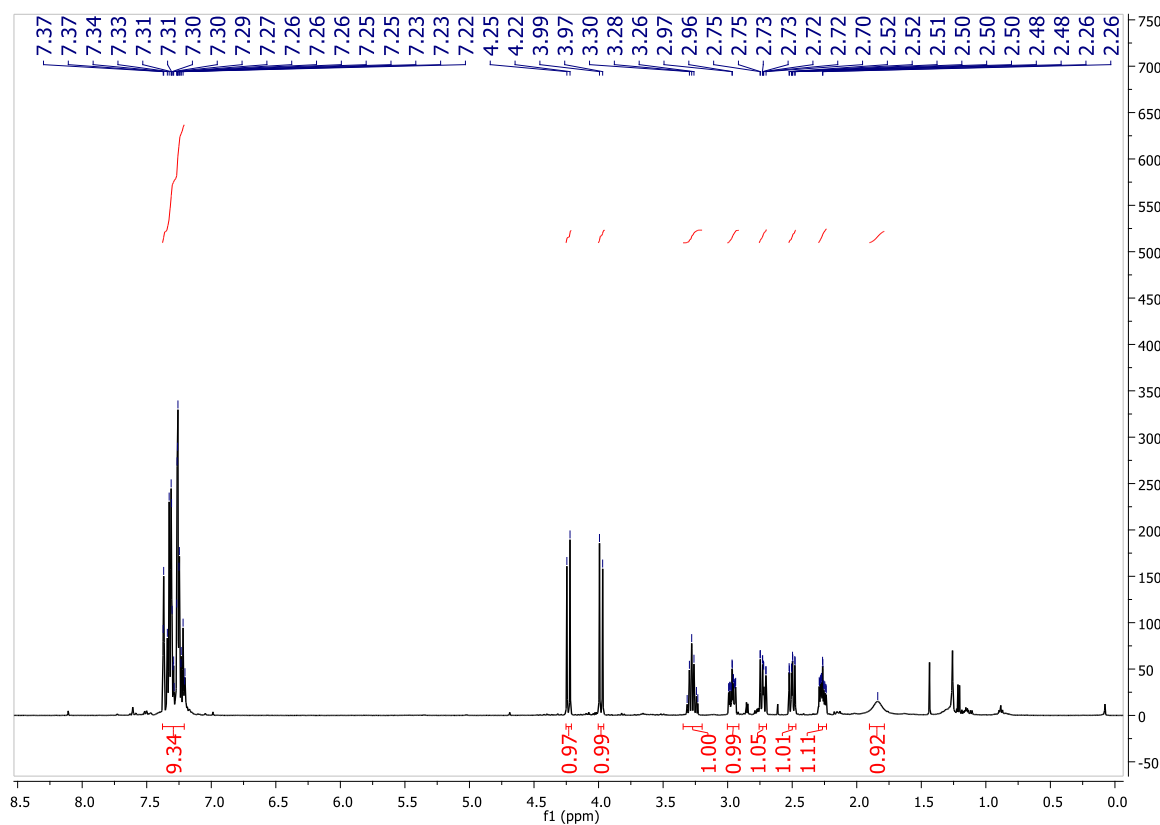

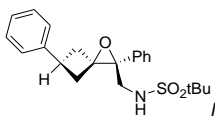

N-[[[(2S,3s,5R)-2,5-diphenyl-1-oxaspiro[2.3]hexan-2-yl)methyl]-2-methylpropane-2-sulfonamide (**7**)

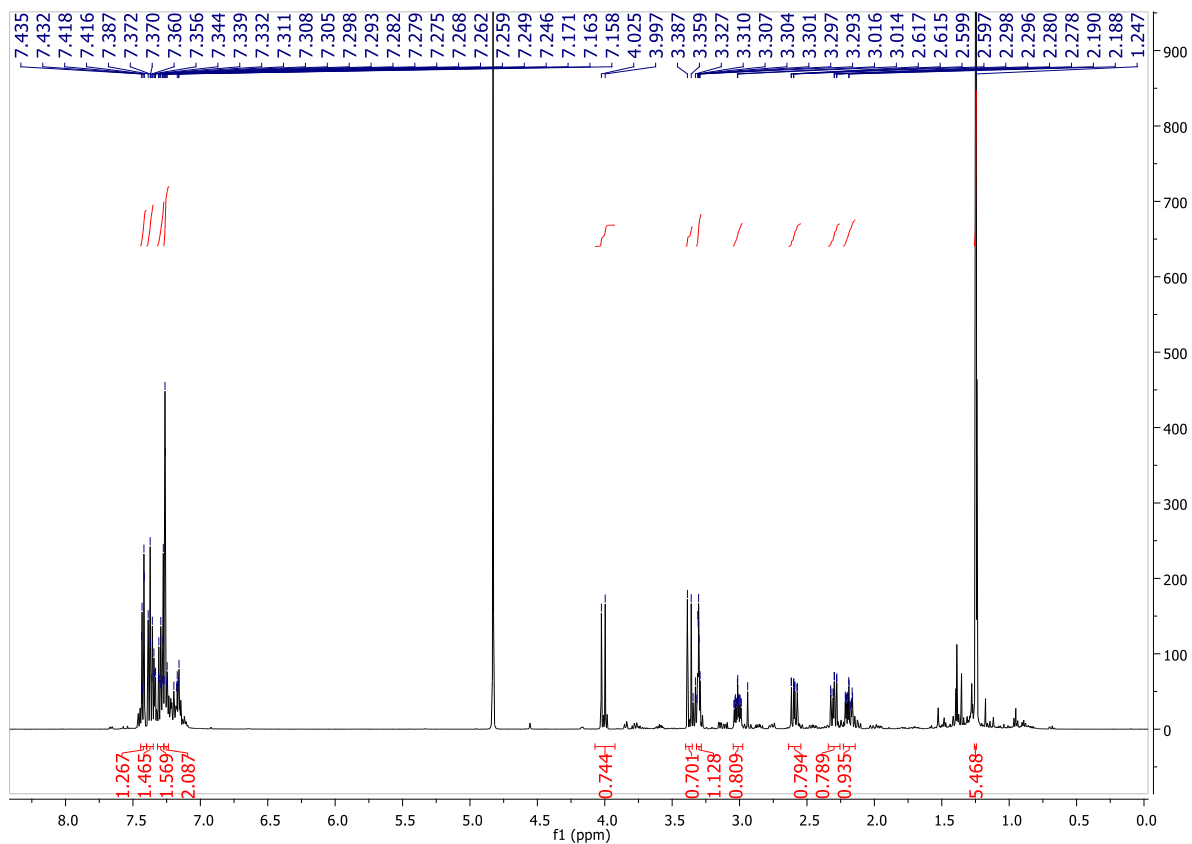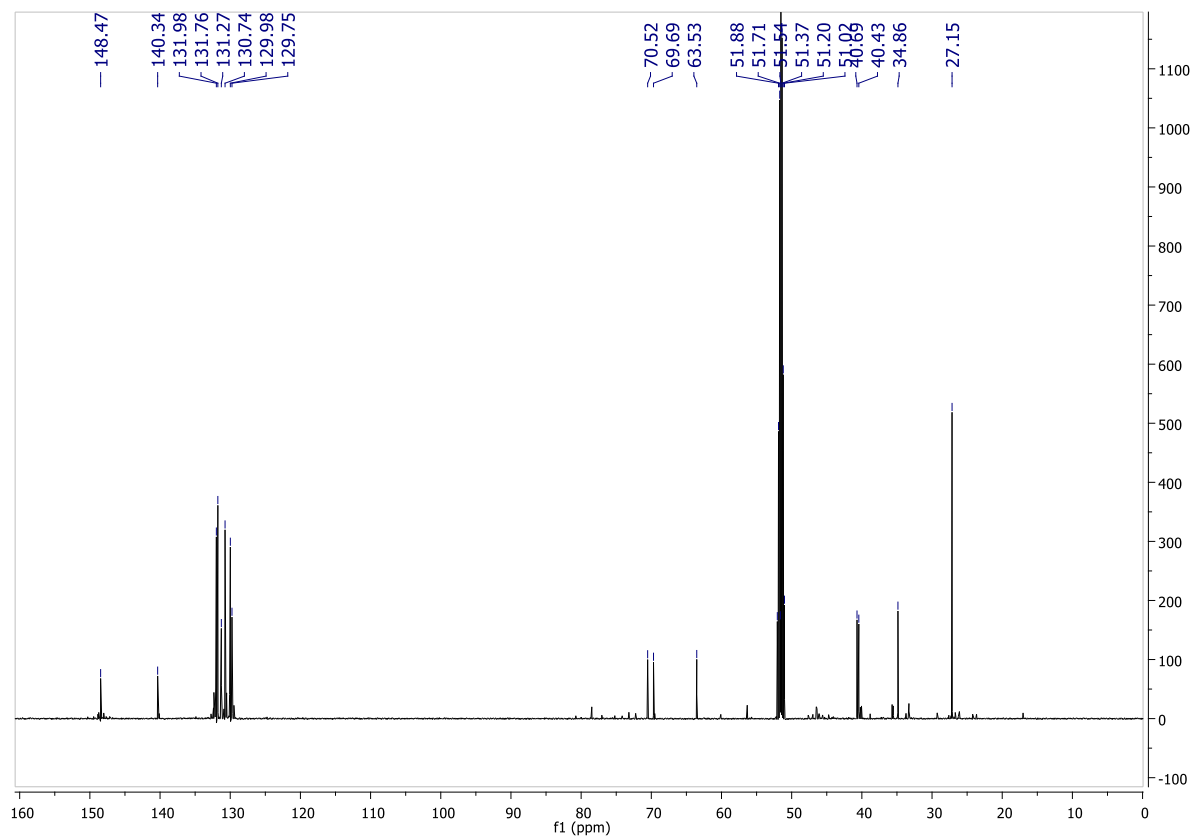

# 9. <sup>1</sup>H and <sup>13</sup>C NMR spectra of compounds 8 and 9

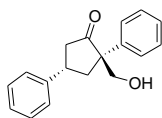

2-Hydroxymethyl-2,4-diphenyl-cyclopentanone (**8**)

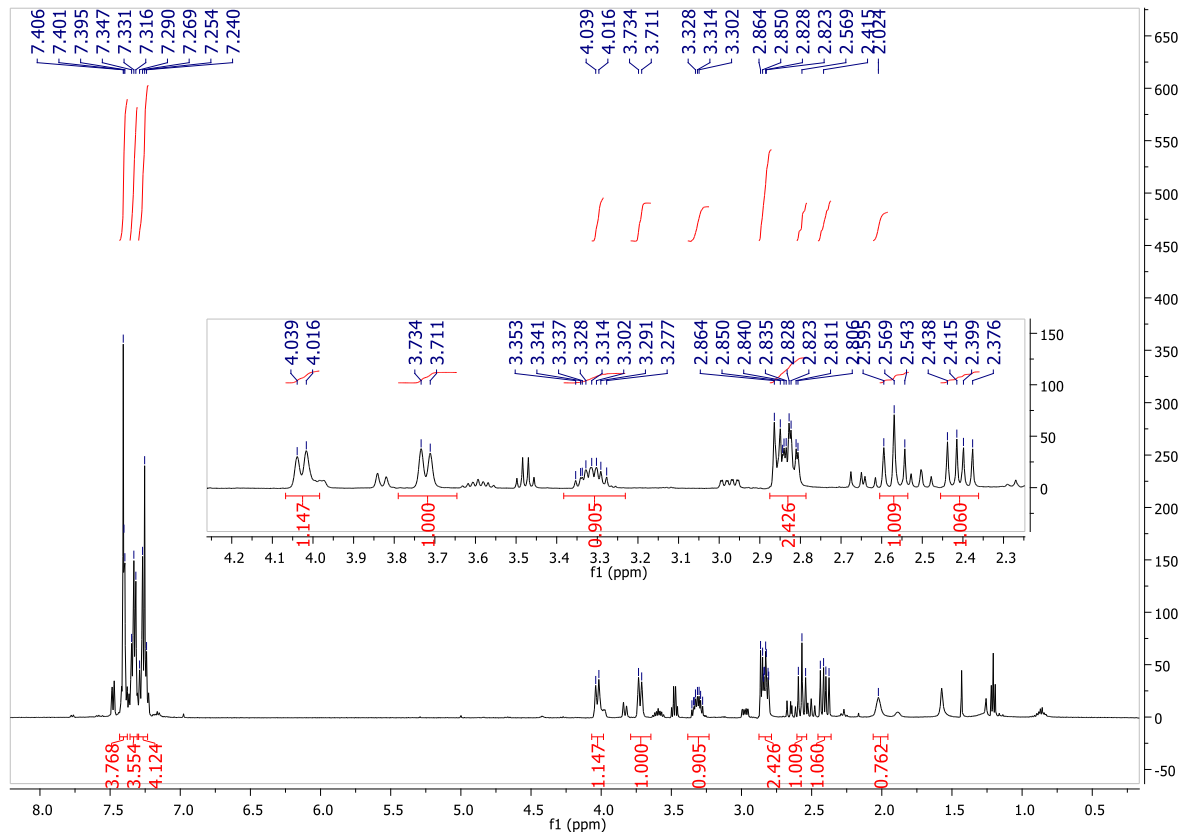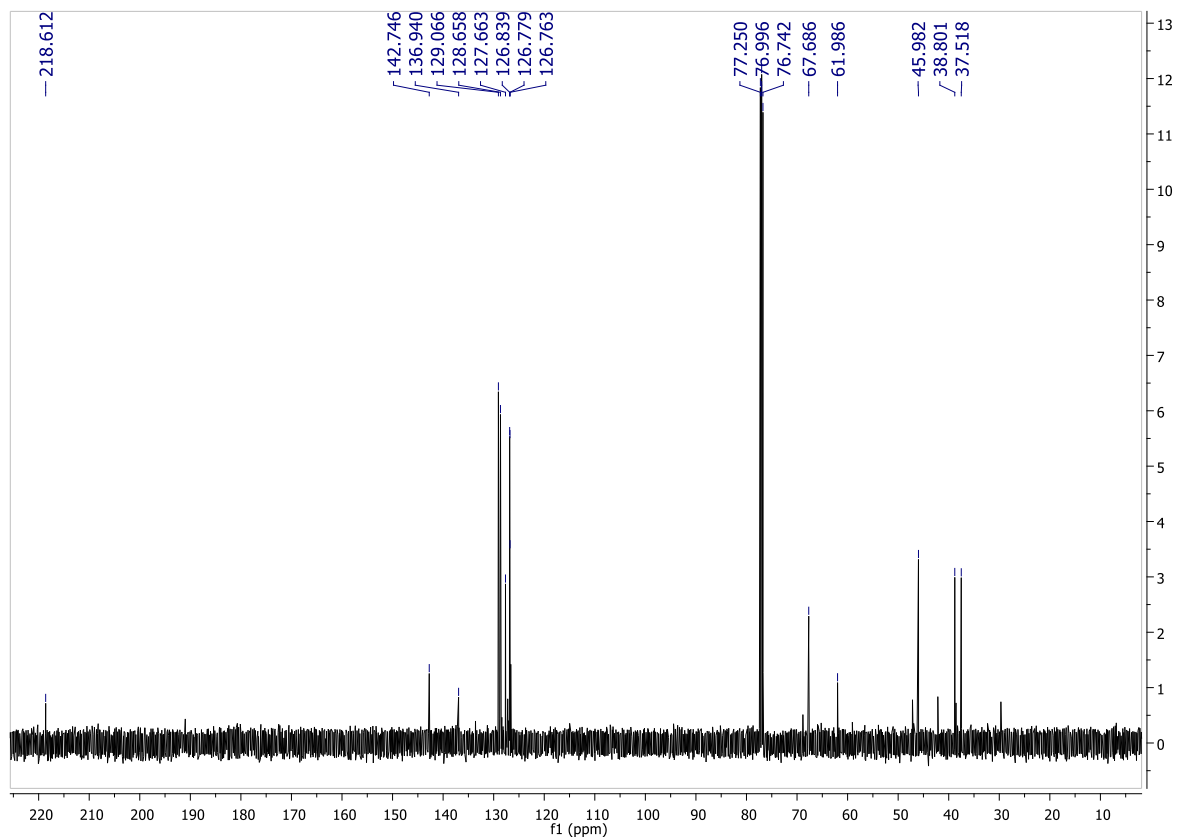



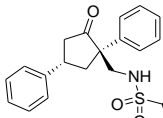

2-methyl-N-((2-oxo-1,4-diphenylcyclopentyl)methyl)propane-2-sulfonamide (**9**)

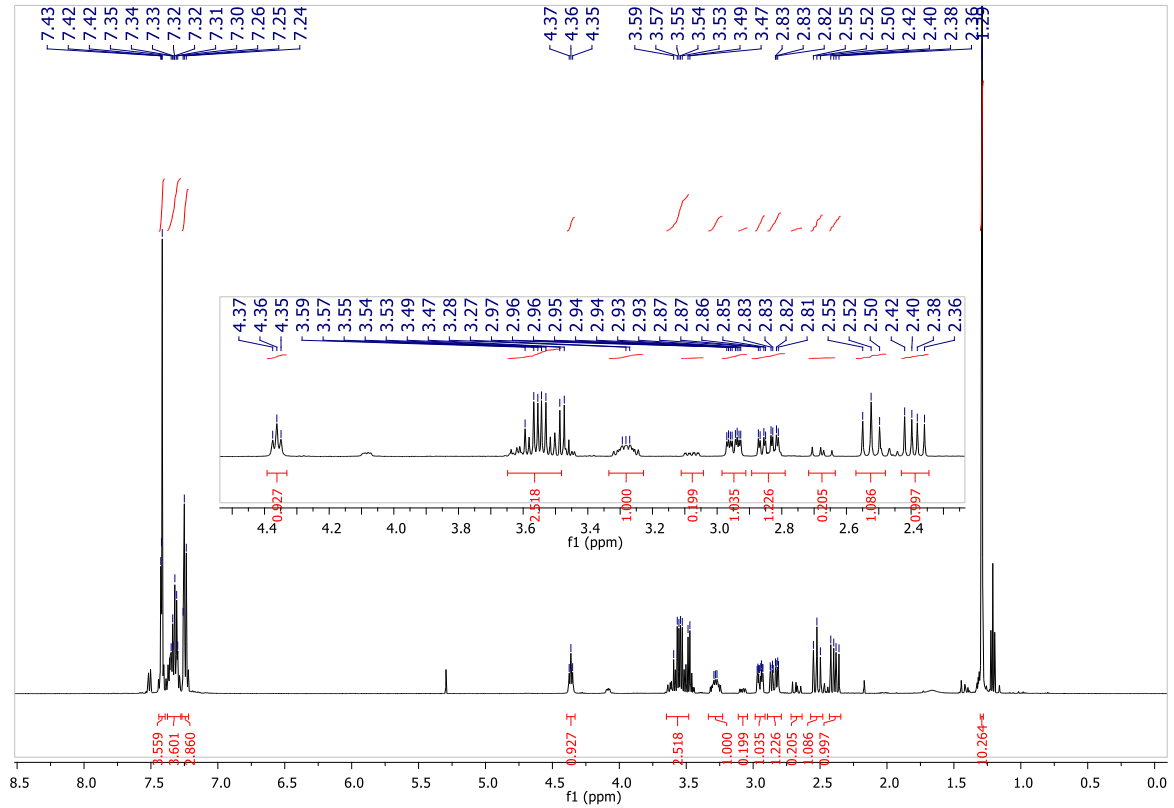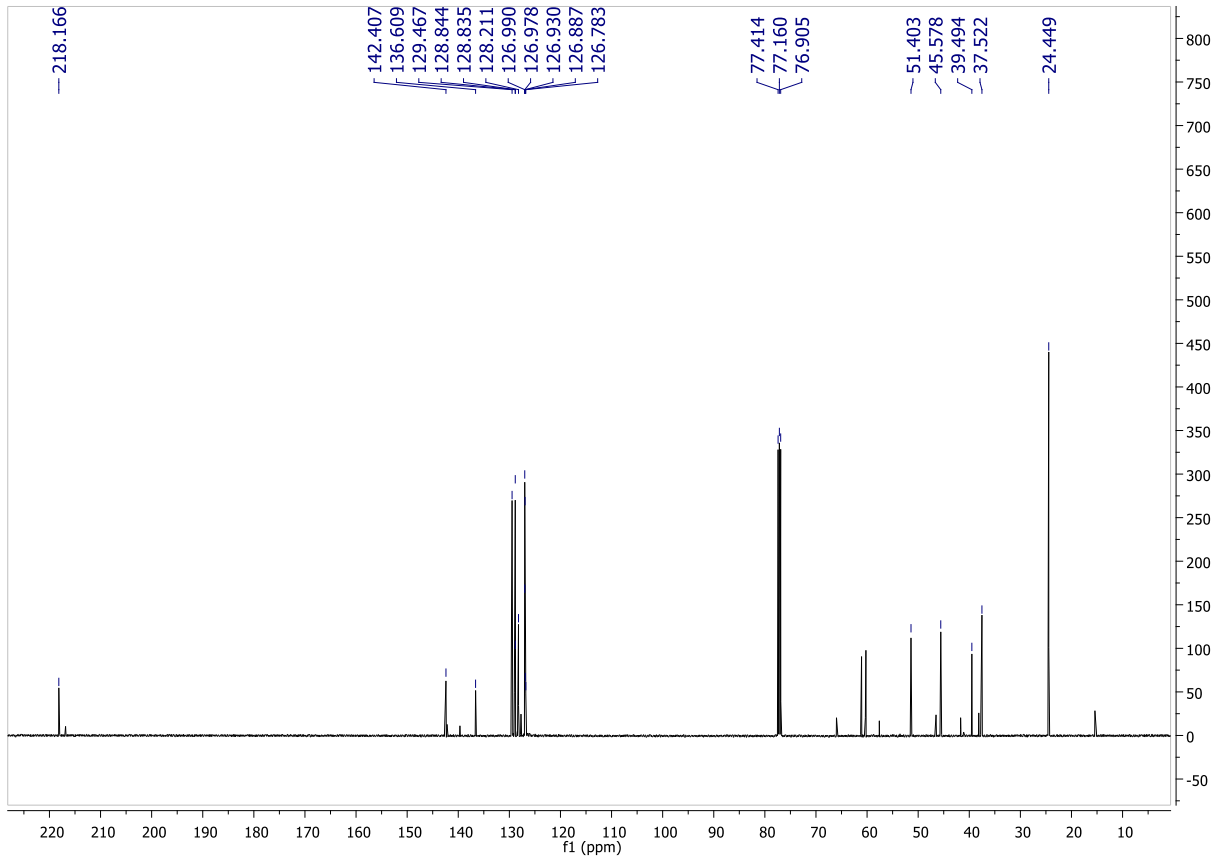

10. Representative D2-NMR experiments (COSY, NOESY, HSQC) of compounds 3a,3f,3h,4a,4f,4h,*cis*-6,7,9

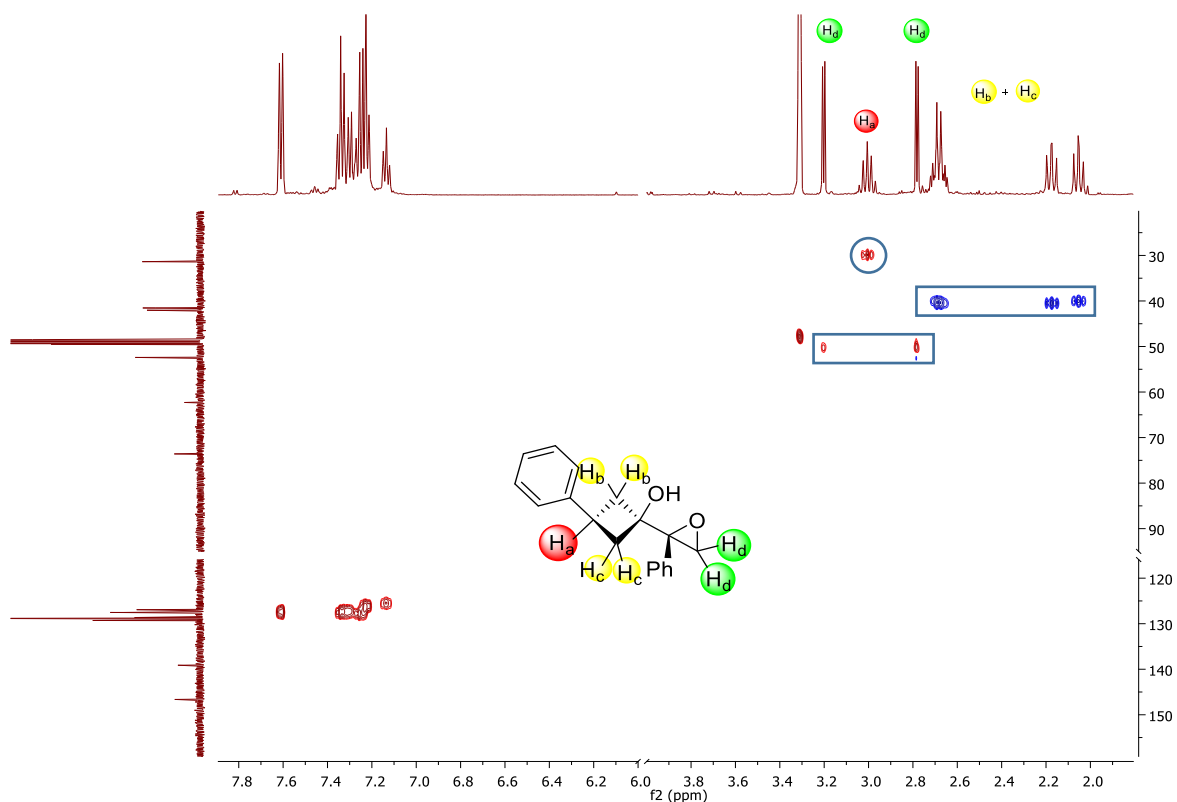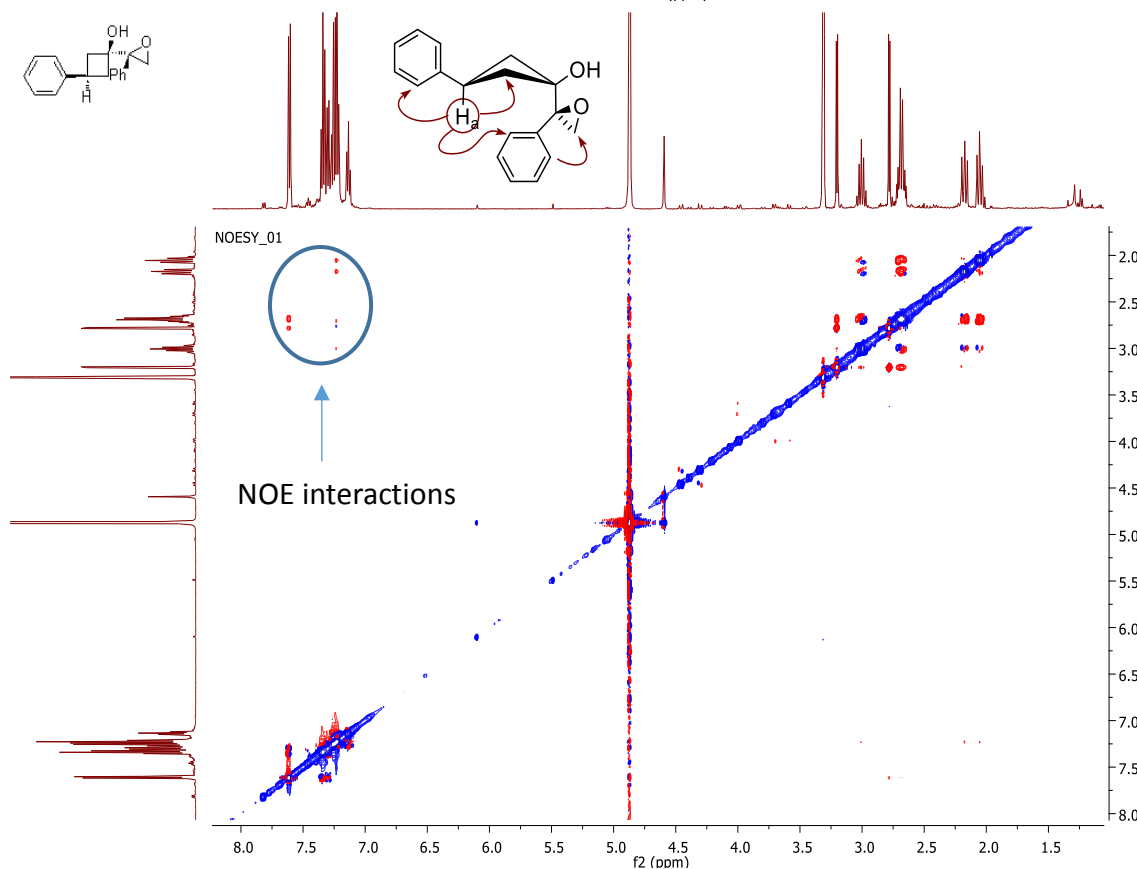

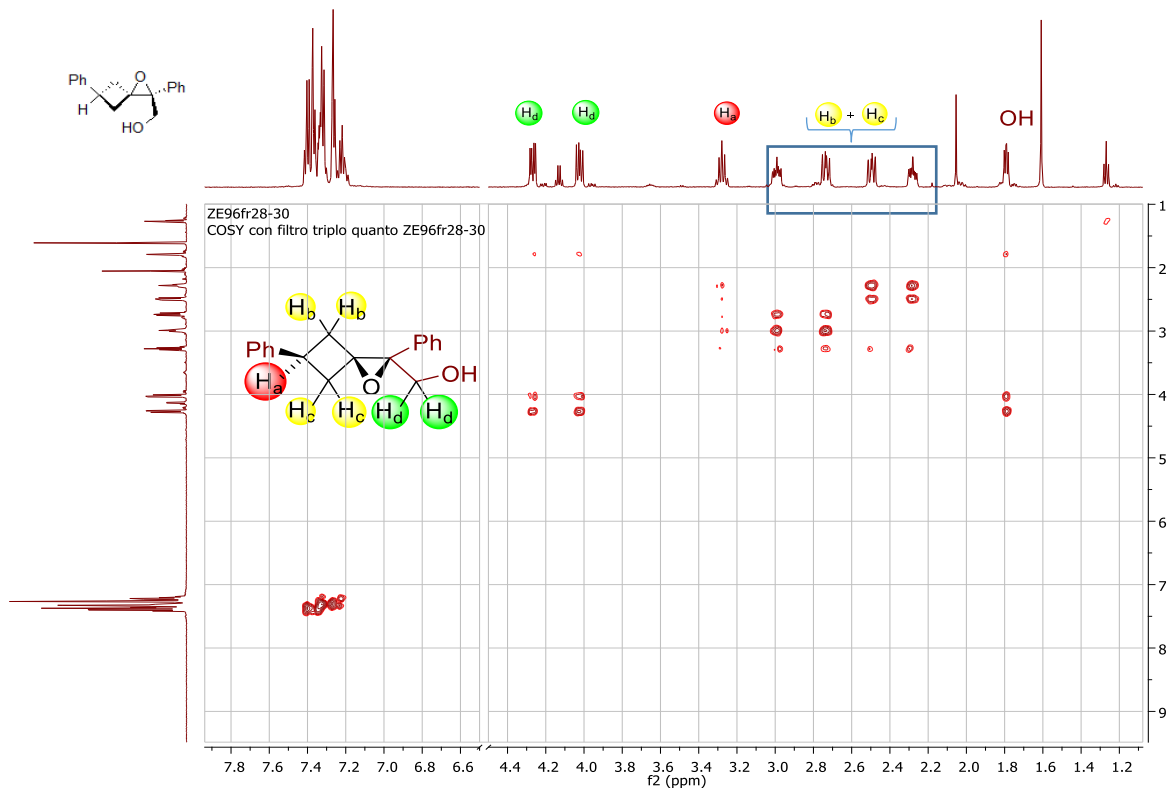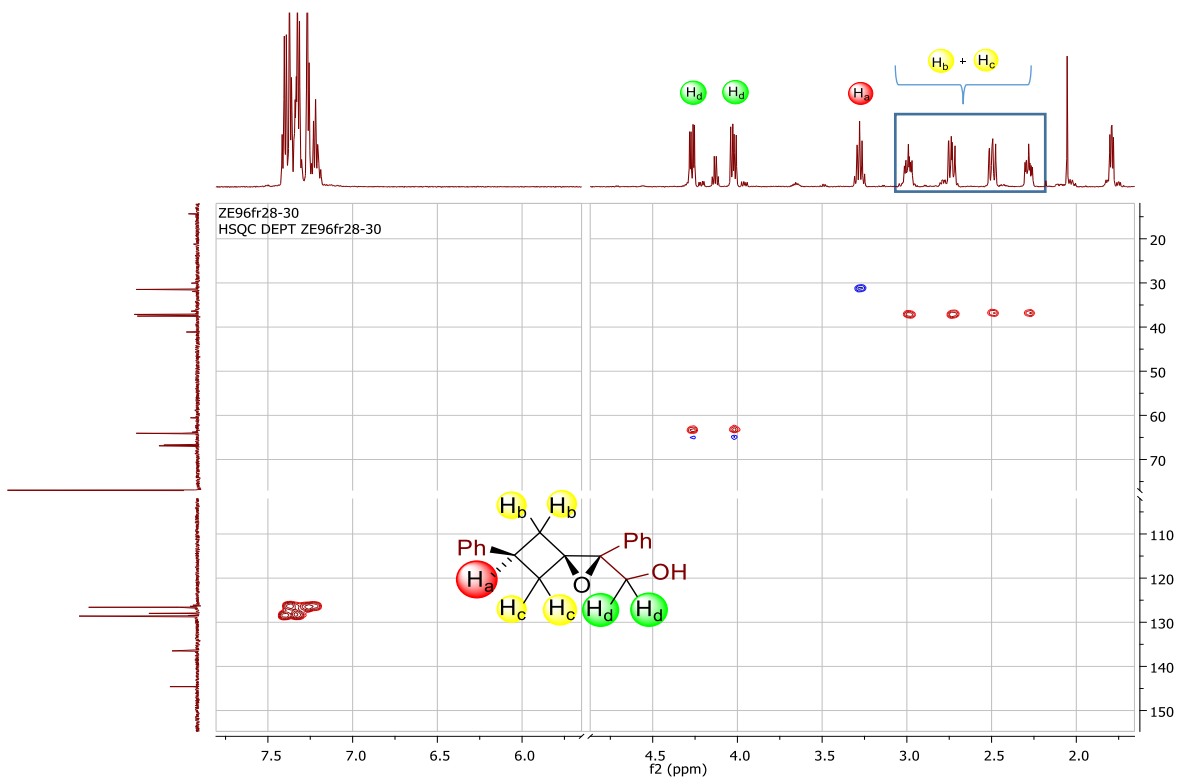

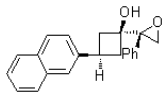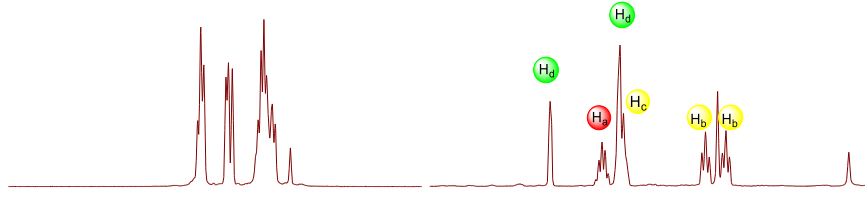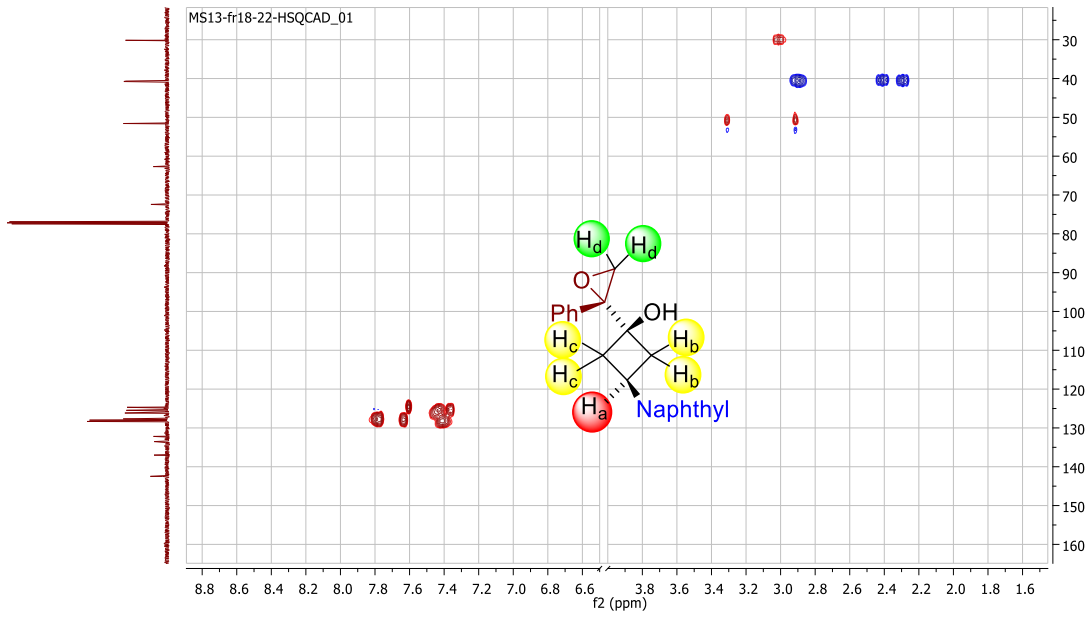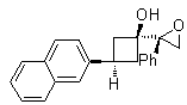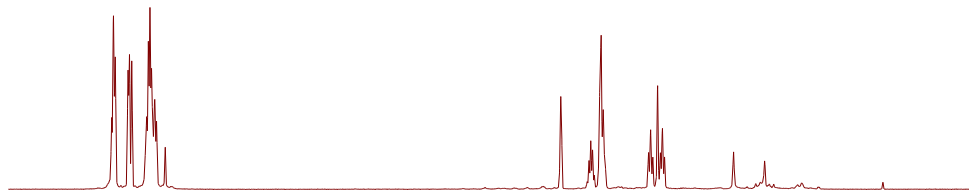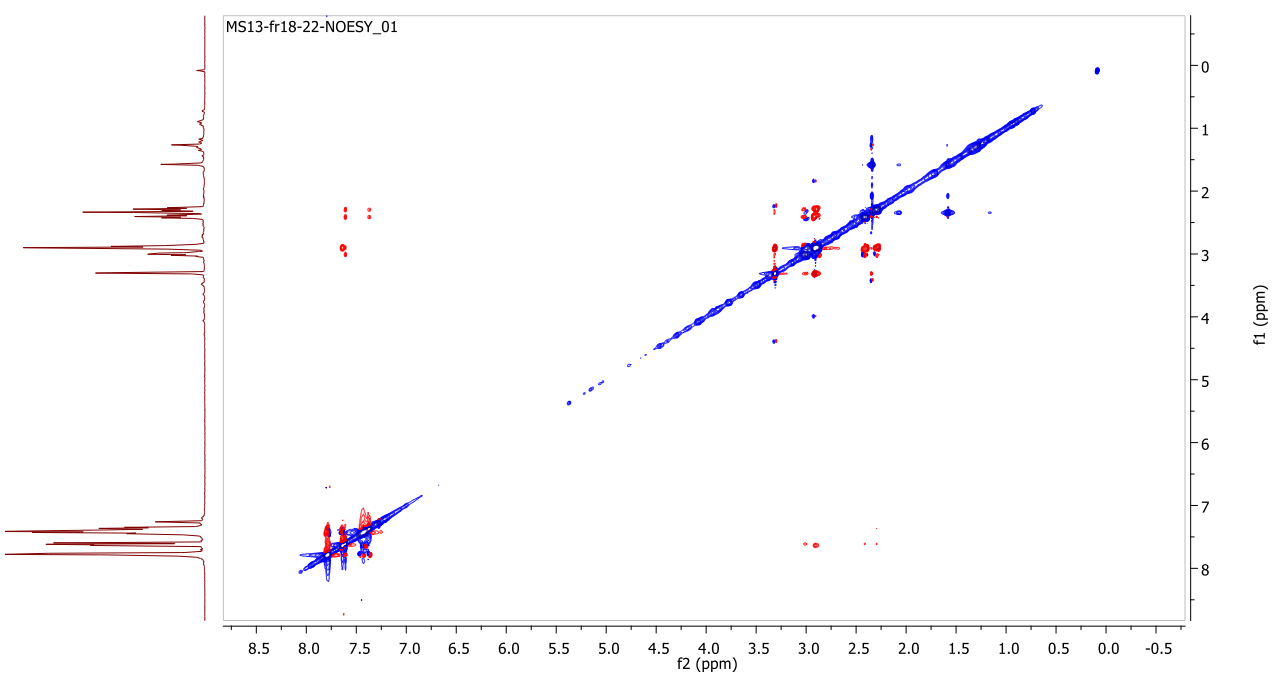

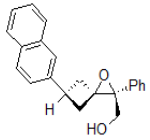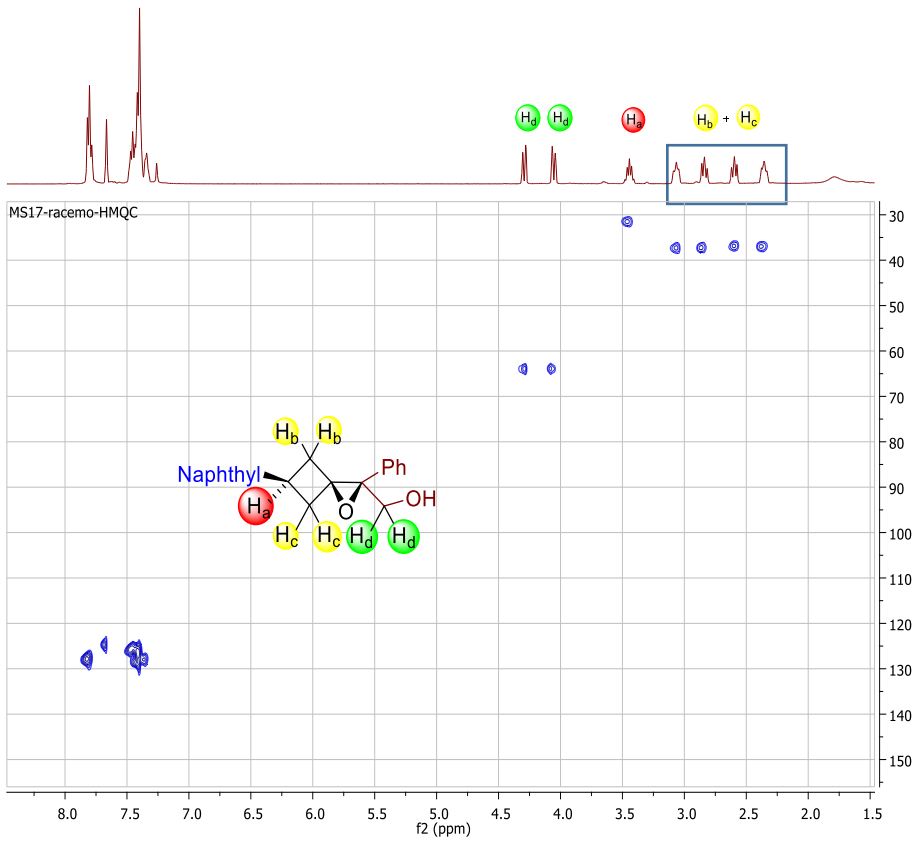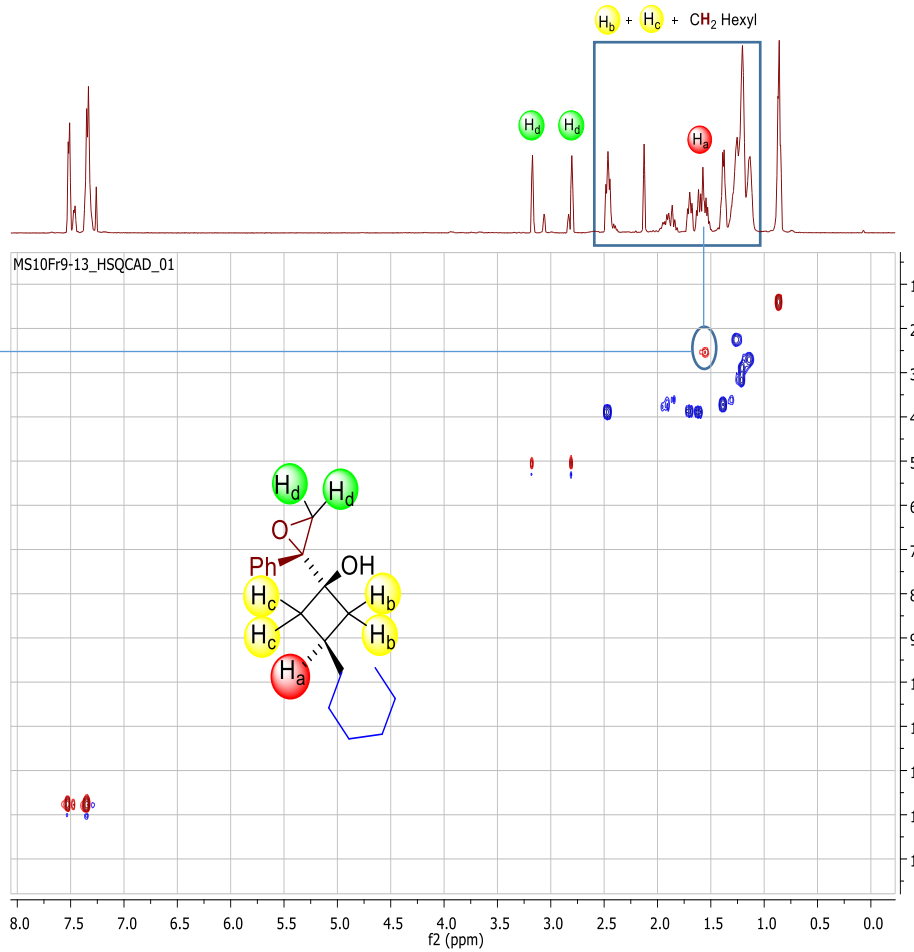

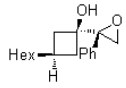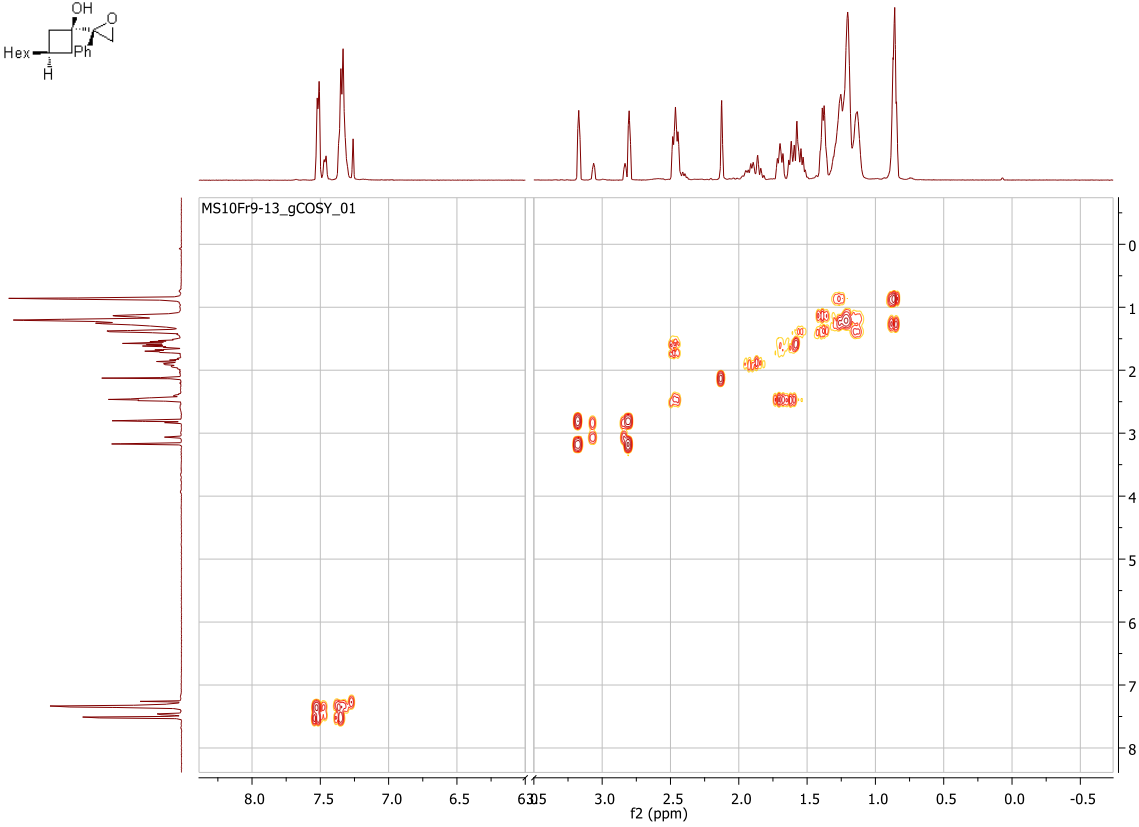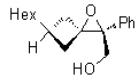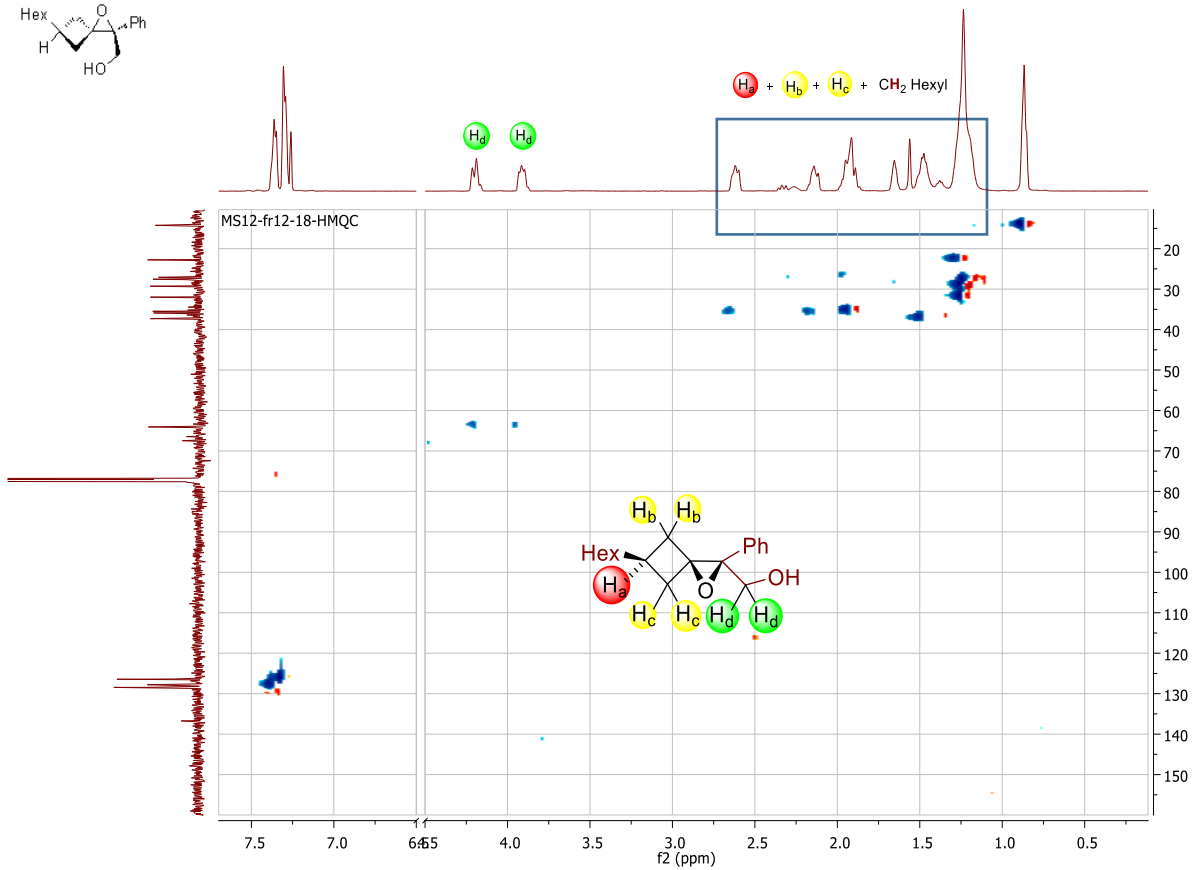

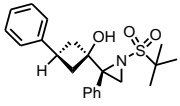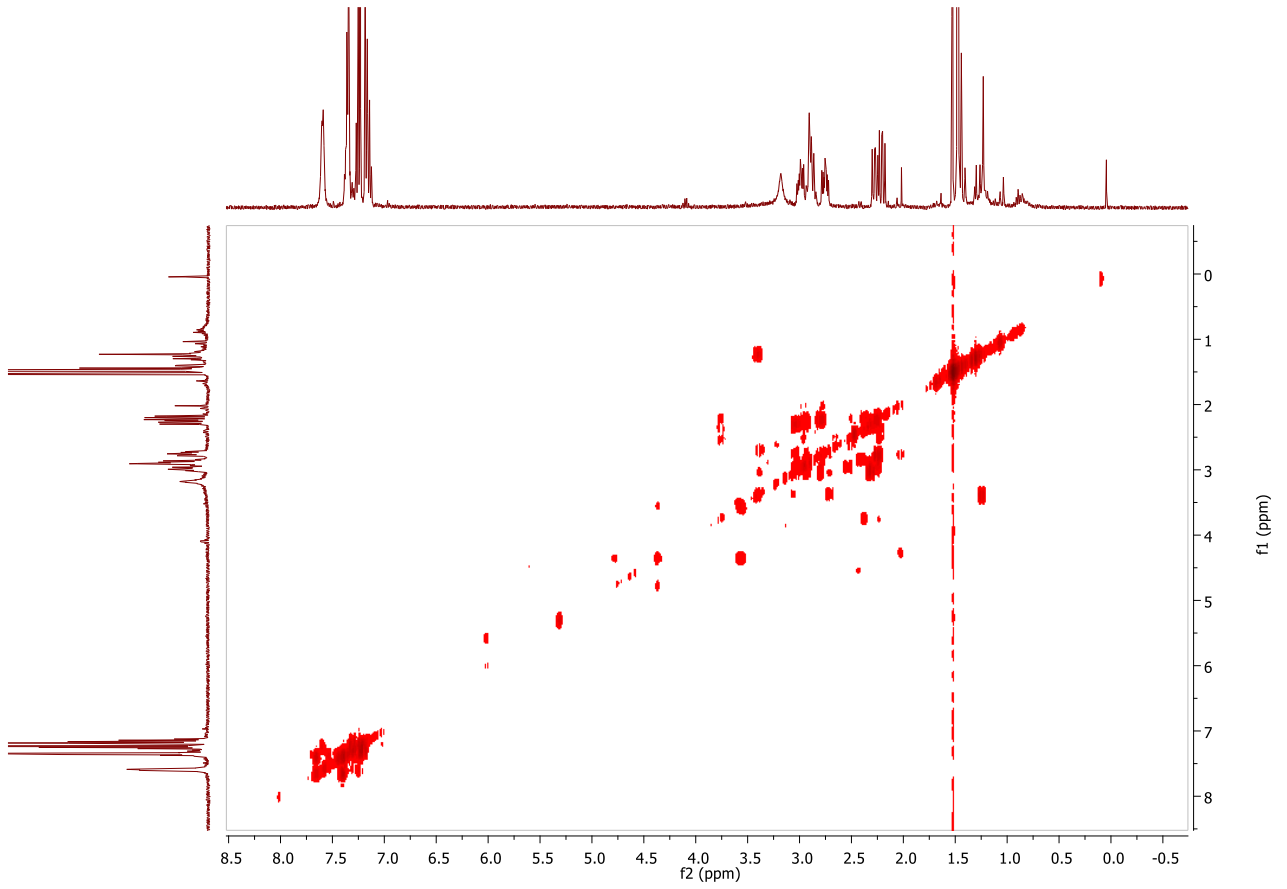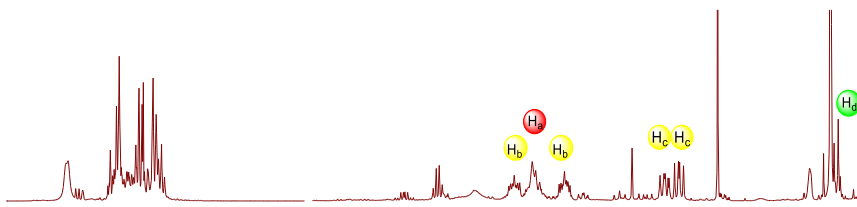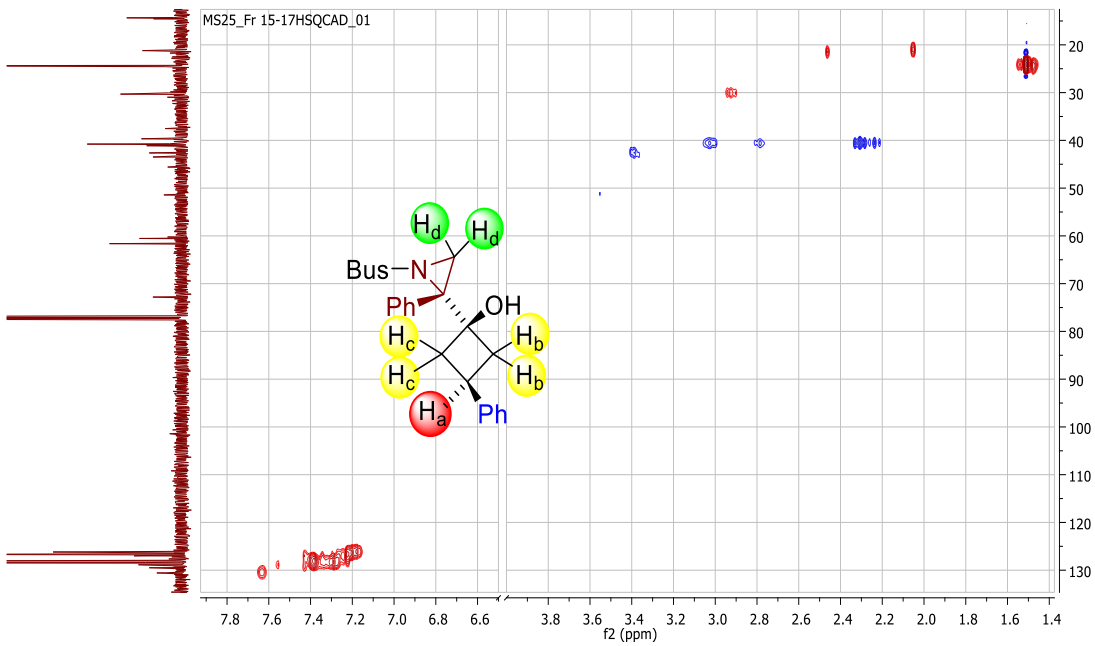

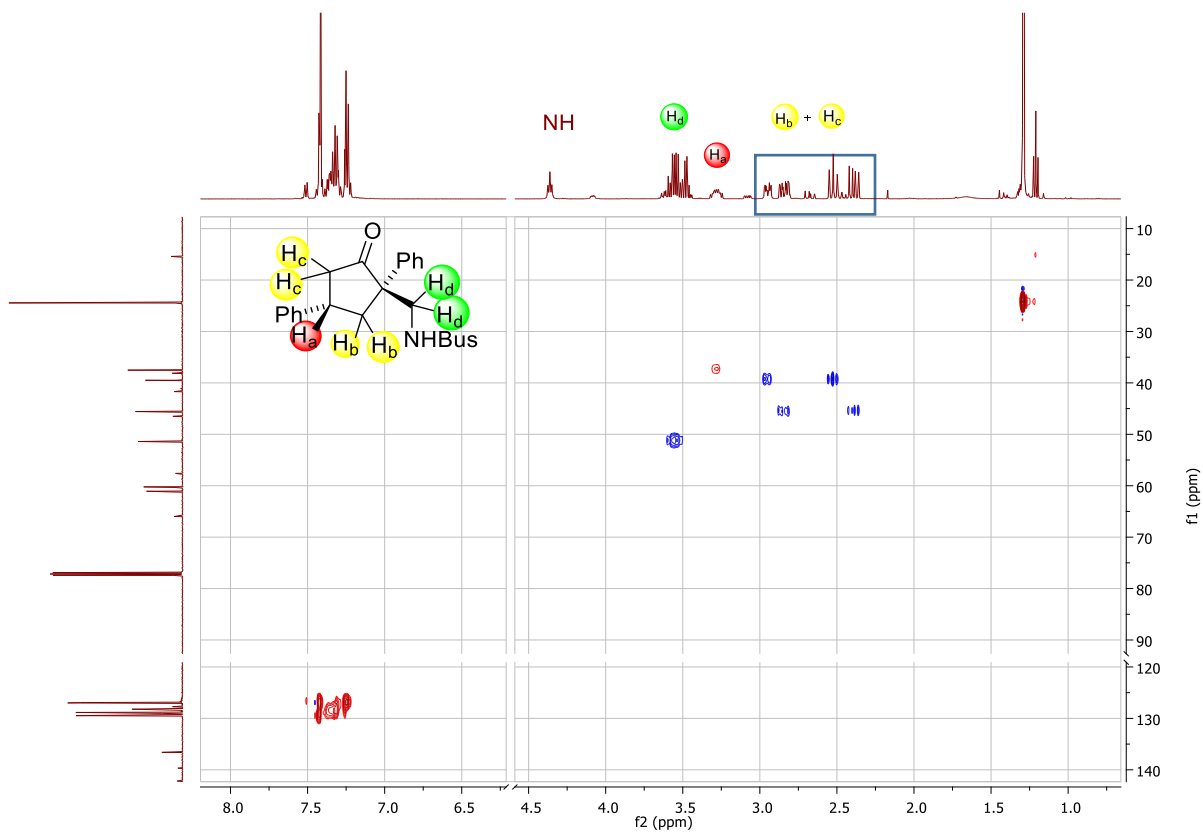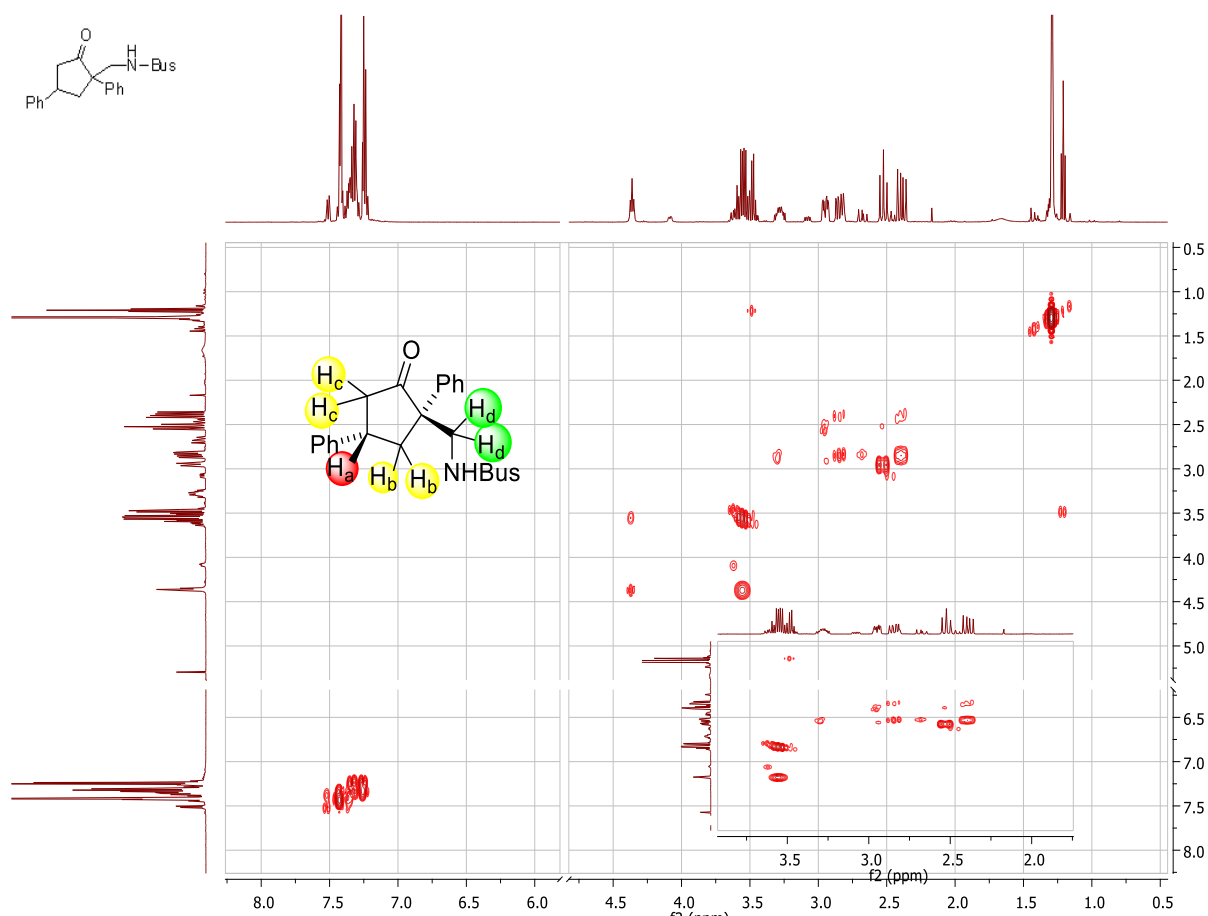



## 11. HPLC traces of compounds 3 and 4

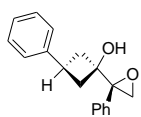

(1s,3S)-1-[(R)-(2-Phenylloxiran-2-yl)]-3-phenylcyclobutanol (**3a**)

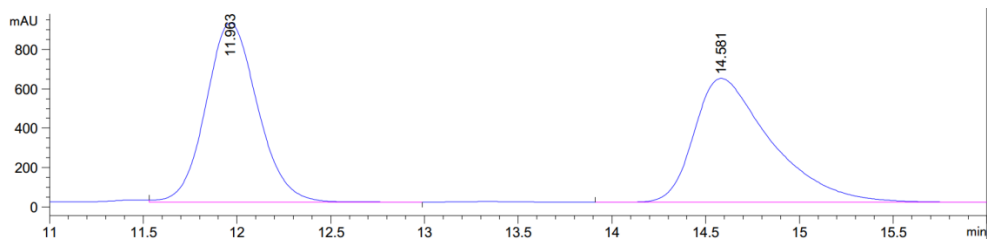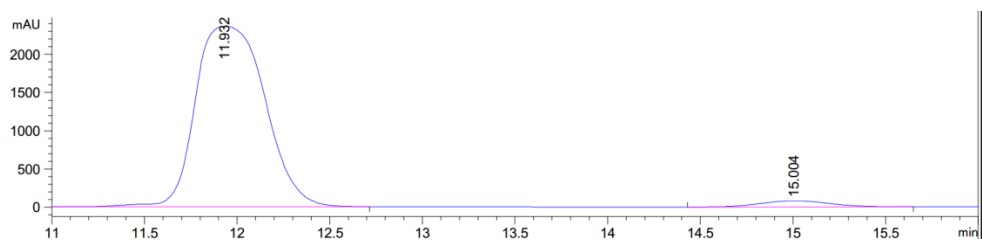

| Peak # | RetTime [min] | Type | Width [min] | Area [mAU*s] | Height [mAU] | Area %  |
|--------|---------------|------|-------------|--------------|--------------|---------|
| 1      | 11.932        | BB   | 0.4178      | 6.14731e4    | 2360.42358   | 96.6742 |
| 2      | 15.004        | BB   | 0.3993      | 2086.60693   | 81.33622     | 3.2815  |

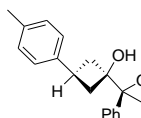

(1s,3S)-1-[(R)-(2-Phenylloxiran-2-yl)]-3-(p-tolyl)cyclobutanol (**3b**)

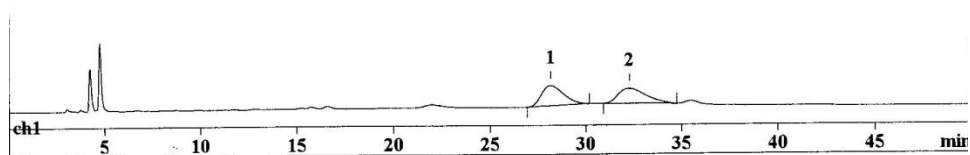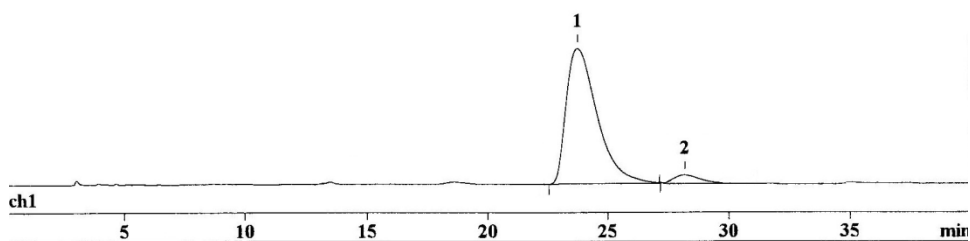

Quantitation method: Absolute concentration  
 Standard component: No  
 Normalization: 100.00

| No | Retention min | Area mV*sec | Area % | Name |
|----|---------------|-------------|--------|------|
| 1  | 24.15         | 6173.113    | 93.46  |      |
| 2  | 27.01         | 431.729     | 6.54   |      |
| 2  | 40.00         | 6604.842    | 100.00 |      |

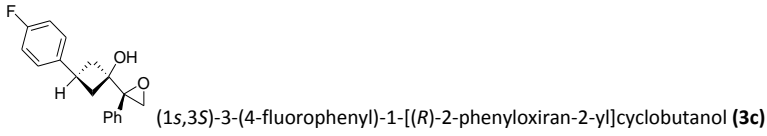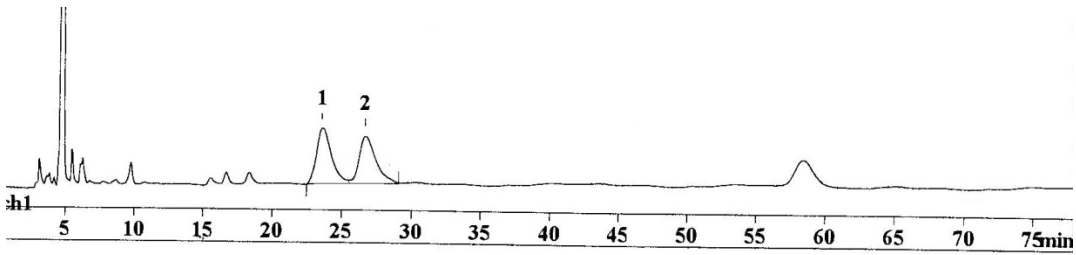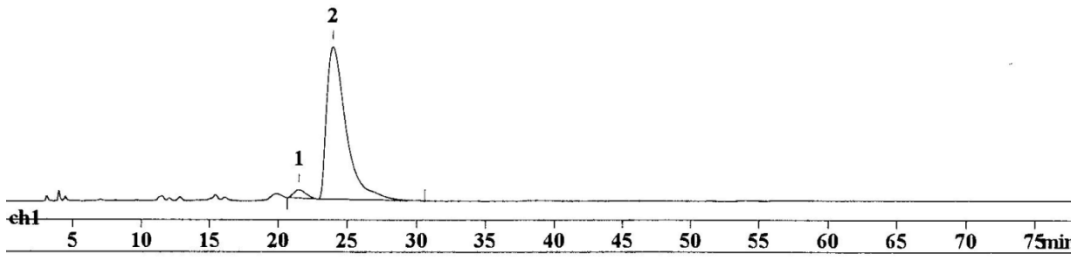

Quantitation method: Absolute concentration  
 Standard component: No  
 Normalization: 100.00

| No | Retention<br>min | Area<br>mV*sec | Area<br>% | Name |
|----|------------------|----------------|-----------|------|
| 1  | 21.51            | 519.985        | 3.51      |      |
| 2  | 23.97            | 14294.281      | 96.49     |      |
| 2  | 78.00            | 14814.266      | 100.00    |      |

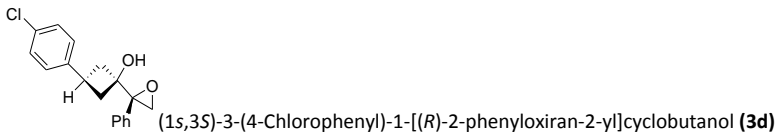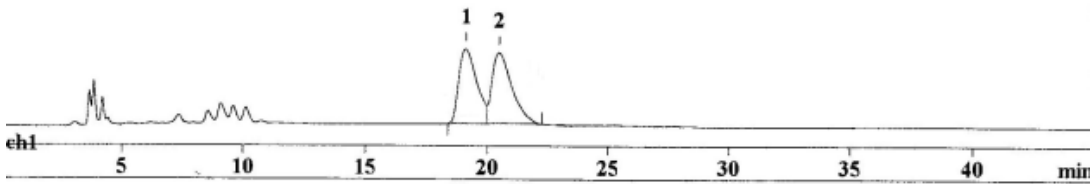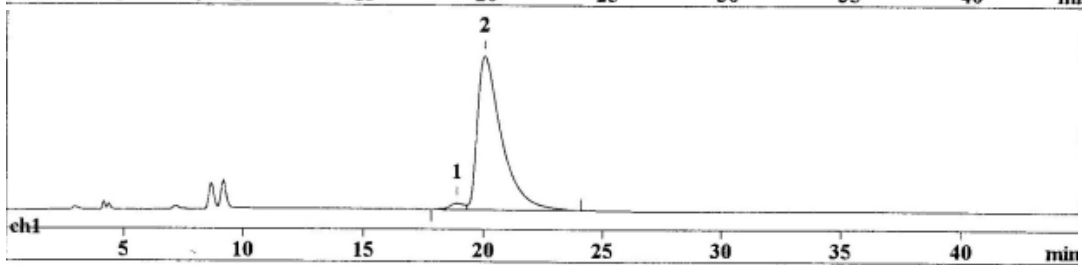

Quantitation method: Absolute concentration  
 Standard component: No  
 Normalization: 100.00

| No | Retention<br>min | Area<br>mV*sec | Area<br>% | Name |
|----|------------------|----------------|-----------|------|
| 1  | 18.89            | 155.131        | 2.69      |      |
| 2  | 20.02            | 5622.045       | 97.31     |      |
| 2  | 45.00            | 5777.175       | 100.00    |      |

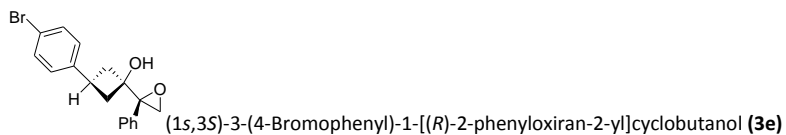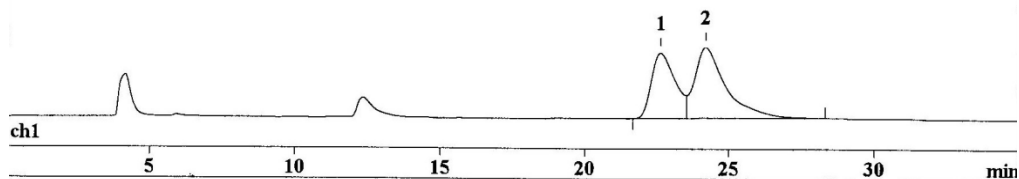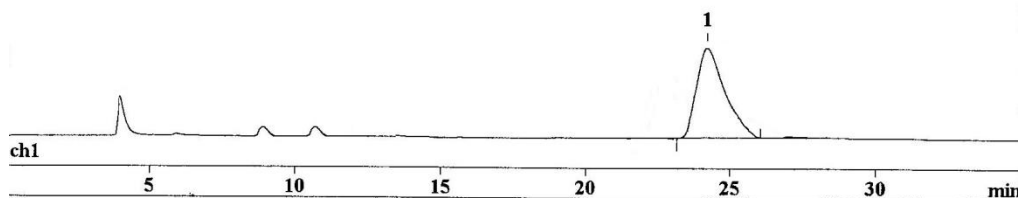

Quantitation method: Absolute concentration

| No | Retention<br>min | Area<br>mV*sec | Area<br>% | Name |
|----|------------------|----------------|-----------|------|
| 1  | 24.93            | 43857.011      | 100.00    |      |

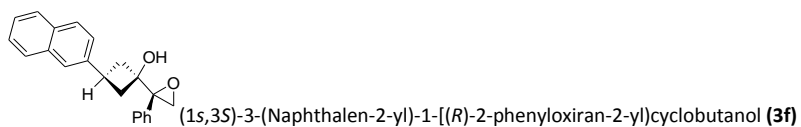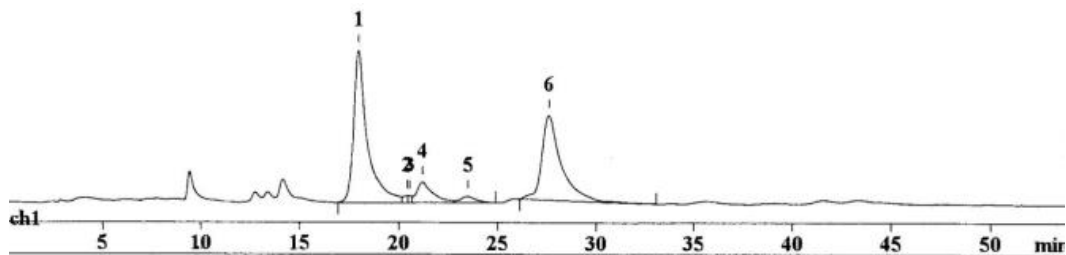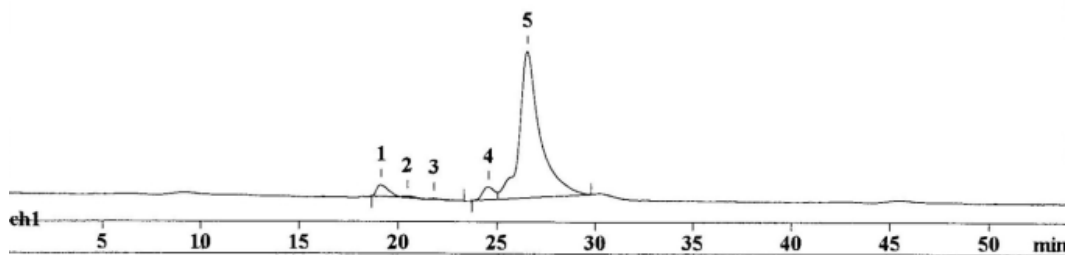

Quantitation method: Absolute concentration

Standard component: No  
Normalization: 100.00

| No | Retention<br>min | Area<br>mV*sec | Area<br>% | Name |
|----|------------------|----------------|-----------|------|
| 1  | 19.11            | 192.358        | 4.17      |      |
| 2  | 20.42            | 37.105         | 0.80      |      |
| 3  | 21.80            | 14.761         | 0.32      |      |
| 4  | 24.54            | 208.803        | 4.53      |      |
| 5  | 26.49            | 4157.913       | 90.17     |      |
| 5  | 54.00            | 4610.941       | 100.00    |      |

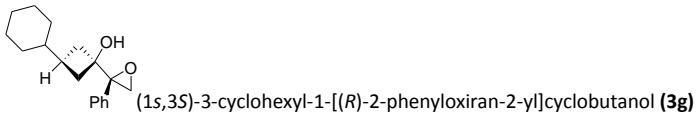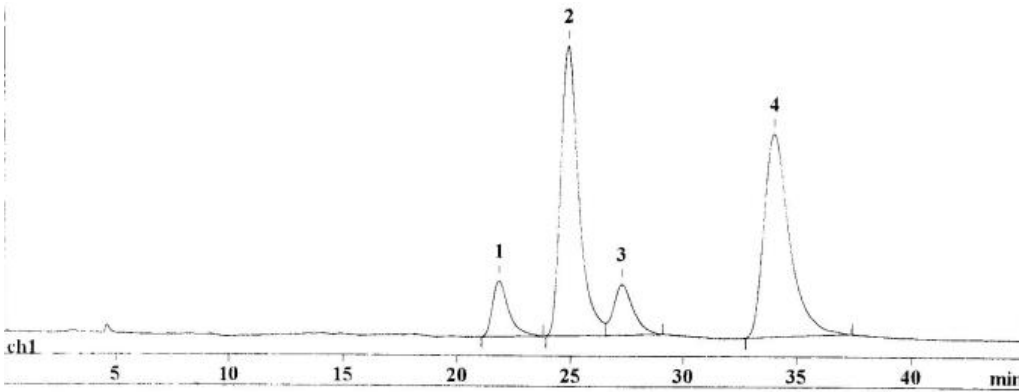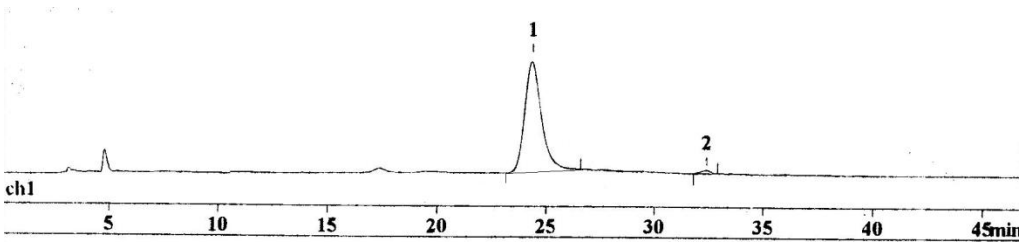

Quantitation method: Absolute concentration  
 Standard component: No  
 Normalization: 100.00

| No | Retention<br>min | Area<br>mV*sec | Area<br>% | Name |
|----|------------------|----------------|-----------|------|
| 1  | 24.09            | 11103.149      | 99.38     |      |
| 2  | 32.55            | 69.593         | 0.62      |      |
| 2  | 46.86            | 11172.742      | 100.00    |      |

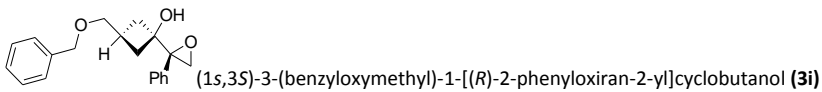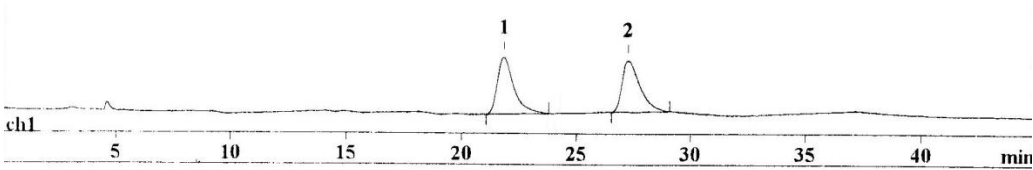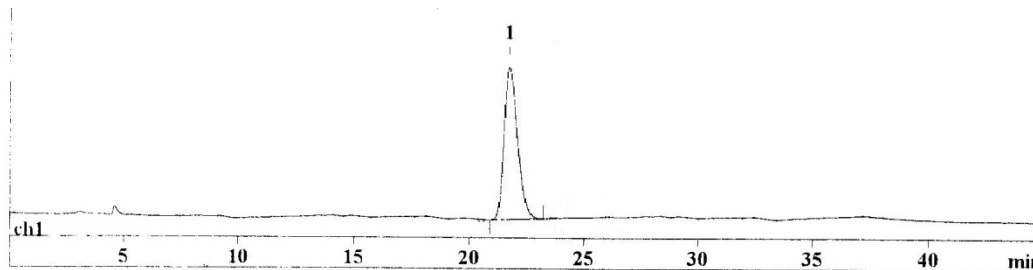

Quantitation method: Absolute concentration

| No | Retention<br>min | Area<br>mV*sec | Area<br>% | Name |
|----|------------------|----------------|-----------|------|
| 1  | 22.15            | 6395.389       | 100.00    |      |

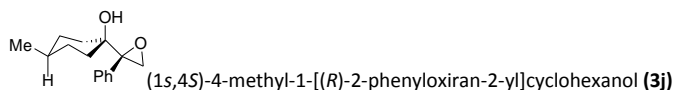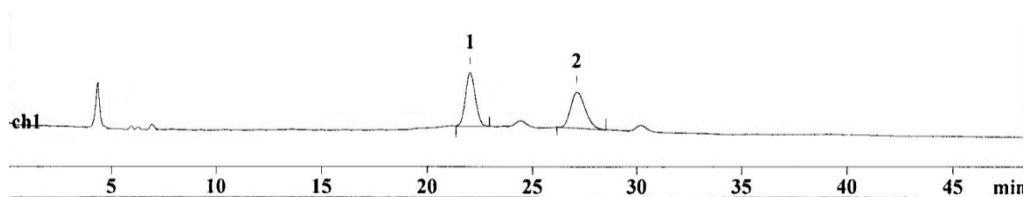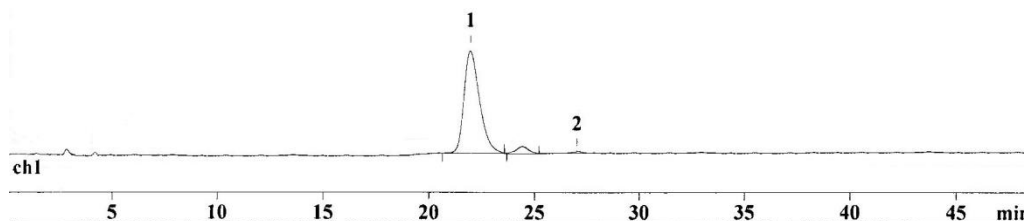

Quantitation method: Absolute concentration  
 Standard component: No  
 Normalization: 100.00

| No | Retention<br>min | Area<br>μV*sec | Area<br>% | Name |
|----|------------------|----------------|-----------|------|
| 1  | 22.02            | 1175.062       | 97.13     |      |
| 2  | 27.13            | 37.720         | 2.87      |      |
| 2  | 48.51            | 1209.782       | 100.00    |      |

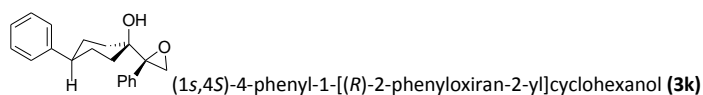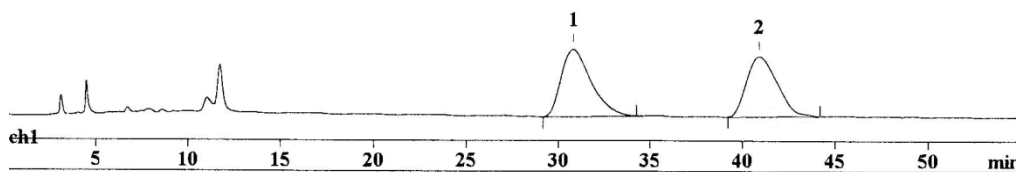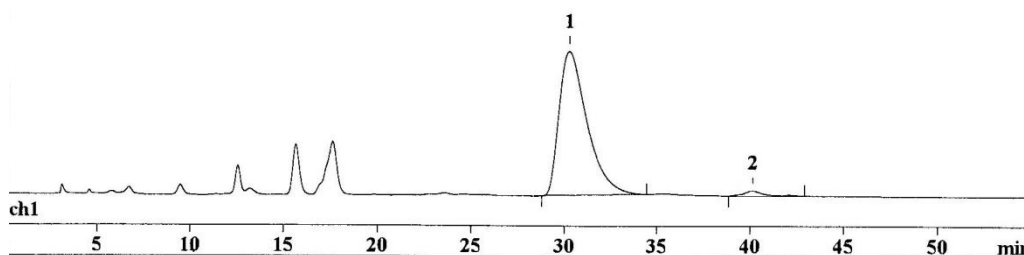

Quantitation method: Absolute concentration  
 Standard component: No  
 Normalization: 100.00

| No | Retention<br>min | Area<br>mV*sec | Area<br>% | Name |
|----|------------------|----------------|-----------|------|
| 1  | 30.23            | 10595.896      | 98.05     |      |
| 2  | 40.38            | 539.633        | 1.95      |      |
| 2  | 55.00            | 11135.529      | 100.00    |      |

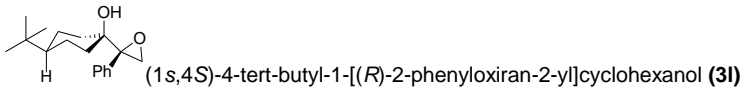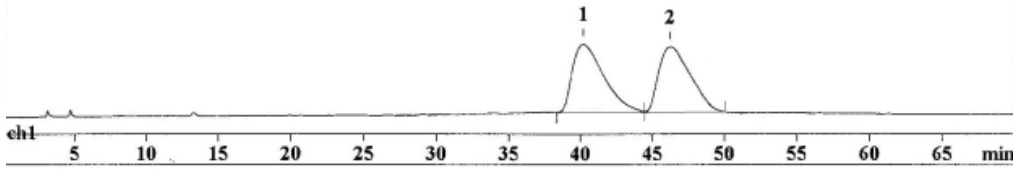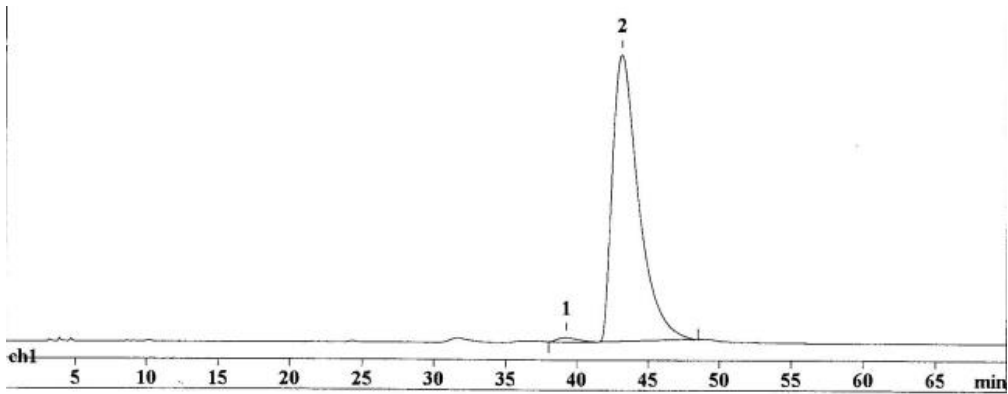

Quantitation method: Absolute concentration  
 Standard component: No  
 Normalization: 100.00

| No | Retention<br>min | Area<br>mV*sec | Area<br>% | Name |
|----|------------------|----------------|-----------|------|
| 1  | 39.23            | 710.719        | 1.20      |      |
| 2  | 43.07            | 58373.934      | 98.80     |      |
| 2  | 70.00            | 59084.653      | 100.00    |      |

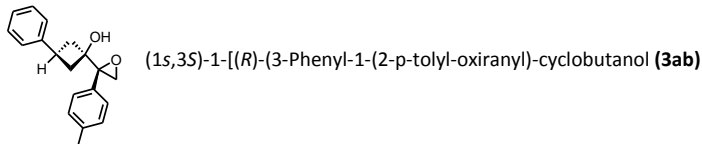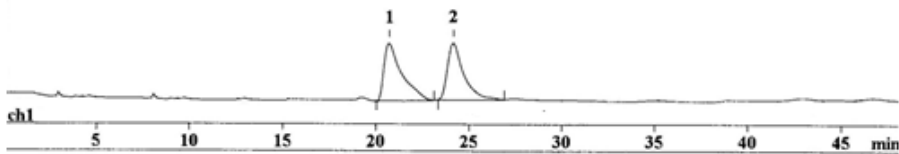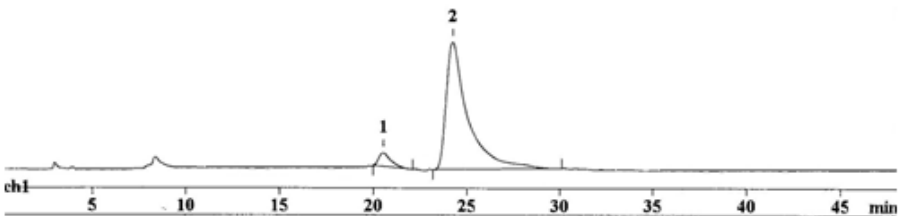

Quantitation method: Absolute concentration  
 Standard component: No  
 Normalization: 100.00

| No | Retention<br>min | Area<br>mV*sec | Area<br>% | Name |
|----|------------------|----------------|-----------|------|
| 1  | 20.45            | 165.894        | 5.94      |      |
| 2  | 23.02            | 2626.948       | 94.06     |      |
| 2  | 45.00            | 2792.842       | 100.00    |      |

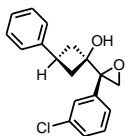

(1s,3S)-1-[(R)-(3-Chloro-phenyl)-oxiranyl]-3-phenyl-cyclobutanol (**3ad**)

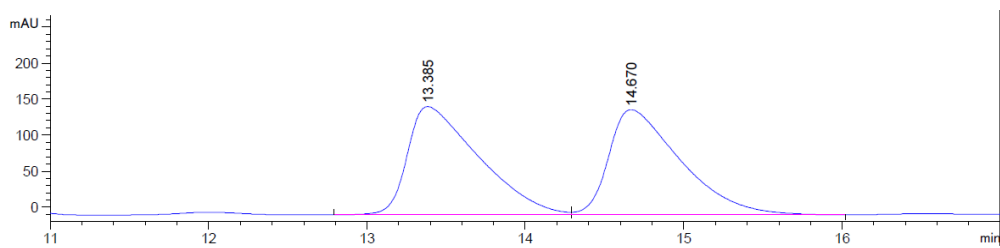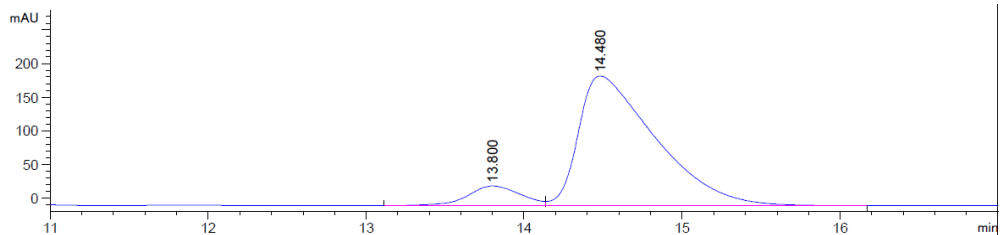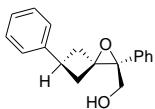

[(2S,3s,5R)-2,5-diphenyl-1-oxaspiro[2.3]hexan-2-yl]methanol (**4a**)

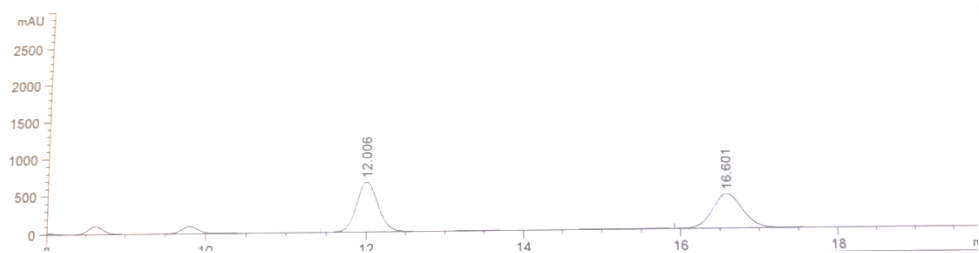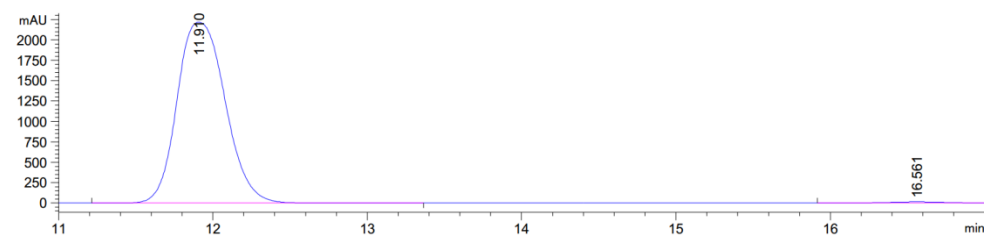

| Peak # | RetTime [min] | Type | Width [min] | Area [mAU*s] | Height [mAU] | Area %  |
|--------|---------------|------|-------------|--------------|--------------|---------|
| 1      | 11.910        | BB   | 0.3421      | 4.79466e4    | 2219.06689   | 99.2376 |
| 2      | 16.561        | BB   | 0.3944      | 368.37634    | 14.30523     | 0.7624  |

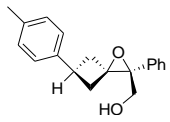

[(2S,3s,5R)-2-Phenyl-5-(p-tolyl)-1-oxaspiro[2.3]hexan-2-yl]methanol (**4b**)

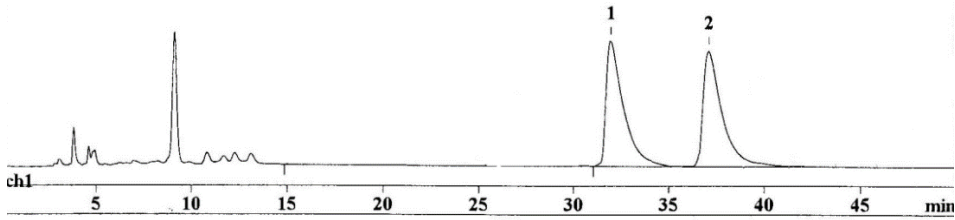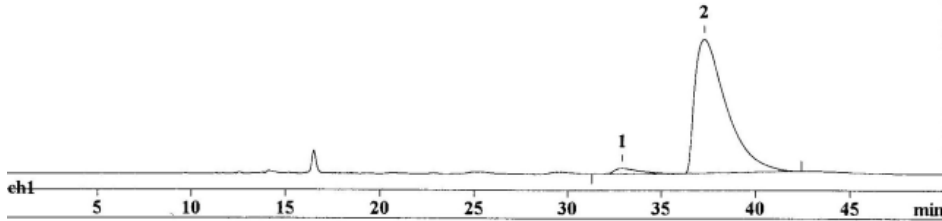

Quantitation method: Absolute concentration  
 Standard component: No  
 Normalization: 100.00

| No | Retention<br>min | Area<br>mV*sec | Area<br>% | Name |
|----|------------------|----------------|-----------|------|
| 1  | 32.88            | 1513.702       | 3.20      |      |
| 2  | 37.25            | 45764.280      | 96.80     |      |
| 2  | 50.00            | 47277.982      | 100.00    |      |

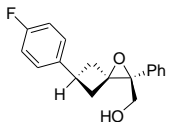

(2S,3s,5R)-[5-(4-Fluorophenyl)-2-phenyl-1-oxaspiro[2.3]hexan-2-yl]methanol (**4c**)

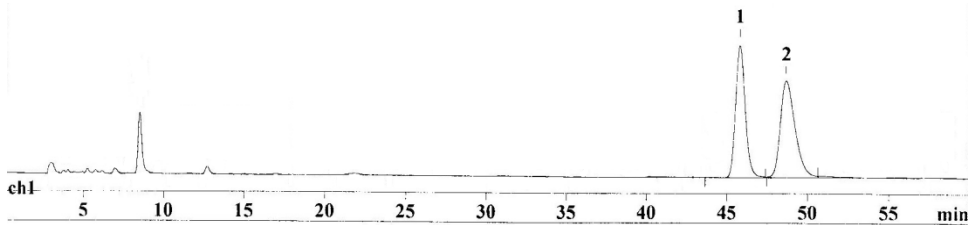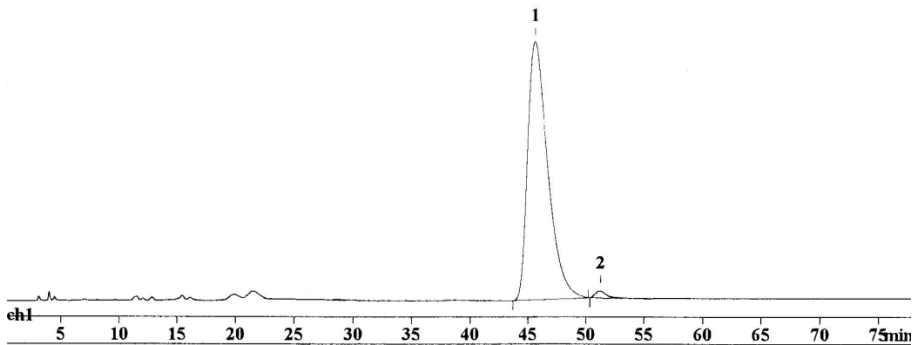

Quantitation method: Absolute concentration  
 Standard component: No  
 Normalization: 100.00

| No | Retention<br>min | Area<br>mV*sec | Area<br>% | Name |
|----|------------------|----------------|-----------|------|
| 1  | 46.97            | 270.912        | 1.86      |      |
| 2  | 51.21            | 14294.281      | 98.14     |      |
| 2  | 78.00            | 14565.193      | 100.00    |      |



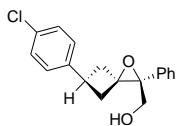

(2S,3s,5R)-[5-(4-Chlorophenyl)-2-phenyl-1-oxaspiro[2.3]hexan-2-yl]methanol (**4d**)

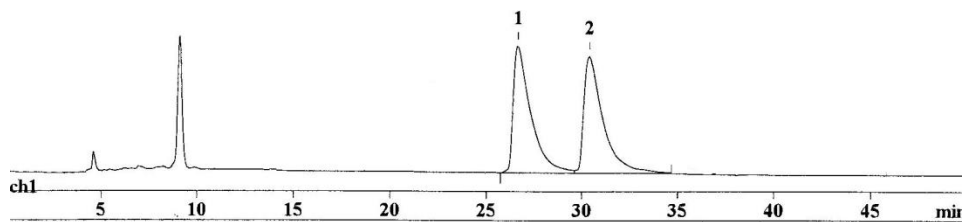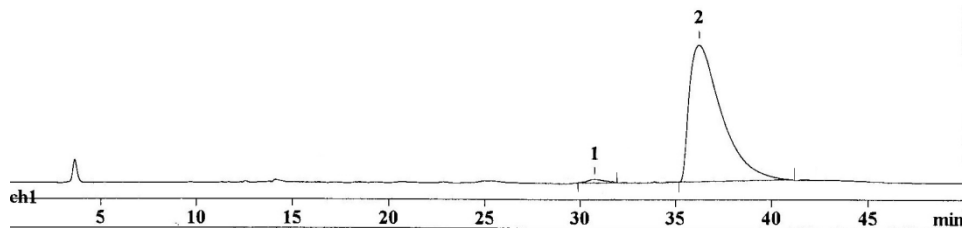

Quantitation method: Absolute concentration  
 Standard component: No  
 Normalization: 100.00

| No | Retention<br>min | Area<br>mV*sec | Area<br>% | Name |
|----|------------------|----------------|-----------|------|
| 1  | 31.13            | 1043.822       | 2.23      |      |
| 2  | 36.29            | 45764.180      | 97.77     |      |
| 2  | 50.00            | 46808.002      | 100.00    |      |

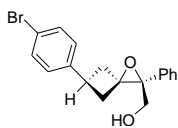

(2S,3s,5R)-[5-(4-Bromophenyl)-2-phenyl-1-oxaspiro[2.3]hexan-2-yl]methanol (**4e**)

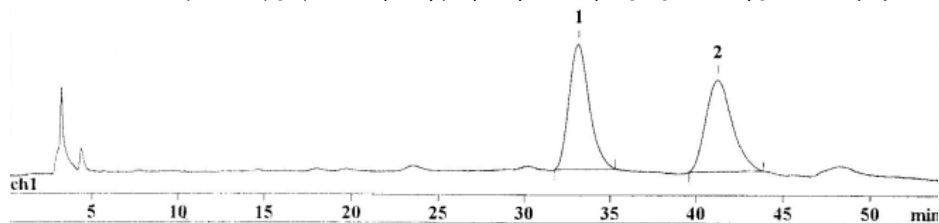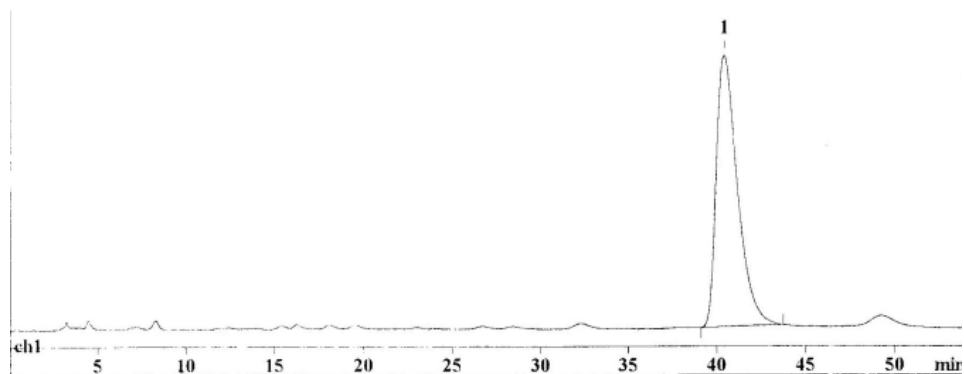

Quantitation method: Absolute concentration  
 Standard component: No  
 Normalization: 100.00

| No | Retention<br>min | Area<br>mV*sec | Area<br>% | Name |
|----|------------------|----------------|-----------|------|
| 1  | 40.43            | 3558.049       | 100.00    |      |



[(2S,3s,5R)-5-(Naphthalen-2-yl)-2-phenyl-1-oxaspiro[2.3]hexan-2-yl)methanol (**4f**)

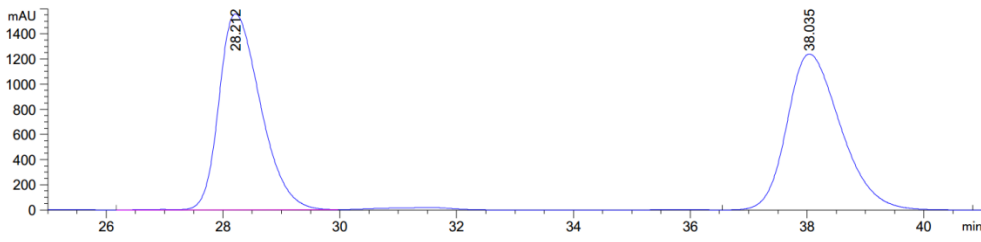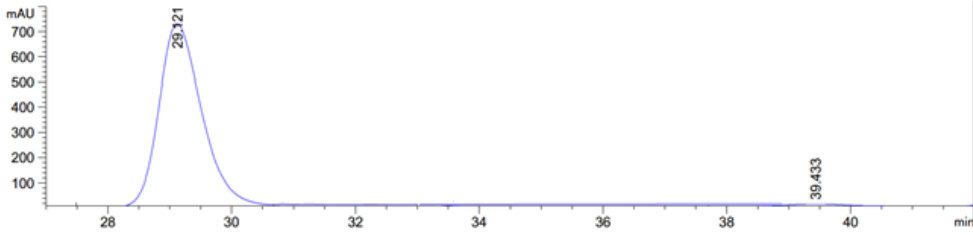

| Peak # | RetTime [min] | Type | Width [min] | Area [mAU*s] | Height [mAU] | Area %  |
|--------|---------------|------|-------------|--------------|--------------|---------|
| 1      | 29.121        | BV   | 0.7358      | 3.51984e4    | 728.35657    | 96.8471 |
| 2      | 39.433        | BB   | 1.1740      | 1145.89722   | 12.83028     | 3.1529  |

Totals : 3.63443e4 741.18685

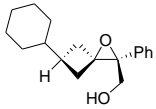

[(2S,3s,5R)-5-Cyclohexyl-2-phenyl-1-oxa-spiro[2.3]hexan-2-yl)methanol (**4g**)

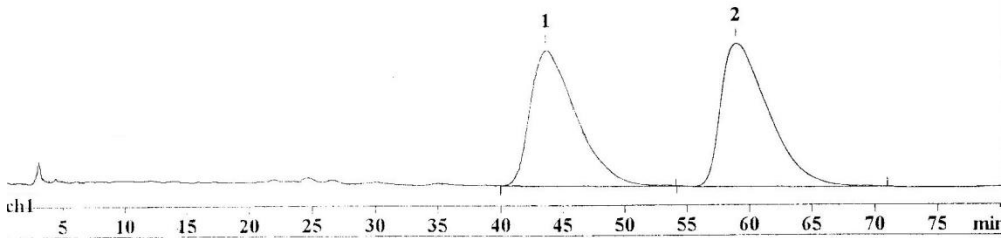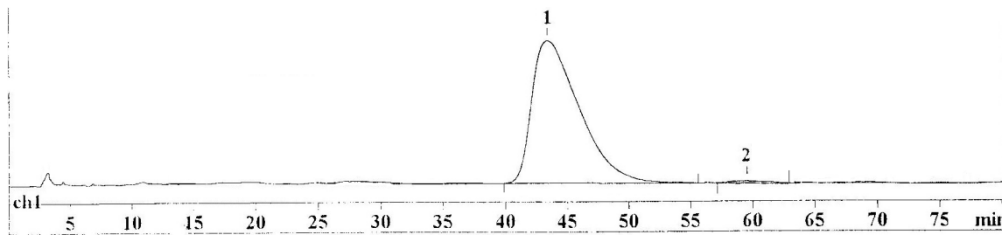

Quantitation method: Absolute concentration  
 Standard component: No  
 Normalization: 100.00

| No | Retention min | Area mV*sec | Area % | Name |
|----|---------------|-------------|--------|------|
| 1  | 43.77         | 2397.168    | 99.65  |      |
| 2  | 59.72         | 8.179       | 0.34   |      |
| 2  | 80.00         | 2405.347    | 100.00 |      |



[(2S,3s,5R)-5-Hexyl-2-phenyl-1-oxa-spiro[2.3]hexan-2-yl]methanol (**4h**)

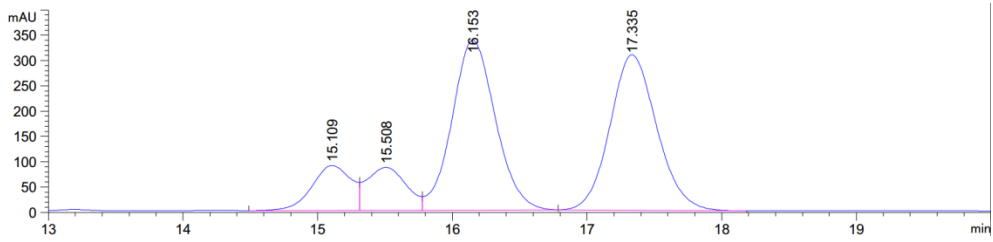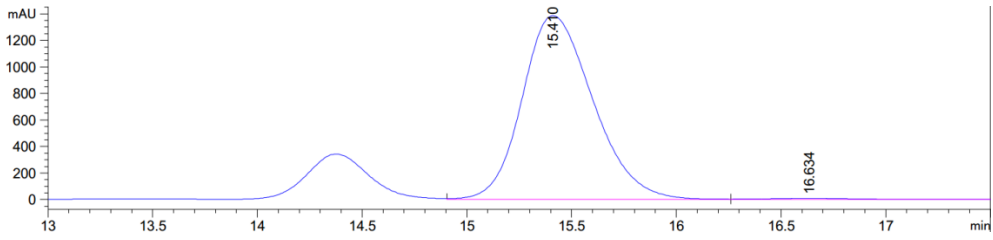

| Peak # | RetTime [min] | Type | Width [min] | Area [mAU*s] | Height [mAU] | Area %  |
|--------|---------------|------|-------------|--------------|--------------|---------|
| 1      | 15.410        | VV   | 0.3647      | 3.26053e4    | 1384.76416   | 99.3012 |
| 2      | 16.634        | VB   | 0.3800      | 229.45914    | 9.10516      | 0.6988  |

Totals : 3.28348e4 1393.86932

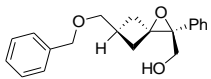

[(2S,3s,5R)-5-(benzyloxy)methyl-2-phenyl-1-oxaspiro[2.3]hexan-2-yl]methanol (**4i**)

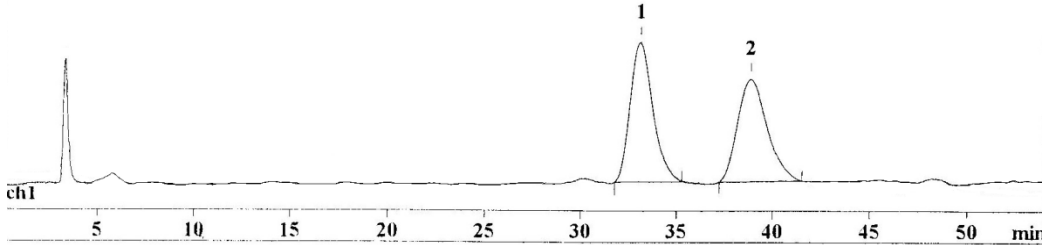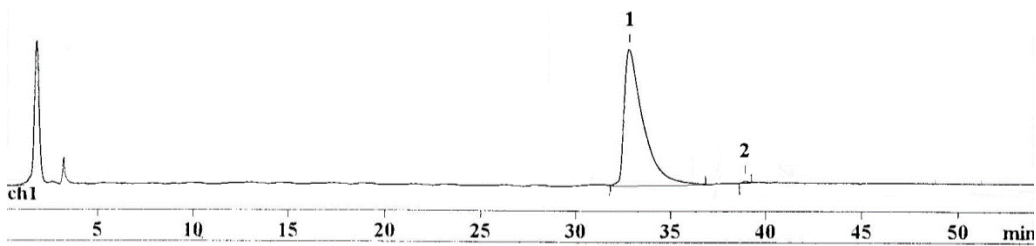

Quantitation method: Absolute concentration  
 Standard component: No  
 Normalization: 100.00

| No | Retention min | Area mV*sec | Area % | Name |
|----|---------------|-------------|--------|------|
| 1  | 33.19         | 1206.187    | 99.12  |      |
| 2  | 38.31         | 10.708      | 0.88   |      |
| 2  | 60.00         | 1216.895    | 100.00 |      |



[(2S,3s,6R)-2,6-Diphenyl-1-oxaspiro[2.5]octan-2-yl)methanol (**4k**)

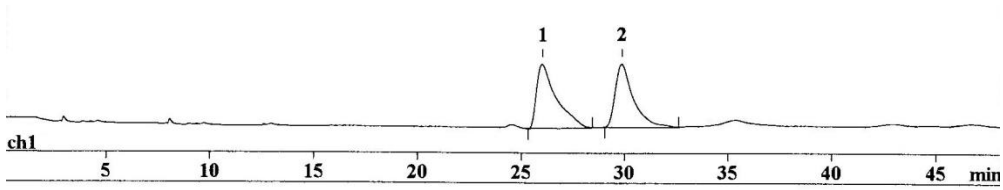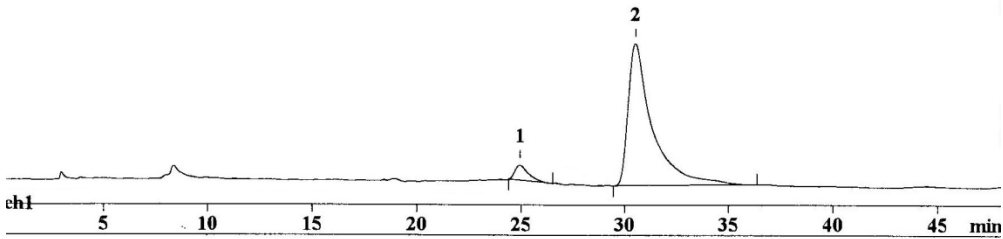

Quantitation method: Absolute concentration  
 Standard component: No  
 Normalization: 100.00

| No | Retention<br>min | Area<br>mV*sec | Area<br>% | Name |
|----|------------------|----------------|-----------|------|
| 1  | 24.94            | 155.365        | 5.55      |      |
| 2  | 30.50            | 2643.870       | 94.45     |      |
| 2  | 48.11            | 2799.234       | 100.00    |      |

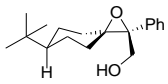

[(2S,3s,6R)-6-(tert-Butyl)-2-phenyl-1-oxaspiro[2.5]octan-2-yl)methanol (**4l**)

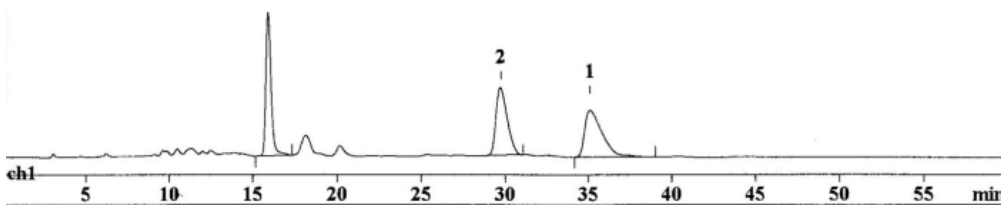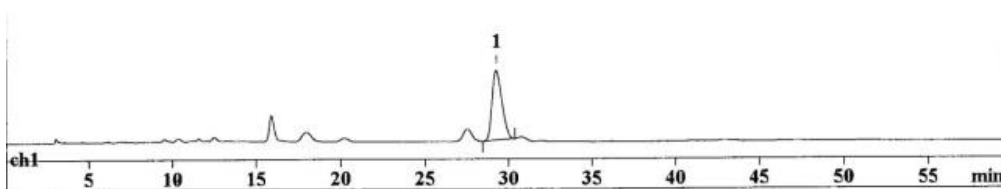

Quantitation method: Absolute concentration  
 Standard component: No  
 Normalization: 100.00

| No | Retention<br>min | Area<br>mV*sec | Area<br>% | Name |
|----|------------------|----------------|-----------|------|
| 1  | 29.25            | 1508.713       | 100.00    |      |

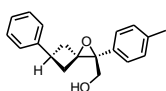

[(2S,3s,5R)-(5-Phenyl-2-p-tolyl-1-oxa-spiro[2.3]hex-2-yl)-methanol (**4ab**)

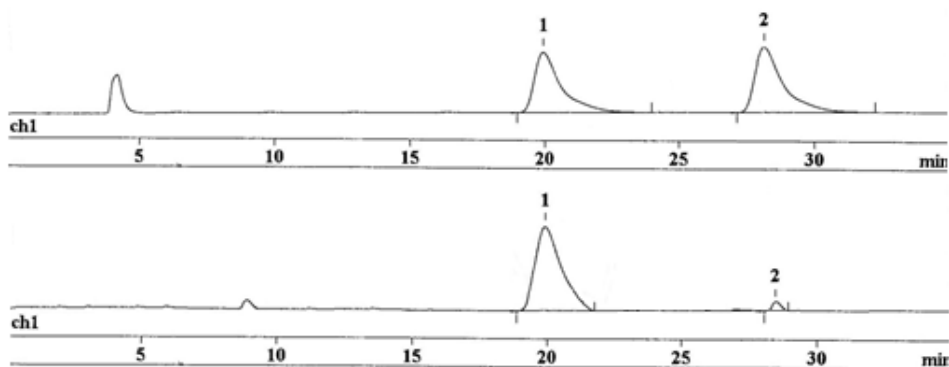

Quantitation method: Absolute concentration

| No | Retention<br>min | Area<br>mV*sec | Area<br>% | Name |
|----|------------------|----------------|-----------|------|
| 1  | 19.52            | 4157.685       | 90.17     |      |
| 2  | 28.76            | 453.255        | 9.83      |      |
| 2  | 54.00            | 4610.941       | 100.00    |      |

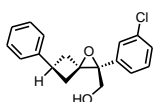

[(2S,3s,5R)-[2-(3-Chloro-phenyl)-5-phenyl-1-oxa-spiro[2.3]hex-2-yl]-methanol (**4ad**)

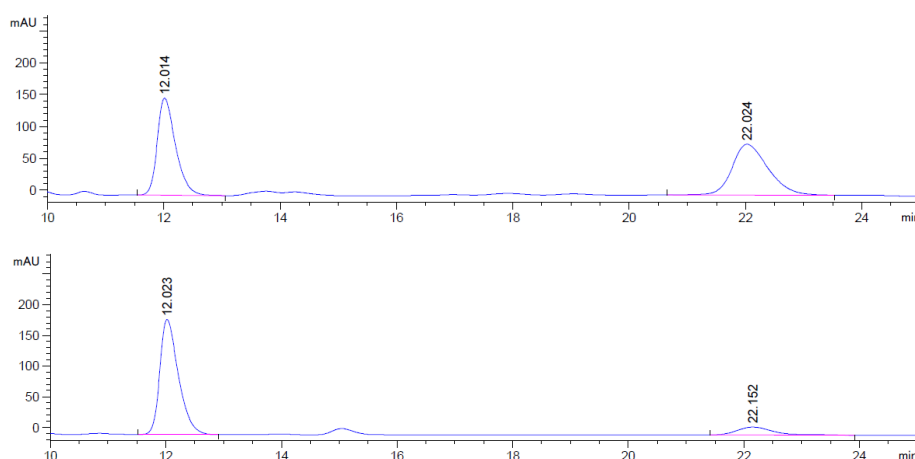

## 12. References and notes

1. a) F. Secci, A. Frongia, M. G. Rubanu, M. L. Sechi, G. Sarais, M. Arca, P. P. Piras, *Eur. J. Org. Chem.*, 2014, 6659; b) D. J. Aitken, A. M. Bernard, F. Capitta, A. Frongia, R. Guillot, J. Ollivier, P. P. Piras, F. Secci, M. Spiga, *Org. Biomol. Chem.*, 2012, **10**, 5045; c) F. Capitta, A. Frongia, J. Ollivier, D. J. Aitken, F. Secci, P. P. Piras, R. Guillot, *Synlett*, *Synlett*, 2015, **26**, 123.
2. V. Capriati, S. Florio, R. Luisi, A. Salomone, *Orglett*, 2002, **4**, 2445
3. B. Musio, G. J. Clarkson, M. Shipman, S. Florio, R. Luisi, *Orglett*, 2009, **11**, 325
4. S. E. Schaus, B. D. Brandes, J. F. Larrow, M. Tokunaga, K. B. Hansen, A. E. Gould, M. E. Furrow, E. N. Jacobsen, *J. Am. Chem. Soc.* 2002, **124**, 7, 1307
5. J. V. Matlock, S. P. Fritz, S. A. Harrison, D. M. Coe, E. M. McGarrigle, V. K. Aggarwal, *J. Org. Chem.*, 2014, **79**, 10226
6. A. Cabré, X. Verdguer, A. Riera, *Adv. Synth. Catal.*, 2019, **361**, 4196
